# Supplementary material for: Enantioselective synthesis of β-substituted chiral allylic amines via Rh-catalyzed asymmetric hydrogenation
Source: Royal Society of Chemistry journal article supplement (doi:10.1039/c6cc06047a), 2016-01-01
Supplement: c6cc06047a1.pdf [file c6cc06047a1.pdf]

# Enantioselective synthesis of $\beta$ -substituted Chiral Allylic Amines via Rh-Catalyzed Asymmetric Hydrogenation

*Qingli Wang,<sup>‡</sup> Wenchao Gao,<sup>‡</sup> Hui Lv,<sup>\*</sup> and Xumu Zhang<sup>\*</sup>*

## Table of Contents

|                                                                                                     |     |
|-----------------------------------------------------------------------------------------------------|-----|
| 1. General Information .....                                                                        | S2  |
| 2. General procedure for the synthesis of compound Ia-i .....                                       | S2  |
| 3. General procedure for the synthesis of compound IIa-m .....                                      | S3  |
| 4. General procedure for the synthesis of compound 1 .....                                          | S4  |
| 5. General Procedure for Asymmetric Hydrogenation of compound 1 .....                               | S8  |
| 6. Procedure for the synthesis of 3d and hydrogenation of 1d and 1l with low catalyst loading ..... | S13 |
| 7. References .....                                                                                 | S15 |
| 8. NMR spectra of 1 and 2, HPLC spectra of 2 .....                                                  | S16 |

## 1. General Information

Unless otherwise noted, all reagents and solvents were purchased from commercial suppliers and used without further purification. NMR spectra were recorded on Bruker ADVANCE III (400 MHz) spectrometers for  $^1\text{H}$  NMR and  $^{13}\text{C}$  NMR.  $\text{CDCl}_3$  was the solvent used for the NMR analysis, with tetramethylsilane as the internal standard. Chemical shifts were reported upfield to TMS (0.00 ppm) for  $^1\text{H}$  NMR and relative to  $\text{CDCl}_3$  (77.0 ppm) for  $^{13}\text{C}$  NMR. Optical rotation was determined using a Perkin Elmer 343 polarimeter. HPLC analysis was conducted on an Agilent 1260 Series instrument. Column Chromatography was performed with silica gel Merck 60 (300-400 mesh). All new products were further characterized by HRMS. A positive ion mass spectrum of sample was acquired on a Thermo LTQ-FT mass spectrometer with an electrospray ionization source.

## 2. General procedure for the synthesis of compound Ia-i<sup>[1, 2]</sup>

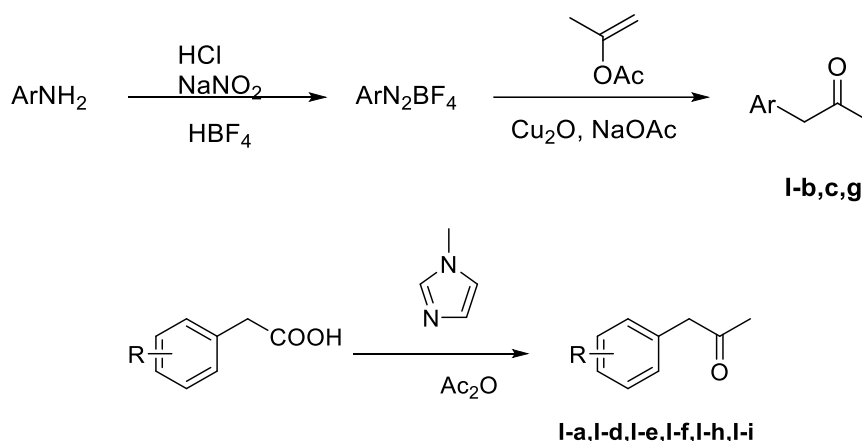

### Preparation of I-b, c, g

To a round bottom flask equipped with a magnetic stir bar was charged concentrated hydrochloric acid (38 mL),  $\text{H}_2\text{O}$  (55 mL), and freshly distilled arylamine (150 mmol) was added dropwise. The reaction mixture was then cooled to  $0^\circ\text{C}$  and a solution of sodium nitrite (10.6 g in 7 mL  $\text{H}_2\text{O}$ ) was added dropwise and keep the internal temperature did not exceed  $5^\circ\text{C}$ . After stirring at  $0^\circ\text{C}$  for 40 min, 17.04 gram fluoboric acid (40%) was added to the reaction mixture in 15 min. After stirring at  $0^\circ\text{C}$  for 30 min, the reaction mixture was quiescent at that temperature for 2 h. The reaction mixture was then filtered, the filter cake was washed with 30 mL of ethanol (95%) and anhydrous ether ( $30 \times 2$  mL). Then it was dried in vacuum oven to give aromatic diazonium tetrafluoroborate without further purification.

To a round bottom flask equipped with a magnetic stir bar was charged anhydrous sodium acetate (12.4 g), cuprous oxide (0.8 g), isopropenyl acetate (40 mL), aromaticdiazonium tetrafluoroborate (54 mmol) was added slowly. The reaction mixture was then warmed at 40-65 °C for 5-8 h. The precipitation was separated through filter and the filter residue was washed with ethyl acetate thoroughly. Combined the filtrate and washed with water and saturated sodium bicarbonate solution. The organic layer was dried over NaSO<sub>4</sub>, filtered. Removing the solvent by rotary evaporation, the crude material was purified by flash chromatography (*n*-hexane : ethyl acetate 50:1) to afford the target product.

#### Preparation of I-a, d, e, f, h, i

In a typical reaction, an aryl carboxylic acid (0.05 mol, 1 equiv.) was dissolved in Ac<sub>2</sub>O (0.25 mol, 25mL, 5 equiv.) at room temperature, and the solution was stirred and purged with N<sub>2</sub> for several minutes. The reaction was initiated by the addition of 1-Methylimidazole (0.025 mol, 0.5 equiv.), and the reaction was continuously purged with a slow flow of N<sub>2</sub> at room temperature until the starting material was completely disappear (by TLC). After completion, water (10 mL) was added to the reaction flask to hydrolyze Ac<sub>2</sub>O. The reaction mixture was extracted with ethyl acetate (3 × 20mL), and the extracts combined and washed with saturated Na<sub>2</sub>HCO<sub>3</sub> followed by water, then dried over MgSO<sub>4</sub> and filtered. Removing the solvent by rotary evaporation gave the product mixture, then purified by flash chromatography (*n*-hexane /ethyl acetate: 20:1-10:1) to give the desired products.

### 3. General procedure for the synthesis of compound IIa-m <sup>[3, 4]</sup>

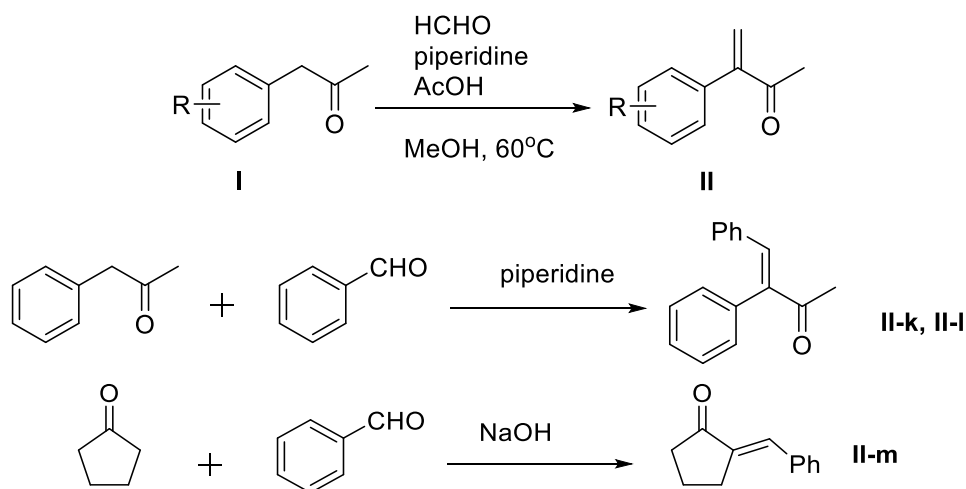

#### Preparation of IIa - j

A mixture composed of the 1-aryl-2-propanone (1.0 equiv.), 37% formaldehyde solution (1.2 equiv.), piperidine (10 mol%), and AcOH (10 mol%) was heated in anhydrous MeOH (1.4 M) at 60°C for 10 h. Upon completion, the reaction mixture was cooled down to ambient temperature, and then diluted with water. The aqueous layer was extracted several times with diethyl ether. The combined organic layers were dried over anhydrous Na<sub>2</sub>SO<sub>4</sub>, filtered and concentrated under reduced pressure. The crude residue was purified by flash chromatography on silica gel, using an appropriate *n*-hexane/ ethyl acetate (20:1-10:1) mixture as eluent to give the pure products II.

#### Preparation of II-k-l

A mixture of phenylacetone (30 mmol), benzaldehyde (30 mmol) and piperidine (0.8 mmol) in toluene (50 mL) was refluxed for 12 h using a Dean-Stark water separator. Then the reaction mixture was concentrated in vacuo and the residue was subjected to silica gel column chromatography (pentane /EtOAc, 20/1-10/1) to give the desired product.

#### Preparation of II-m

A mixture of aldehyde (30 mmol), cycloalkanone (36 mmol), diethyl ether (30 mL), and 1N NaOH solution (30 mL) was stirred at room temperature for 72 h. After reaction, the mixture was diluted with 50 mL of diethyl ether and the aqueous layer was separated and extracted with ether (3 × 20 mL). The combined ether solution was washed to neutral with water and dried over Na<sub>2</sub>SO<sub>4</sub>. The solvent was evaporated and the product was purified by silica gel column chromatography with petroleum/ ethyl acetate to yield the desired product.

### 4. General procedure for the synthesis of compound 1<sup>[3,5]</sup>

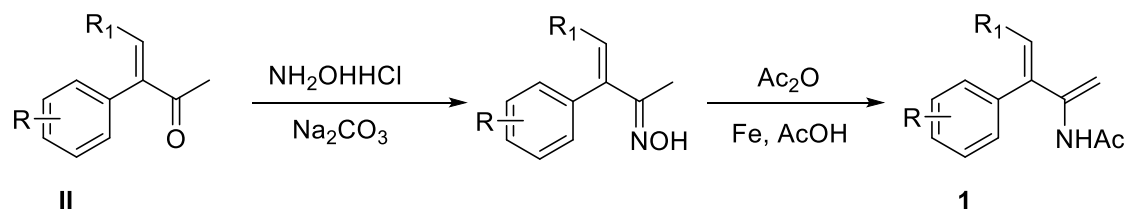

#### Preparation of 1

A methanol solution of the  $\alpha,\beta$ -unsaturated ketone (1.0 equiv.), hydroxylamine hydrochloride (1.1 equiv.), and Na<sub>2</sub>CO<sub>3</sub> (1.2 equiv.) was stirred at ambient temperature for 12 h. Then diluted with water. The resultant layer was extracted with

diethyl ether several times. The combined organic layer was dried over anhydrous  $\text{Na}_2\text{SO}_4$ , filtered and concentrated under reduced pressure. The crude residue was purified by flash chromatography on silica gel (*n*-hexane/EtOAc = 5/1-2/1) to give oxime as a white solid.

Acetic anhydride (3.0 equiv.) was added, in portions, to a solution of oxime (1.0 equiv.) obtained from first step in toluene (1.3 M) under a nitrogen atmosphere. Acetic acid (3.0 equiv.) was then added, followed by Fe powder (2.0 equiv.). The mixture was then heated to 70 °C overnight. The reaction was then cooled to room temperature and filtered through celite to remove solid residues, which were then washed with ethyl acetate. The combined filtrate was washed with brine. The organic phase was separated, dried by  $\text{Na}_2\text{SO}_4$  and evaporated. The crude material was purified by flash chromatography (*n*-hexane/ ethyl acetate 5:1-2:1) to afford the product **1** as white solid.

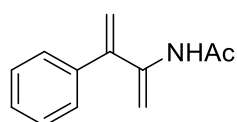

***N*-(3-phenylbuta-1,3-dien-2-yl)acetamide (1a)**

White solid, 0.56g, 60% yield;  $^1\text{H}$  NMR (400 MHz,  $\text{CDCl}_3$ )  $\delta$  7.32-7.48 (m, 5H), 6.74 (brs, 1H), 5.93 (s, 1H), 5.44 (s, 1H), 5.34 (s, 1H) 4.96 (s, 1H), 2.02 (s, 3H);  $^{13}\text{C}$  NMR (100 MHz,  $\text{CDCl}_3$ )  $\delta$  168.9, 147.4, 140.3, 138.4, 128.4, 128.3, 128.0, 114.9, 105.3, 24.5; ESI-HRMS Calculated for  $\text{C}_{12}\text{H}_{13}\text{NNaO}^+$  ( $[\text{M}+\text{Na}]^+$ ): 210.0889, found: 210.08894.

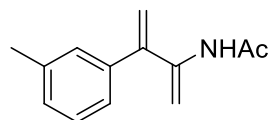

***N*-(3-m-tolylbuta-1,3-dien-2-yl)acetamide (1b)**

White solid, 0.52g, 51% yield;  $^1\text{H}$  NMR (400 MHz,  $\text{CDCl}_3$ )  $\delta$  7.14-7.30 (m, 5H), 6.67 (brs, 1H), 5.96 (s, 1H), 5.43 (s, 1H), 5.35 (s, 1H) 4.96 (s, 1H), 2.38 (s, 3H), 2.03 (s, 3H);  $^{13}\text{C}$  NMR (100 MHz,  $\text{CDCl}_3$ )  $\delta$  168.8, 147.5, 140.4, 138.2, 138.1, 129.1, 128.6, 128.3, 125.1, 114.8, 105.0, 24.6, 21.4; ESI-HRMS Calculated for  $\text{C}_{13}\text{H}_{16}\text{NO}^+$  ( $[\text{M}+\text{H}]^+$ ): 202.1226, found: 202.12240.

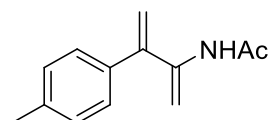

***N*-(3-p-tolylbuta-1,3-dien-2-yl)acetamide (1c)**

White solid, 0.72g, 71% yield;  $^1\text{H}$  NMR (400 MHz,  $\text{CDCl}_3$ )  $\delta$  7.26-7.33 (m, 2H), 7.14-7.19 (m, 2H), 6.77 (brs, 1H), 5.93 (s, 1H), 5.40 (s, 1H), 5.34 (s, 1H) 4.96 (s, 1H), 2.38 (s, 3H), 2.02 (s, 3H);  $^{13}\text{C}$  NMR (100 MHz,  $\text{CDCl}_3$ )  $\delta$  168.9, 147.2, 140.5, 138.2, 135.4, 129.1, 127.8, 114.3, 104.9, 24.5, 21.2; ESI-HRMS Calculated for  $\text{C}_{13}\text{H}_{15}\text{NNaO}^+$  ( $[\text{M}+\text{Na}]^+$ ): 224.1046, found: 224.10461.

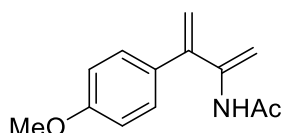

***N*-(3-(4-methoxyphenyl)buta-1,3-dien-2-yl)acetamide (1d)**

White solid, 0.49g, 45% yield;  $^1\text{H}$  NMR (400 MHz,  $\text{CDCl}_3$ )  $\delta$  7.27-7.36 (m, 2H), 6.81-6.92 (m, 2H), 6.50 (brs, 1H), 5.94 (s, 1H), 5.34 (s, 1H), 5.28 (s, 1H), 4.95 (s, 1H), 3.82 (s, 3H), 2.01 (s, 3H);  $^{13}\text{C}$  NMR (101 MHz,  $\text{CDCl}_3$ )  $\delta$  168.76, 159.73, 146.84, 140.54, 130.59, 129.18, 113.81, 113.61, 104.58, 55.33, 24.64; ESI-HRMS Calculated for  $\text{C}_{13}\text{H}_{16}\text{NO}_2^+$  ( $[\text{M}+\text{H}]^+$ ): 218.1176, found: 218.1175.

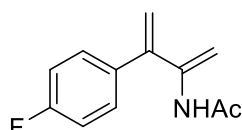

***N*-(3-(4-fluorophenyl)buta-1,3-dien-2-yl)acetamide (1e)**

White solid, 0.31g, 30% yield;  $^1\text{H}$  NMR (400 MHz,  $\text{CDCl}_3$ )  $\delta$  7.27-7.40 (m, 2H), 6.96-7.11 (m, 2H), 6.55 (brs, 1H), 5.90 (s, 1H), 5.40 (s, 1H), 5.30 (s, 1H), 4.91 (s, 1H), 2.03 (s, 3H);  $^{13}\text{C}$  NMR (101 MHz,  $\text{CDCl}_3$ )  $\delta$  168.71, 163.99, 161.52, 146.39, 140.13, 134.42, 129.77, 129.69, 115.48, 115.27, 114.78, 105.52, 24.58; ESI-HRMS Calculated for  $\text{C}_{12}\text{H}_{13}\text{FNO}^+$  ( $[\text{M}+\text{H}]^+$ ): 206.0976, found: 206.0975.

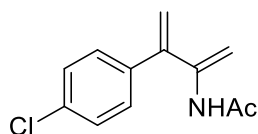

***N*-(3-(4-chlorophenyl)buta-1,3-dien-2-yl)acetamide (1f)**

White solid, 0.40g, 35% yield;  $^1\text{H}$  NMR (400 MHz,  $\text{CDCl}_3$ )  $\delta$  7.28-7.35 (m, 5H), 6.55 (brs, 1H), 5.89 (s, 1H), 5.42 (s, 1H), 5.33 (s, 1H), 4.91 (s, 1H), 2.02 (s, 3H);  $^{13}\text{C}$  NMR (101 MHz,  $\text{CDCl}_3$ )  $\delta$  168.71, 146.33, 139.95, 136.87, 134.23, 129.32, 128.64, 115.27, 105.71, 24.57; ESI-HRMS Calculated for  $\text{C}_{12}\text{H}_{13}\text{ClNO}^+$  ( $[\text{M}+\text{H}]^+$ ): 222.0680, found: 222.0679.

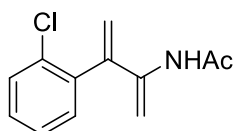

***N*-(3-(2-chlorophenyl)buta-1,3-dien-2-yl)acetamide (1g)**

White solid, 0.50g, 42% yield;  $^1\text{H}$  NMR (400 MHz,  $\text{CDCl}_3$ )  $\delta$  7.36-7.46 (m, 1H), 7.25-7.32 (m, 3H), 6.87 (brs, 1H), 5.80 (s, 1H), 5.59 (s, 1H), 5.21 (s, 1H), 4.66 (s, 1H), 2.15 (s, 3H);  $^{13}\text{C}$  NMR (100 MHz,  $\text{CDCl}_3$ )  $\delta$  168.9, 145.2, 138.6, 138.55, 133.2, 131.4, 129.6, 129.3, 126.7, 115.4, 106.8, 24.5; ESI-HRMS Calculated for  $\text{C}_{12}\text{H}_{12}\text{ClNNaO}^+$  ( $[\text{M}+\text{Na}]^+$ ): 244.0500, found: 244.04996.

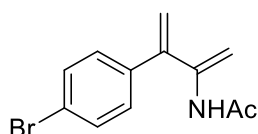

***N*-(3-(4-bromophenyl)buta-1,3-dien-2-yl)acetamide (1h)**

White solid, 0.40g, 30% yield;  $^1\text{H}$  NMR (400 MHz,  $\text{CDCl}_3$ )  $\delta$  7.42-7.53 (m, 2H), 7.38 – 7.13 (m, 2H), 6.53 (brs, 1H), 5.90 (s, 1H), 5.44 (s, 1H), 5.35 (s, 1H), 4.92 (s, 1H), 2.03 (s, 3H);  $^{13}\text{C}$  NMR (101 MHz,  $\text{CDCl}_3$ )  $\delta$  168.69, 146.39, 139.86, 137.34, 131.61, 129.64, 122.45, 115.32, 105.75, 24.58; ESI-HRMS Calculated for  $\text{C}_{12}\text{H}_{13}\text{BrNO}^+$  ( $[\text{M}+\text{H}]^+$ ): 266.0175, found: 266.0175, 268.0152.

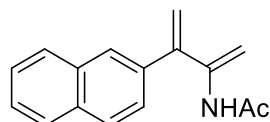

***N*-(3-(naphthalen-2-yl)buta-1,3-dien-2-yl)acetamide (1i)**

White solid, 0.45g, 38% yield;  $^1\text{H}$  NMR (400 MHz,  $\text{CDCl}_3$ )  $\delta$  7.73-8.04 (m, 4H), 7.41-7.57 (m, 3H), 6.57 (brs, 1H), 6.02 (s, 1H), 5.53 (s, 1H), 5.49 (s, 1H), 5.01 (s, 1H), 2.00 (s, 3H);  $^{13}\text{C}$  NMR (101 MHz,  $\text{CDCl}_3$ )  $\delta$  168.81, 147.42, 140.35, 135.61, 133.24, 133.16, 128.24, 128.10, 127.65, 127.19, 126.44, 125.76, 115.56, 105.08, 24.67; ESI-HRMS Calculated for  $\text{C}_{16}\text{H}_{16}\text{NO}^+$  ( $[\text{M}+\text{H}]^+$ ): 238.1226, found: 238.1225.

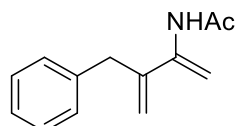

***N*-(3-benzylbuta-1,3-dien-2-yl)acetamide (1j)**

White solid, 0.48g, 48% yield;  $^1\text{H}$  NMR (400 MHz,  $\text{CDCl}_3$ )  $\delta$  7.27-7.36 (m, 2H), 7.16-7.25 (m, 3H), 6.52 (brs, 1H), 5.66 (s, 1H), 5.30 (s, 1H), 5.10 (s, 1H), 4.97 (s, 1H), 3.60 (s, 2H), 2.04 (s, 3H);  $^{13}\text{C}$  NMR (101 MHz,  $\text{CDCl}_3$ )  $\delta$  168.68, 144.29, 139.29, 138.95, 128.78, 128.53, 126.45, 114.20, 104.96, 40.13, 24.49; ESI-HRMS Calculated for  $\text{C}_{13}\text{H}_{16}\text{NO}^+$  ( $[\text{M}+\text{H}]^+$ ): 202.1226, found : 202.1225.

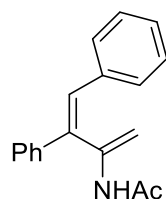

***N*-(3,4-diphenylbuta-1,3-dien-2-yl)acetamide (1k)**

White solid, 0.39g, 30% yield;  $^1\text{H}$  NMR (400 MHz,  $\text{CDCl}_3$ )  $\delta$  7.27-7.44 (m, 3H), 7.16-7.24 (m, 2H), 7.12 – 7.05 (m, 3H), .686-6.99 (m, 2H), 6.83 (s, 1H), 6.64 (brs, 1H), 5.83 (s, 1H), 4.92 (s, 1H), 2.04 (s, 3H);  $^{13}\text{C}$  NMR (101 MHz,  $\text{CDCl}_3$ )  $\delta$  168.75, 142.12, 139.75, 137.32, 136.26, 130.16, 129.66, 128.80, 128.04, 127.85, 127.28, 106.99, 24.51; ESI-HRMS Calculated for  $\text{C}_{18}\text{H}_{18}\text{NO}^+$  ( $[\text{M}+\text{H}]^+$ ): 264.1383, found : 264.1381.

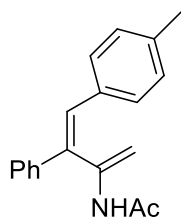

**N-(3-phenyl-4-(p-tolyl)buta-1,3-dien-2-yl)acetamide (1l)**

White solid, 0.40g, 26% yield;  $^1\text{H}$  NMR (400 MHz,  $\text{CDCl}_3$ )  $\delta$  7.27-7.41 (m, 3H), 7.15-7.24 (m, 2H), 6.88 –6.96 (m, 2H), 6.71-6.87 (m, 3H), 6.54 (brs, 1H), 5.82 (s, 1H), 4.90 (s, 1H), 2.25 (s, 3H), 2.05 (s, 3H);  $^{13}\text{C}$  NMR (101 MHz,  $\text{CDCl}_3$ )  $\delta$  168.78, 142.14, 138.82, 137.54, 137.24, 133.32, 130.15, 129.58, 128.81, 127.93, 127.75, 106.75, 24.54, 21.20; ESI-HRMS Calculated for  $\text{C}_{19}\text{H}_{20}\text{NO}^+$  ( $[\text{M}+\text{H}]^+$ ): 278.1539, found : 278.1538.

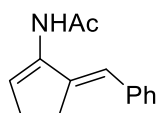

**(E)-N-(5-benzylidenecyclopent-1-en-1-yl)acetamide (1m)**

Dark red solid, 0.38g, 36% yield;  $^1\text{H}$  NMR (400 MHz,  $\text{CDCl}_3$ )  $\delta$  7.39-7.44 (m, 4H), 7.15-7.24 (m, 1H), 6.96 (brs, 1H), 6.73 (t,  $J = 2.7$  Hz, 1H), 6.11 (s, 1H), 2.93 – 2.79 (m, 2H), 2.58-2.66 (m, 2H), 2.21 (s, 3H);  $^{13}\text{C}$  NMR (101 MHz,  $\text{CDCl}_3$ )  $\delta$  168.40, 143.42, 137.51, 136.33, 128.49, 128.19, 126.32, 123.56, 114.30, 29.64, 28.60, 24.41; ESI-HRMS Calculated for  $\text{C}_{14}\text{H}_{16}\text{NO}^+$  ( $[\text{M}+\text{H}]^+$ ): 214.1226, found : 214.1226.

**5. General Procedure for Asymmetric Hydrogenation of compound 1**

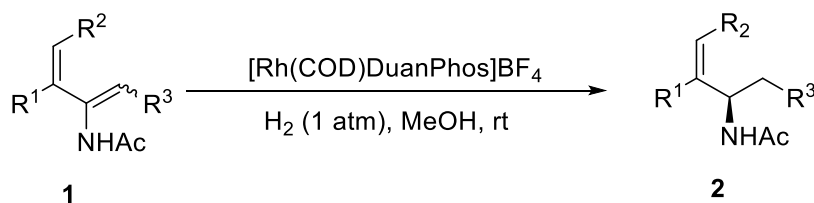

A stock solution was made by mixing  $[\text{Rh}(\text{cod})_2]\text{BF}_4$  with (*Sc,Rp*)-Duanphos in a 1:1.1 molar ratio in  $\text{CH}_2\text{Cl}_2$  at room temperature for 30 min in a nitrogen-filled glovebox. An aliquot of the catalyst solution (0.5mL, 0.0005 mmol) was transferred by syringe into the vials charged with different substrates (0.05 mmol for each) in anhydrous MeOH (0.5 mL). The vials were subsequently transferred into an autoclave into which hydrogen gas was charged. The reaction was then stirred under  $\text{H}_2$  (1 atm) at room temperature for 6 h. The hydrogen gas was released slowly and carefully. The solution was concentrated and passed through a short column of silica gel (eluent: EtOAc) to yield the desired products. The ee values of compounds **2** were determined by HPLC analysis on a chiral stationary phase.



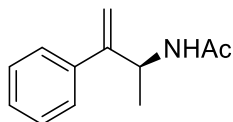

**(S)-N-(3-phenylbut-3-en-2-yl)acetamide (2a)**

White solid, 9.3 mg, 97% yield, 95% ee;  $[\alpha]_{\text{D}}^{20} = -26.0$  ( $c = 0.5$ ,  $\text{CHCl}_3$ ); The enantiomeric excess was determined by HPLC on Chiralpak OD-H column, hexane: isopropanol = 97: 3; flow rate = 1.0 mL/min; UV detection at 220 nm;  $t_{\text{R}} = 16.8$  min (major), 21.6 min (minor).  $^1\text{H}$  NMR (400 MHz,  $\text{CDCl}_3$ )  $\delta = 7.38\text{-}7.46$  (m, 2H), 7.29-7.38 (m, 3H), 5.67 (br, 1H), 5.35 (s, 1H), 5.24 (s, 1H), 5.03-5.19 (m, 1H), 1.96 (s, 3H), 1.33 (d,  $J = 6.4$  Hz, 3H);  $^{13}\text{C}$  NMR (100 MHz,  $\text{CDCl}_3$ )  $\delta = 169.2, 150.5, 139.9, 128.4, 127.8, 126.6, 112.2, 47.5, 23.4, 20.3$ . ESI-HRMS Calculated for  $\text{C}_{12}\text{H}_{15}\text{NNaO}^+$  ( $[\text{M}+\text{Na}]^+$ ): 212.1046, found: 212.10463.

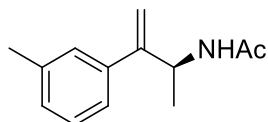

**(S)-N-(3-m-tolylbut-3-en-2-yl)acetamide (2b)**

Yellow oil, 9.6 mg, 94% yield, 95% ee;  $[\alpha]_{\text{D}}^{20} = -21.0$  ( $c = 0.4$ ,  $\text{CH}_2\text{Cl}_2$ ); The enantiomeric excess was determined by HPLC on Chiralpak OJ-H column, hexane: isopropanol = 95: 5; flow rate = 1.0 mL/min; UV detection at 254 nm;  $t_{\text{R}} = 11.7$  min (minor), 13.7 min (major).  $^1\text{H}$  NMR (400 MHz,  $\text{CDCl}_3$ )  $\delta = 7.18\text{-}7.27$  (m, 3H), 7.09-7.16 (m, 1H), 5.60 (br, 1H), 5.32 (s, 1H), 5.21 (s, 1H), 5.02-5.16 (m, 1H), 2.37 (s, 3H), 1.97 (s, 3H), 1.33 (d,  $J = 6.8$  Hz, 3H);  $^{13}\text{C}$  NMR (100 MHz,  $\text{CDCl}_3$ )  $\delta = 169.2, 150.7, 139.9, 137.9, 128.5, 128.3, 127.4, 123.8, 111.9, 47.6, 23.4, 21.5, 20.4$ . ESI-HRMS Calculated for  $\text{C}_{13}\text{H}_{17}\text{NNaO}^+$  ( $[\text{M}+\text{Na}]^+$ ): 226.1202, found: 226.12024.

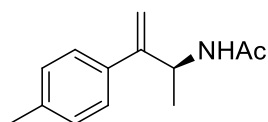

**(S)-N-(3-p-tolylbut-3-en-2-yl)acetamide (2c)**

White solid, 9.5 mg, 93% yield, 94% ee;  $[\alpha]_{\text{D}}^{20} = -22.7$  ( $c = 0.4$ ,  $\text{CH}_2\text{Cl}_2$ ); The enantiomeric excess was determined by HPLC on Chiralpak OJ-H column, hexane: isopropanol = 95: 5; flow rate = 1.0 mL/min; UV detection at 254 nm;  $t_{\text{R}} = 13.5$  min (minor), 15.7 min (major).  $^1\text{H}$  NMR (400 MHz,  $\text{CDCl}_3$ )  $\delta = 7.29\text{-}7.36$  (m, 2H), 7.13-7.18 (m, 2H), 5.61 (br, 1H), 5.33 (s, 1H), 5.20 (s, 1H), 5.04-5.17 (m, 1H), 2.36 (s, 3H), 1.96 (s, 3H), 1.33 (d,  $J = 6.8$  Hz, 3H);  $^{13}\text{C}$  NMR (100 MHz,  $\text{CDCl}_3$ )  $\delta = 169.2, 150.5, 137.6, 136.9, 129.1, 126.5, 111.5, 47.4, 23.4, 21.1, 20.3$ . ESI-HRMS Calculated for  $\text{C}_{13}\text{H}_{17}\text{NNaO}^+$  ( $[\text{M}+\text{Na}]^+$ ): 226.1202, found: 226.12044.

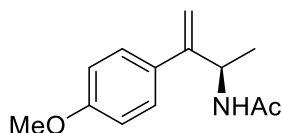

**(R)-N-(3-(4-methoxyphenyl)but-3-en-2-yl)acetamide (2d)**

White solid, 10.5 mg, 95% yield, 91% ee;  $[\alpha]_D^{20} = +25.3$  ( $c = 1.0$ ,  $\text{CHCl}_3$ ); The enantiomeric excess was determined by HPLC on Chiralpak OD-H column, hexane: isopropanol = 95: 5; flow rate = 1.0 mL/min; UV detection at 254 nm;  $t_R = 19.9$  min (major), 29.7 min (minor);  $^1\text{H NMR}$  (400 MHz,  $\text{CDCl}_3$ )  $\delta$  7.41 – 7.30 (m, 2H), 6.99 – 6.72 (m, 2H), 5.56 (br s, 1H), 5.27 (s, 1H), 5.14 (s, 1H), 5.01-5.11 (m, 1H), 3.80 (s, 3H), 1.93 (s, 3H), 1.31 (d,  $J = 6.8$  Hz, 3H);  $^{13}\text{C NMR}$  (101 MHz,  $\text{CDCl}_3$ )  $\delta$  169.17, 159.29, 149.66, 132.18, 127.70, 113.72, 110.83, 55.28, 47.27, 23.45, 20.28; ESI-HRMS Calculated for  $\text{C}_{13}\text{H}_{18}\text{NO}_2^+$  ( $[\text{M}+\text{H}]^+$ ): 220.1332, found : 220.1330.

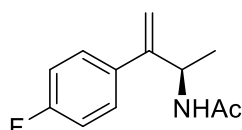

**(R)-N-(3-(4-fluorophenyl)but-3-en-2-yl)acetamide (2e)**

White solid, 10.0 mg, 96% yield, 86% ee;  $[\alpha]_D^{20} = +21.9$  ( $c = 1.0$ ,  $\text{CHCl}_3$ ); The enantiomeric excess was determined by HPLC on Chiralpak OD-H column, hexane: isopropanol = 95: 5; flow rate = 0.5 mL/min; UV detection at 220 nm;  $t_R = 22.4$  min (major), 26.4 min (minor);  $^1\text{H NMR}$  (400 MHz,  $\text{CDCl}_3$ )  $\delta$  7.45 – 7.30 (m, 2H), 7.07 – 6.94 (m, 2H), 5.56 (brs, 1H), 5.28 (s, 1H), 5.20 (s, 1H), 5.00-5.11 (m, 1H), 1.94 (s, 3H), 1.30 (d,  $J = 6.8$  Hz, 3H);  $^{13}\text{C NMR}$  (101 MHz,  $\text{CDCl}_3$ )  $\delta$  169.18, 163.69, 161.24, 149.55, 135.96, 135.92, 128.33, 128.25, 115.35, 115.14, 112.20, 47.42, 23.40, 20.24; ESI-HRMS Calculated for  $\text{C}_{12}\text{H}_{15}\text{FNO}^+$  ( $[\text{M}+\text{H}]^+$ ): 208.1132, found : 208.1131.

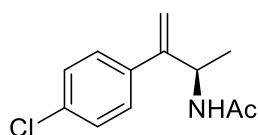

**(R)-N-(3-(2-chlorophenyl)but-3-en-2-yl)acetamide (2g)**

White solid, 10.9 mg, 97% yield, 97% ee;  $[\alpha]_D^{20} = +18.4$  ( $c = 1.0$ ,  $\text{CHCl}_3$ ); The enantiomeric excess was determined by HPLC on Chiralpak OD-H column, hexane: isopropanol = 95: 5; flow rate = 1.0 mL/min; UV detection at 220 nm;  $t_R = 23.9$  min (major), 28.2 min (minor);  $^1\text{H NMR}$  (400 MHz,  $\text{CDCl}_3$ )  $\delta$  7.36 – 7.31 (m, 2H), 7.31 – 7.27 (m, 2H), 5.52 (brs, 1H), 5.31 (s, 1H), 5.23 (s, 1H), 5.00-5.10 (m, 1H), 1.94 (s, 3H), 1.30 (d,  $J = 6.8$  Hz, 3H);  $^{13}\text{C NMR}$  (101 MHz,  $\text{CDCl}_3$ )  $\delta$  169.18, 149.46, 138.34, 133.64, 128.55, 127.97, 112.68, 47.25, 23.40, 20.22; ESI-HRMS Calculated for  $\text{C}_{12}\text{H}_{15}\text{ClNO}^+$  ( $[\text{M}+\text{H}]^+$ ): 224.0837, found : 224.0836.

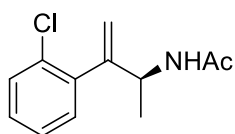

**(S)-N-(3-(2-chlorophenyl)but-3-en-2-yl)acetamide (2g)**

Yellow oil, 11.0 mg, 98% ee;  $[\alpha]_D^{20} = -20.5$  ( $c = 0.4$ ,  $\text{CH}_2\text{Cl}_2$ ); The enantiomeric

excess was determined by HPLC on Chiralpak OJ-H column, hexane: isopropanol = 99: 1; flow rate = 1.0 mL/min; UV detection at 210 nm;  $t_R$  = 42.7 min (major), 48.4 min (minor).  $^1\text{H}$  NMR (400 MHz,  $\text{CDCl}_3$ )  $\delta$  = 7.38-7.42 (m, 1H), 7.21-7.27 (m, 3H), 5.60 (br, 1H), 5.45 (s, 1H), 5.12 (s, 1H), 4.87-5.02 (m, 1H), 1.96 (s, 3H), 1.29 (d,  $J$  = 6.8 Hz, 3H);  $^{13}\text{C}$  NMR (100 MHz,  $\text{CDCl}_3$ )  $\delta$  = 159.1, 148.3, 139.7, 132.6, 130.5, 129.6, 128.7, 126.5, 115.5, 49.3, 23.4, 19.8. ESI-HRMS Calculated for  $\text{C}_{12}\text{H}_{14}\text{ClNNaO}^+$  ( $[\text{M}+\text{Na}]^+$ ): 246.0656, found 246.06561.

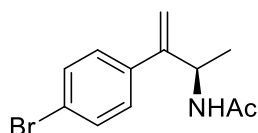

**(R)-N-(3-(4-bromophenyl)but-3-en-2-yl)acetamide (2h)**

White solid, 13.4 mg, 99% yield, 90% ee;  $[\alpha]_D^{20}$  = +11.3 ( $c=1.0$ ,  $\text{CHCl}_3$ ); The enantiomeric excess was determined by HPLC on Chiralpak AD-H column, hexane: isopropanol = 95: 5; flow rate = 0.5 mL/min; UV detection at 220 nm;  $t_R$  = 30.5 min (major), 35.9 min (minor);  $^1\text{H}$  NMR (400 MHz,  $\text{CDCl}_3$ )  $\delta$  7.59 – 7.38 (m, 2H), 7.33 – 7.17 (m, 2H), 5.48 (brs, 1H), 5.33 (s, 1H), 5.24 (s, 1H), 5.01-5.11 (m, 1H), 1.95 (s, 3H), 1.31 (d,  $J$  = 6.8 Hz, 3H);  $^{13}\text{C}$  NMR (101 MHz,  $\text{CDCl}_3$ )  $\delta$  169.15, 149.51, 138.80, 131.51, 128.32, 121.84, 112.75, 76.74, 47.20, 23.42, 20.22; ESI-HRMS Calculated for  $\text{C}_{12}\text{H}_{15}\text{BrNO}^+$  ( $[\text{M}+\text{H}]^+$ ): 268.0332, found : 268.0332, 270.0332.

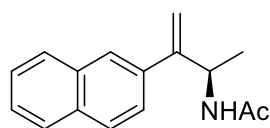

**(R)-N-(3-(naphthalen-2-yl)but-3-en-2-yl)acetamide (2i)**

White solid, 10.4 mg, 86% yield, 84% ee;  $[\alpha]_D^{20}$  = -0.9 ( $c = 1.0$ ,  $\text{CHCl}_3$ ); The enantiomeric excess was determined by HPLC on Chiralpak AD-H column, hexane: isopropanol = 95: 5; flow rate = 0.5 mL/min; UV detection at 220 nm;  $t_R$  = 32.1 min (major), 35.8 min (minor);  $^1\text{H}$  NMR (400 MHz,  $\text{CDCl}_3$ )  $\delta$  7.91 – 7.72 (m, 4H), 7.52-7.58 (m, 1H), 7.43-7.50 (m, 2H), 5.54 (br s, 1H), 5.47 (s, 1H), 5.32 (s, 1H), 5.20-5.29 (m, 1H), 1.95 (s, 3H), 1.37 (d,  $J$  = 6.7 Hz, 3H);  $^{13}\text{C}$  NMR (101 MHz,  $\text{CDCl}_3$ )  $\delta$  169.18, 150.42, 137.20, 133.28, 132.93, 128.26, 127.98, 127.55, 126.25, 126.07, 125.45, 124.98, 112.66, 47.48, 23.48, 20.43; ESI-HRMS Calculated for  $\text{C}_{16}\text{H}_{18}\text{NO}^+$  ( $[\text{M}+\text{H}]^+$ ): 240.1383, found : 240.1381.

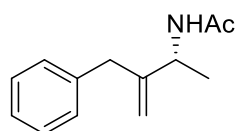

**(R)-N-(3-benzylbut-3-en-2-yl)acetamide (2j)**

White solid, 10.0 mg, 98%yield, 96% ee;  $[\alpha]_D^{20}$  = +53.6 ( $c = 0.5$ ,  $\text{CHCl}_3$ ); The enantiomeric excess was determined by HPLC on Chiralpak OJ-H column, hexane: isopropanol = 95: 5; flow rate = 0.5 mL/min; UV detection at 220 nm;  $t_R$  = 33.8 min (major), 41.0 min (minor);  $^1\text{H}$  NMR (400 MHz,  $\text{CDCl}_3$ )  $\delta$  7.37 – 7.24 (m, 2H), 7.24 –

7.14 (m, 3H), 5.25 (brs, 1H), 5.07 (s, 1H), 4.84 (s, 1H), 4.66 – 4.45 (m, 1H), 3.39 (s, 2H), 1.85 (s, 3H), 1.24 (d,  $J = 6.9$  Hz, 3H);  $^{13}\text{C}$  NMR (101 MHz,  $\text{CDCl}_3$ )  $\delta$  169.09, 149.67, 139.21, 129.00, 128.47, 126.33, 112.30, 48.53, 40.76, 23.41, 19.88; ESI-HRMS Calculated for  $\text{C}_{13}\text{H}_{18}\text{NO}^+$  ( $[\text{M}+\text{H}]^+$ ): 204.1383, found : 204.1382.

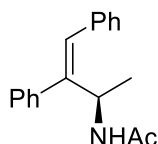

**(R)-N-(3,4-diphenylbut-3-en-2-yl)acetamide (2k)**

White solid, 13.0 mg, 98% yield, 97% ee;  $[\alpha]_{\text{D}}^{20} = +17.3$  ( $c=1.0$ ,  $\text{CHCl}_3$ ); The enantiomeric excess was determined by HPLC on Chiralpak OD-H column, hexane: isopropanol = 90: 10; flow rate = 1.0 mL/min; UV detection at 254 nm;  $t_{\text{R}} = 19.1$  min (major), 7.8 min (minor);  $^1\text{H}$  NMR (400 MHz,  $\text{CDCl}_3$ )  $\delta$  7.27 – 7.44 (m, 3H), 7.14-7.20 (m, 2H), 6.95 – 7.12 (m, 3H), 6.93 – 6.75 (m, 2H), 6.57 (s, 1H), 5.47 (d,  $J = 8.2$  Hz, 1H), 5.03 – 4.73 (m, 1H), 1.96 (s, 3H), 1.31 (d,  $J = 6.9$  Hz, 3H).  $^{13}\text{C}$  NMR (101 MHz,  $\text{CDCl}_3$ )  $\delta$  169.00, 143.24, 138.54, 136.40, 129.25, 129.17, 128.79, 127.88, 127.48, 126.77, 126.74, 51.89, 23.53, 20.60 ESI-HRMS Calculated for  $\text{C}_{18}\text{H}_{20}\text{NO}^+$  ( $[\text{M}+\text{H}]^+$ ): 266.1539, found : 266.1537.

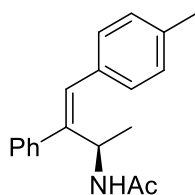

**(R)-N-(3-phenyl-4-(p-tolyl)but-3-en-2-yl)acetamide (2l)**

White solid, 13.8 mg, 99% yield, 97% ee;  $[\alpha]_{\text{D}}^{20} = +92.6$  ( $c = 1.0$ ,  $\text{CHCl}_3$ ); The enantiomeric excess was determined by HPLC on Chiralpak OD-H column, hexane: isopropanol = 95: 5; flow rate = 1.0 mL/min; UV detection at 254 nm;  $t_{\text{R}} = 13.7$  min (major), 19.9 min (minor);  $^1\text{H}$  NMR (400 MHz,  $\text{CDCl}_3$ )  $\delta$  7.29-7.41 (m, 3H), 7.23 – 7.06 (m, 2H), 6.83-6.90 (m, 2H), 6.71-6.81 (m, 2H), 6.54 (s, 1H), 5.48 (d,  $J = 8.2$  Hz, 1H), 4.86-5.00 (m, 1H), 2.22 (s, 3H), 1.95 (s, 3H), 1.30 (d,  $J = 6.9$  Hz, 3H);  $^{13}\text{C}$  NMR (101 MHz,  $\text{CDCl}_3$ )  $\delta$  168.98, 142.24, 138.75, 136.52, 133.49, 129.29, 129.06, 128.79, 128.63, 127.39, 126.72, 51.89, 23.54, 21.12, 20.63; ESI-HRMS Calculated for  $\text{C}_{19}\text{H}_{22}\text{NO}^+$  ( $[\text{M}+\text{H}]^+$ ): 280.1696, found : 280.1696.

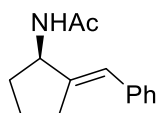

**(R)-N-(2-benzylidenecyclopentyl)acetamide (2m)**

White solid, 10.1 mg, 94% yield, 84% ee;  $[\alpha]_{\text{D}}^{20} = +53.6$  ( $c=0.5$ ,  $\text{CHCl}_3$ ); The enantiomeric excess was determined by HPLC on Chiralpak AD-H column, hexane: isopropanol = 95: 5; flow rate = 1.0 mL/min; UV detection at 220 nm;  $t_{\text{R}} = 18.4$  min (major), 22.0 min (minor);  $^1\text{H}$  NMR (400 MHz,  $\text{CDCl}_3$ )  $\delta$  7.39 – 7.16 (m, 5H), 6.37 (s,

1H), 5.54 (brs, 1H), 4.83-4.93 (m, 1H), 2.78 – 2.56 (m, 2H), 2.25 – 2.14 (m, 1H), 2.07 (s, 3H), 1.93 – 1.81 (m, 1H), 1.76 – 1.61 (m, 1H), 1.48 – 1.36 (m, 1H); <sup>13</sup>C NMR (101 MHz, CDCl<sub>3</sub>) δ 169.87, 145.21, 137.63, 128.36, 128.26, 126.56, 122.71, 55.40, 33.62, 30.41, 23.64, 23.25; ESI-HRMS Calculated for C<sub>14</sub>H<sub>18</sub>NO<sup>+</sup> ([M+H]<sup>+</sup>): 216.1383, found : 216.1382.

## 6. Procedure for the synthesis of compound 3d and hydrogenation of 1d and 1l with low catalyst loading

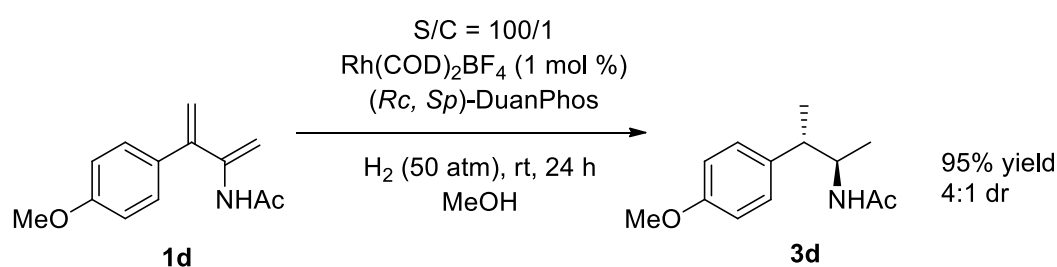

A stock solution was made by mixing [Rh(cod)<sub>2</sub>]BF<sub>4</sub> with (Rc,Sp)-Duanphos in a 1:1.1 molar ratio in CH<sub>2</sub>Cl<sub>2</sub> at room temperature for 30 min in a nitrogen-filled glovebox. An aliquot of the catalyst solution (0.5mL, 0.0005 mmol) was transferred by syringe into the vials charged with different substrates (0.05 mmol for each) in anhydrous MeOH (0.5 mL). The vials were subsequently transferred into an autoclave into which hydrogen gas was charged. The reaction was then stirred under H<sub>2</sub> (50 atm) at room temperature for 24 h. The hydrogen gas was released slowly and carefully. The solution was concentrated and passed through a short column of silica gel (eluent: EtOAc) to yield the desired products. The dr value of the resulting product was determined by <sup>1</sup>H NMR. <sup>1</sup>H NMR (400 MHz, CDCl<sub>3</sub>) δ 7.20 – 7.04 (m, 2H), 6.94 – 6.76 (m, 2H), 5.27 – 4.97 (m, 1H), 4.42 – 4.06 (m, 1H), 3.83 (s, 3H), 3.00 – 2.51 (m, 1H), 1.91 (s, 3H), 1.29 (d, *J* = 7.0 Hz, 3H), 1.10 (d, *J* = 6.7 Hz, 3H). <sup>13</sup>C NMR (101 MHz, CDCl<sub>3</sub>) δ 169.34, 158.24, 134.79, 129.05, 128.81, 113.75, 55.26, 49.60, 43.67, 23.56, 18.88, 17.66.

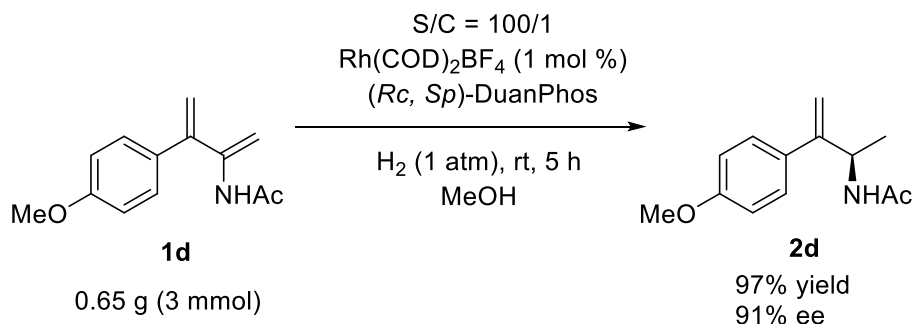

A stock solution was made by mixing [Rh(cod)<sub>2</sub>]BF<sub>4</sub> with (Rc,Sp)-Duanphos in a 1:1.1 molar ratio in CH<sub>2</sub>Cl<sub>2</sub> at room temperature for 30 min in a nitrogen-filled

glovebox. An aliquot of the catalyst solution (0.03 mmol, 1 mol %) was transferred by syringe into the vials charged with **1d** (0.65g, 3 mmol) in anhydrous MeOH (3 mL). The vials were subsequently transferred into an autoclave into which hydrogen gas was charged. The reaction was then stirred under H<sub>2</sub> (1 atm) at room temperature for 5 h. The hydrogen gas was released slowly and carefully. The solution was concentrated and passed through a short column of silica gel (eluent: EtOAc) to yield the desired products **2d** as a white solid.

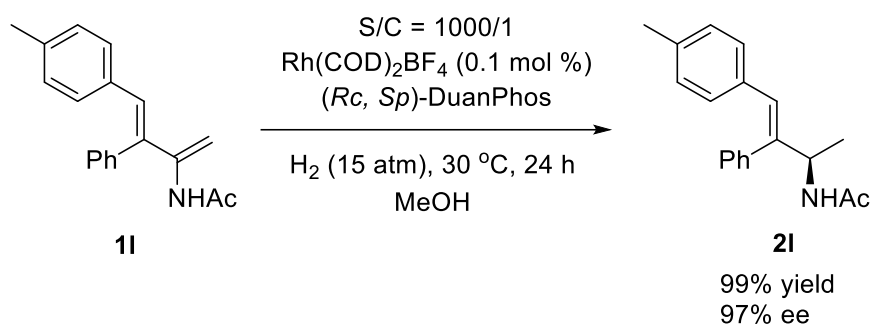

A stock solution was made by mixing [Rh(cod)<sub>2</sub>]BF<sub>4</sub> with (*Rc,Sp*)-Duanphos in a 1:1.1 molar ratio in CH<sub>2</sub>Cl<sub>2</sub> at room temperature for 30 min in a nitrogen-filled glovebox. An aliquot of the catalyst solution (0.0001 mmol, 0.1 mol %) was transferred by syringe into the vials charged with **11** (0.1 mmol) in anhydrous MeOH (1 mL). The vials were subsequently transferred into an autoclave into which hydrogen gas was charged. The reaction was then stirred under H<sub>2</sub> (15 atm) at room temperature for 24 h. The hydrogen gas was released slowly and carefully. The solution was concentrated and passed through a short column of silica gel (eluent: EtOAc) to yield the desired products **21** as a white solid without no loss of yield and ee.

## 7. References

- [1] Li L., Liu Z. P., Lin Y. B., *Chin. J. Org. Chem.*, **2007**; 27, 1244-1249.
- [2] K. V. Tran, D. Bickar, *J. Org. Chem.* **2006**, 71, 6640-6643.
- [3] F. R. Michailidis, K. F. Sedillo, J. M. Neely, T. Rovis, *J. Am. Chem. Soc.* **2015**, 137, 8892-8895.
- [4] J. B. Xie, J. H. Xie, X. Y. Liu, W. L. Kong, S. Li, Q. L. Zhou, *J. Am. Chem. Soc.* **2010**, 132, 4538-4539. S. M. Lu, C. Bolm, *Angew. Chem. Int. Ed.* **2008**, 47, 8920-8923.
- [5] M. J. Burk, G. Casy, N. B. Johnson, *J. Org. Chem.* **1998**, 63, 6084-6085.

## 8. NMR spectra of 1 and 2, HPLC spectra of 2

1a-<sup>1</sup>H NMR and <sup>13</sup>C NMR

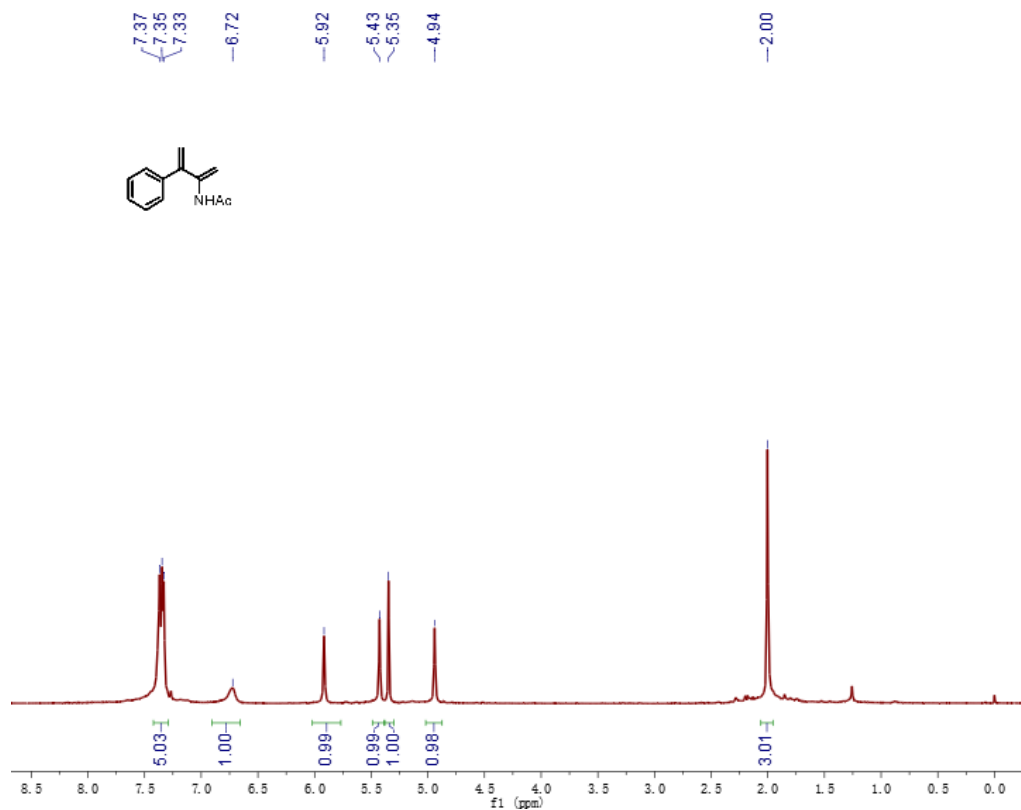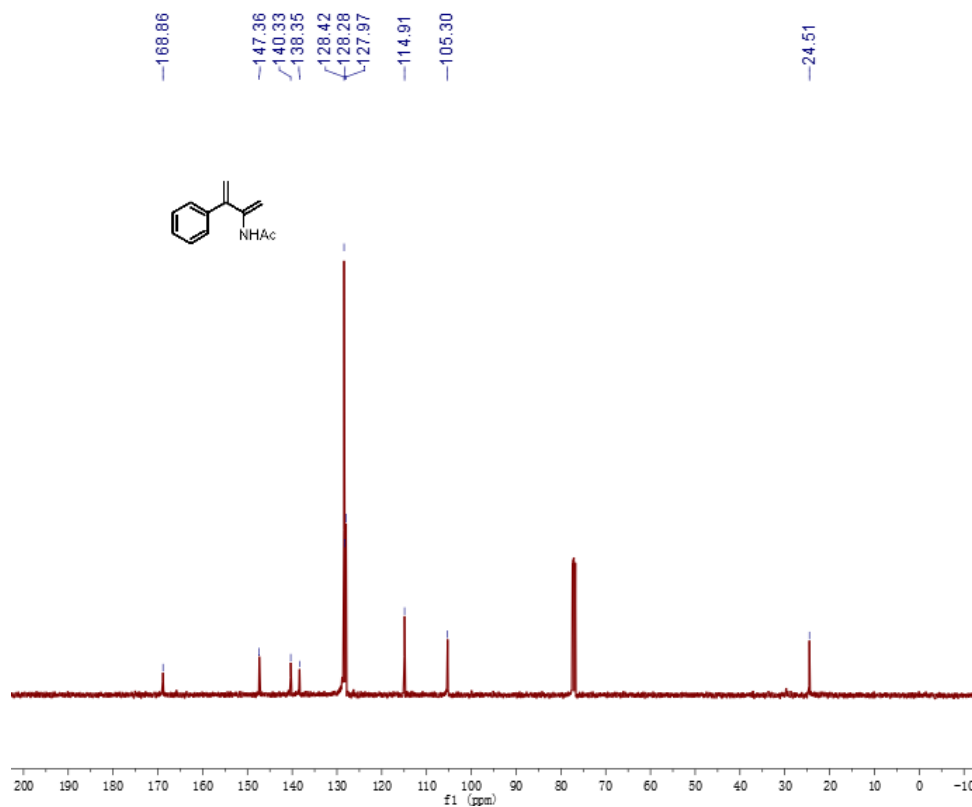



1b-<sup>1</sup>H NMR and <sup>13</sup>C NMR

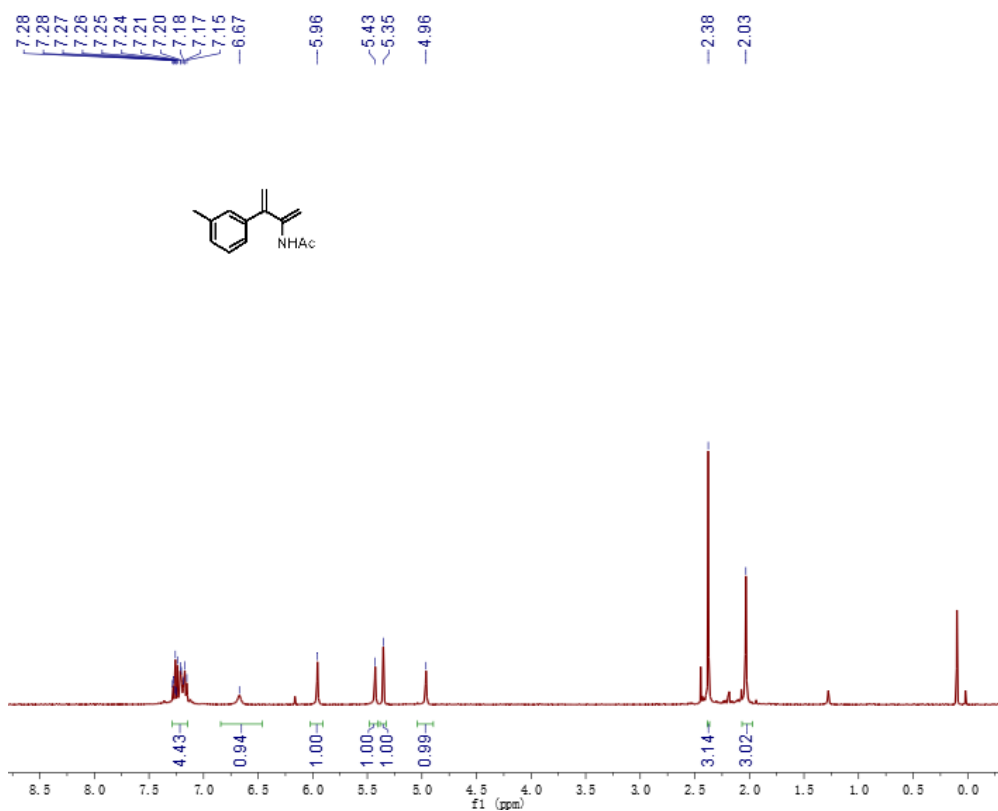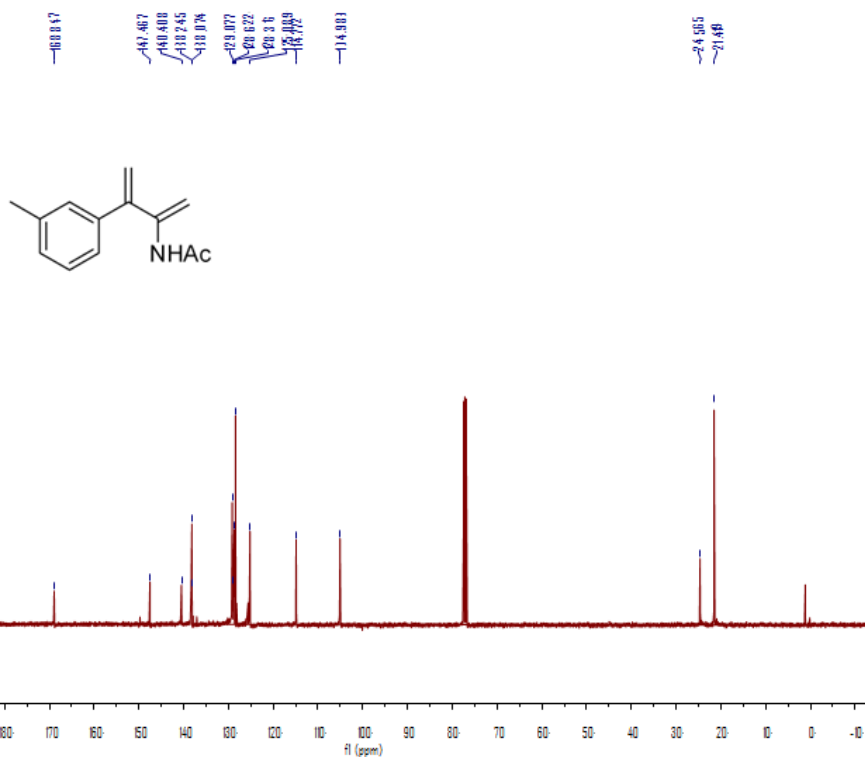

1c-<sup>1</sup>HNMR and <sup>13</sup>C NMR

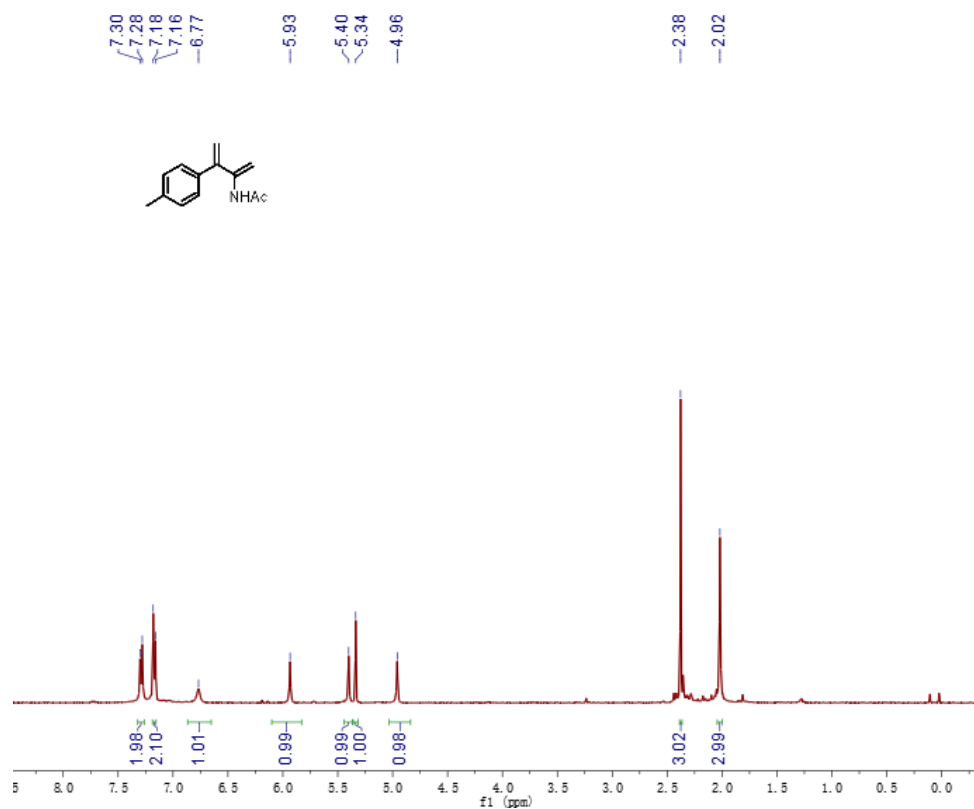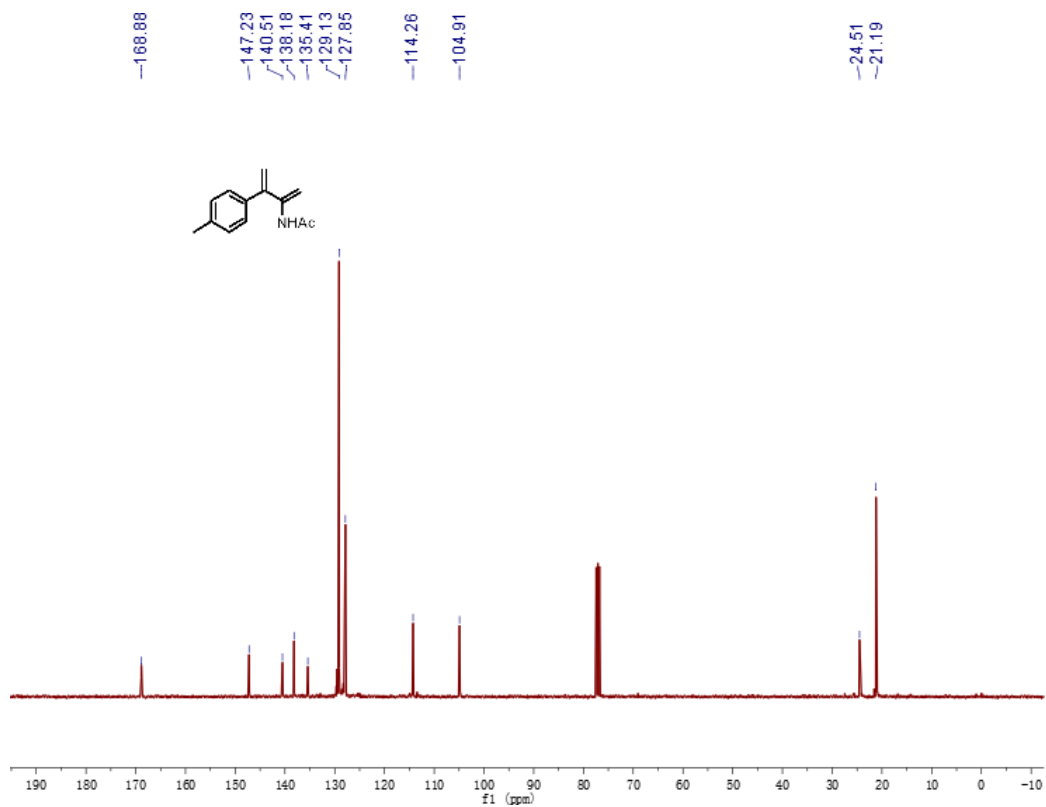

1d-<sup>1</sup>H NMR and <sup>13</sup>C NMR

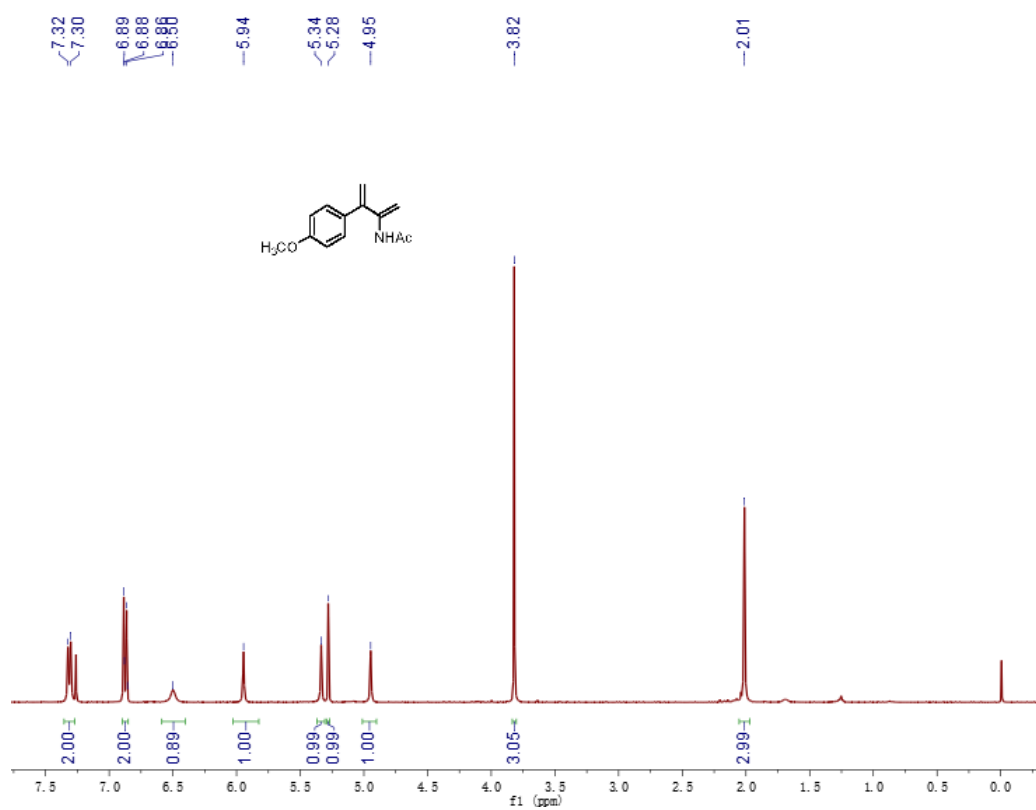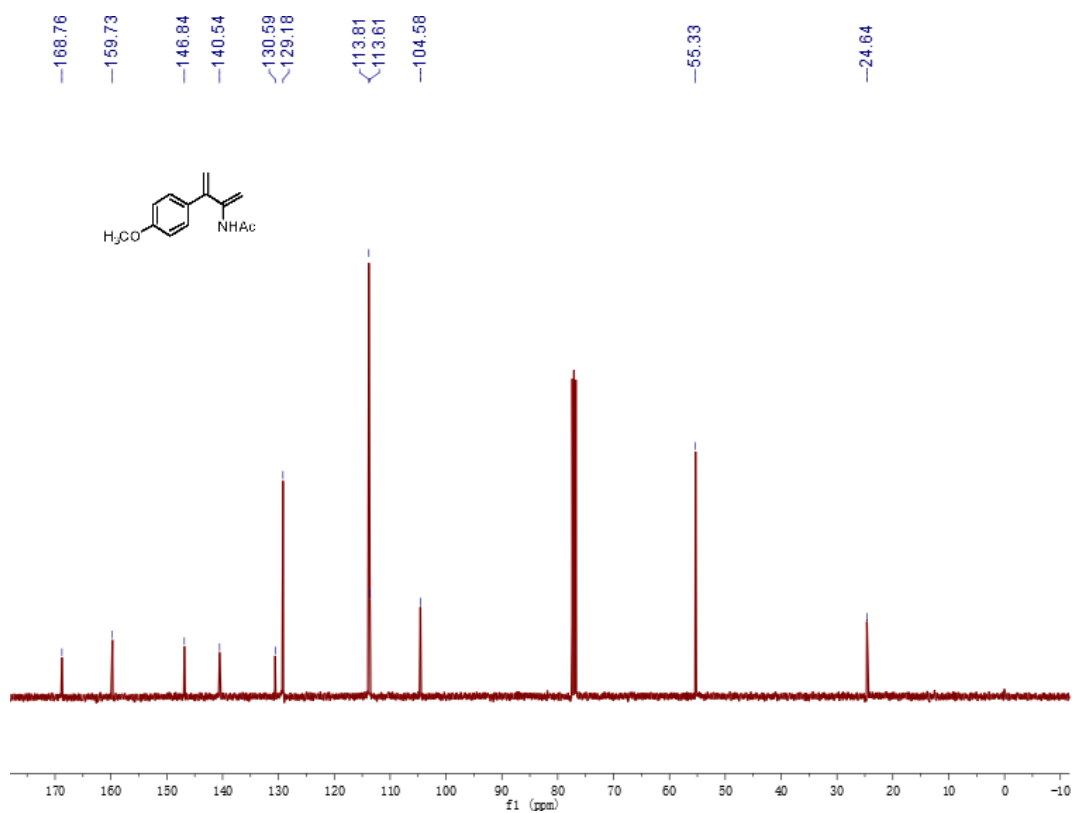

1e-<sup>1</sup>H NMR and <sup>13</sup>C NMR

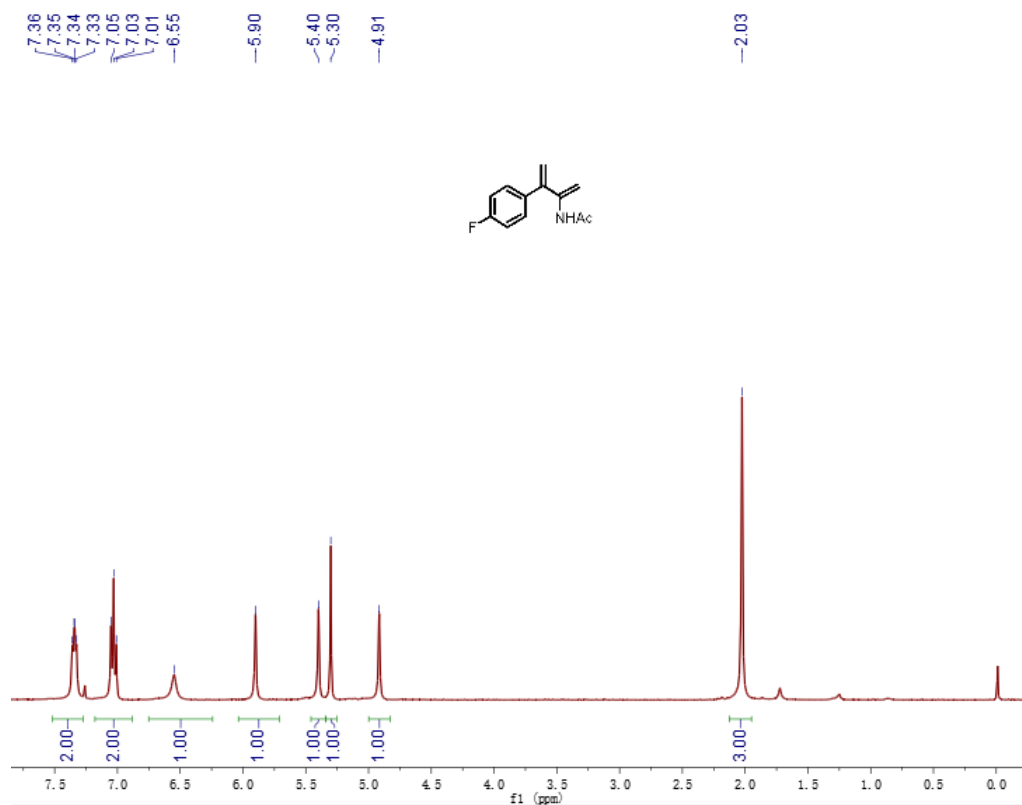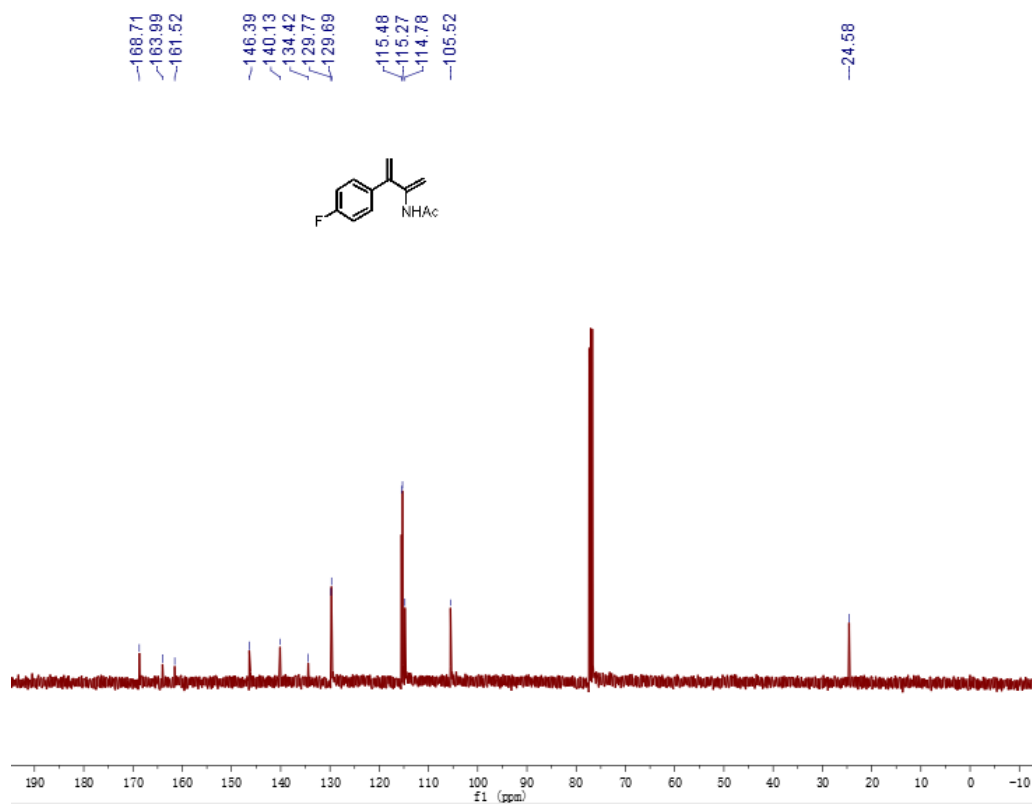

1f-<sup>1</sup>H NMR and <sup>13</sup>C NMR

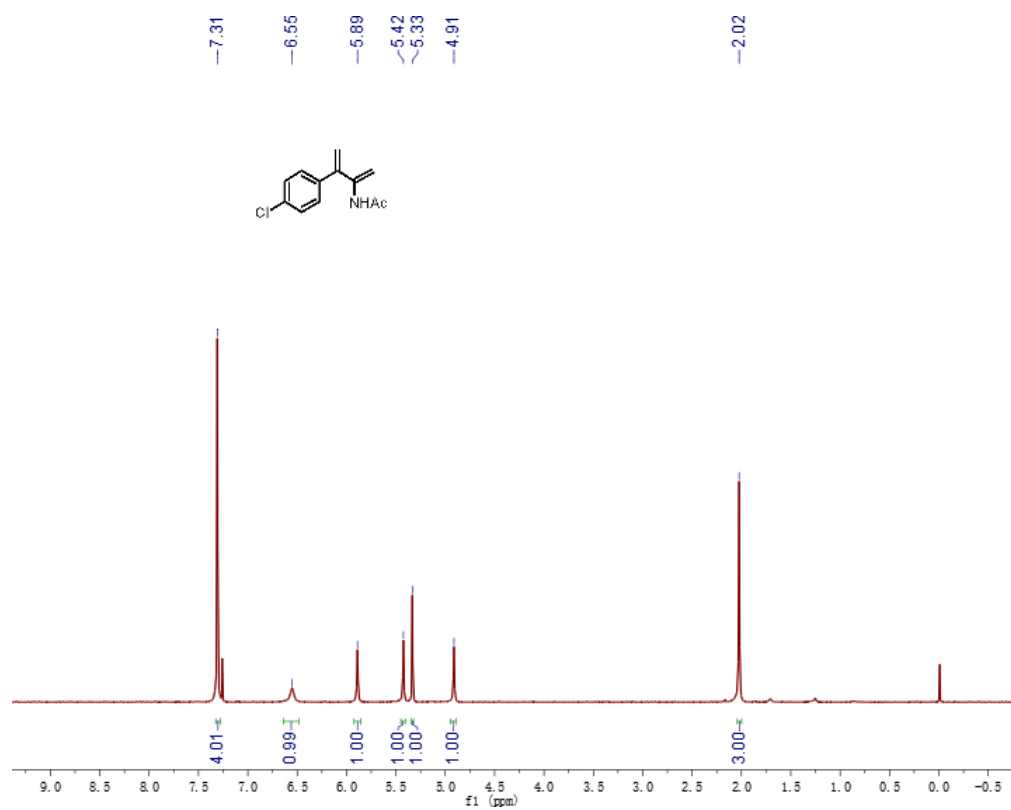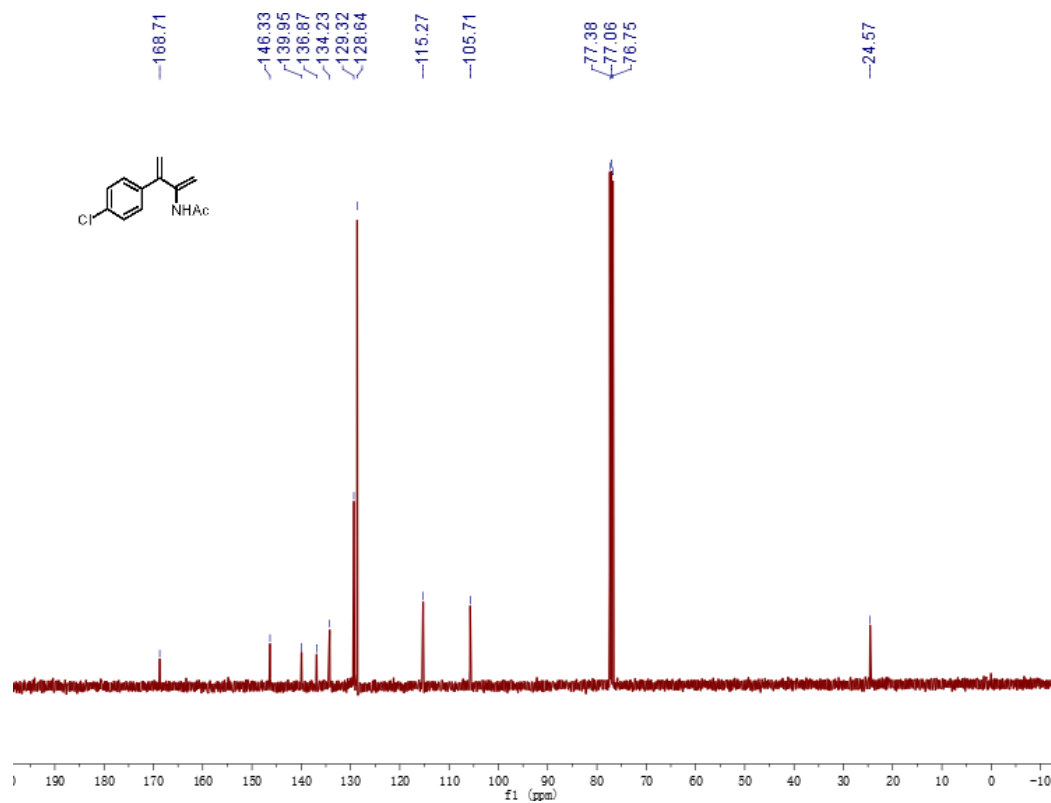

1g-<sup>1</sup>H NMR and <sup>13</sup>C NMR

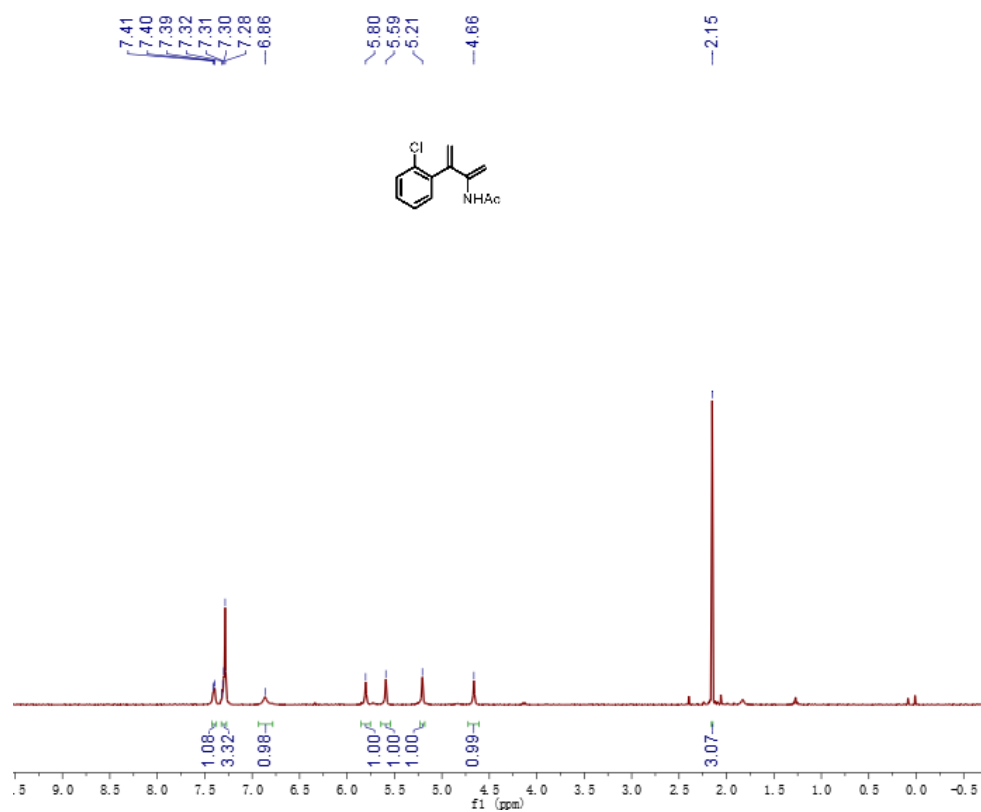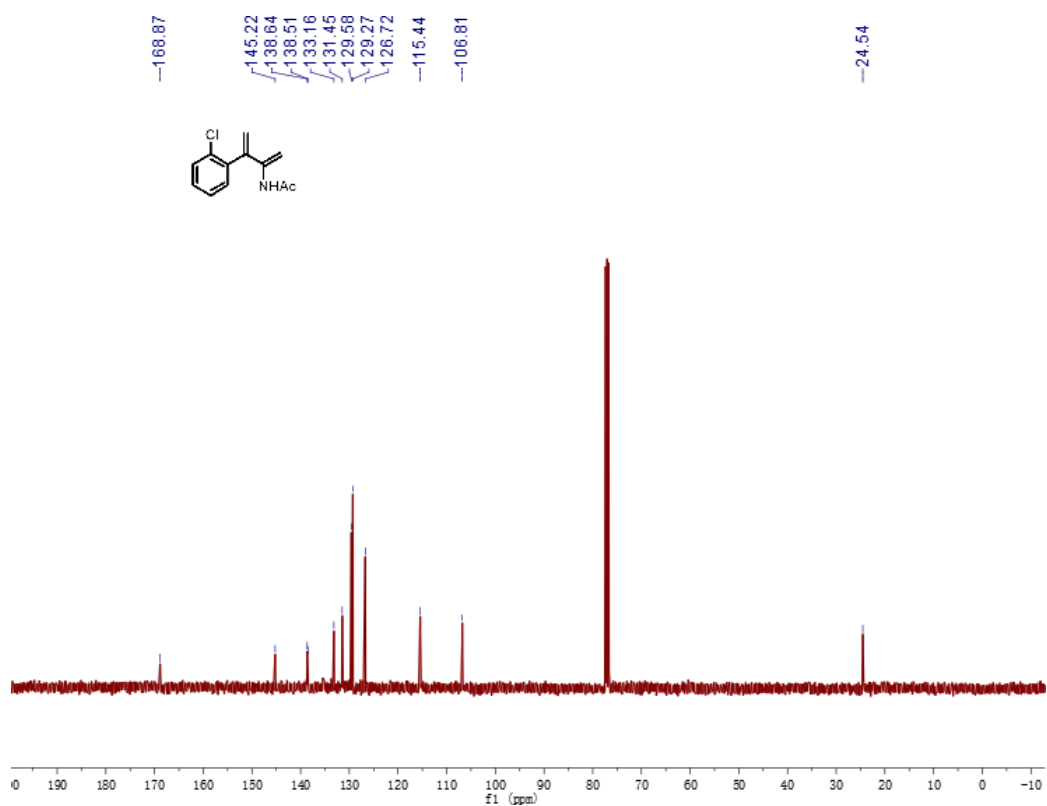

$1\text{H}$ - $^1\text{H}$  NMR and  $^{13}\text{C}$  NMR

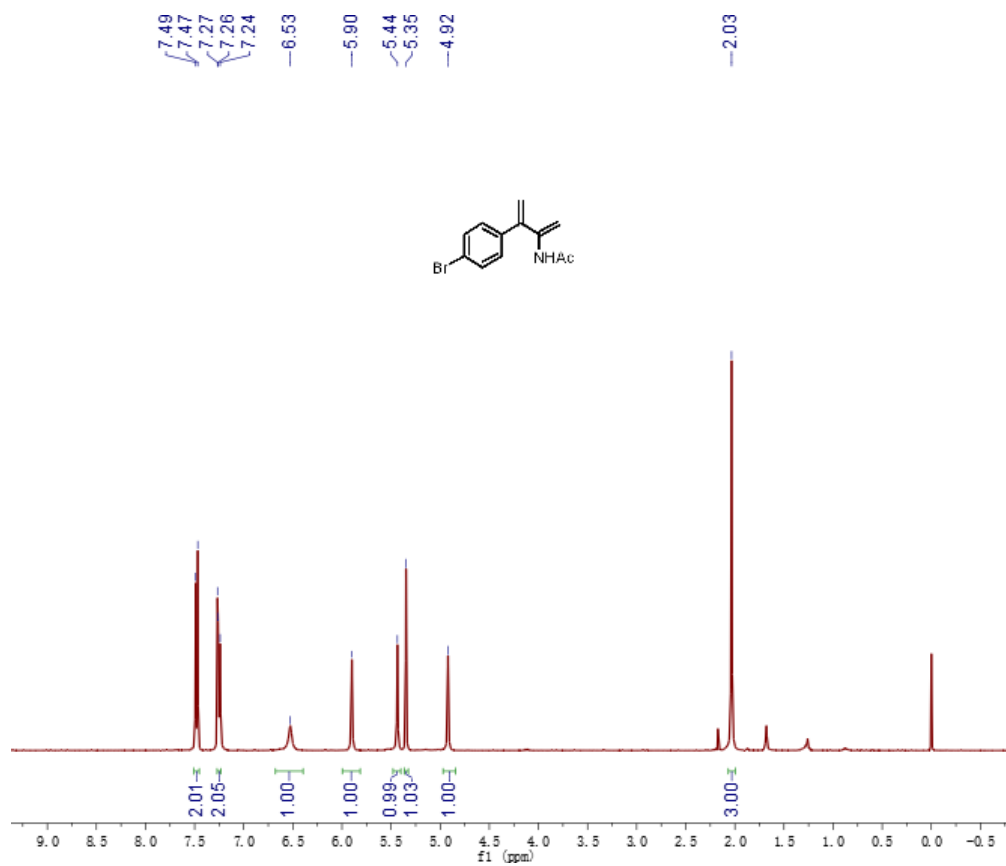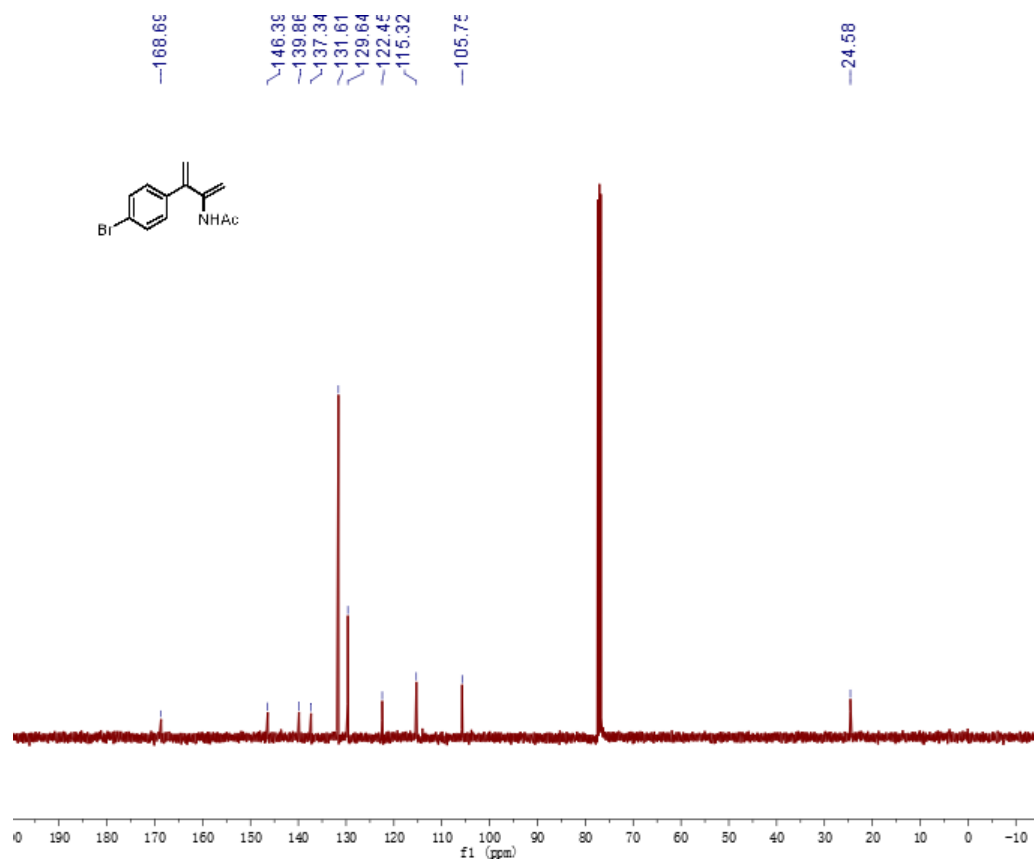

$^1\text{H}$  NMR and  $^{13}\text{C}$  NMR

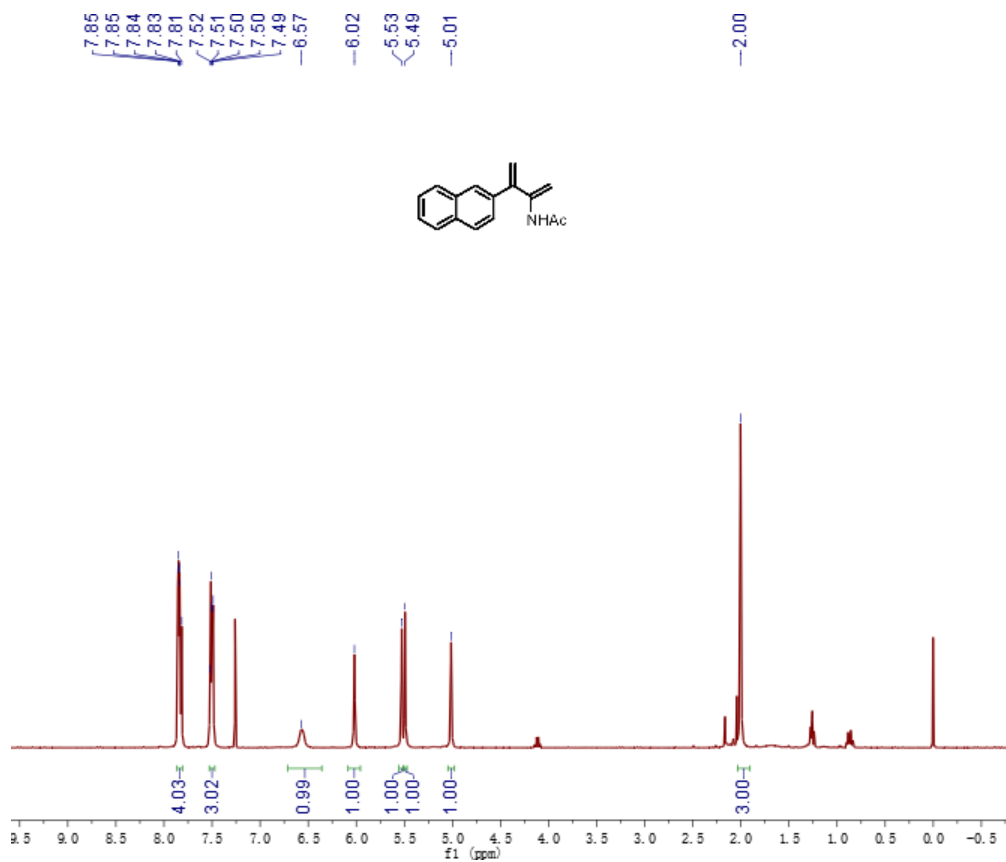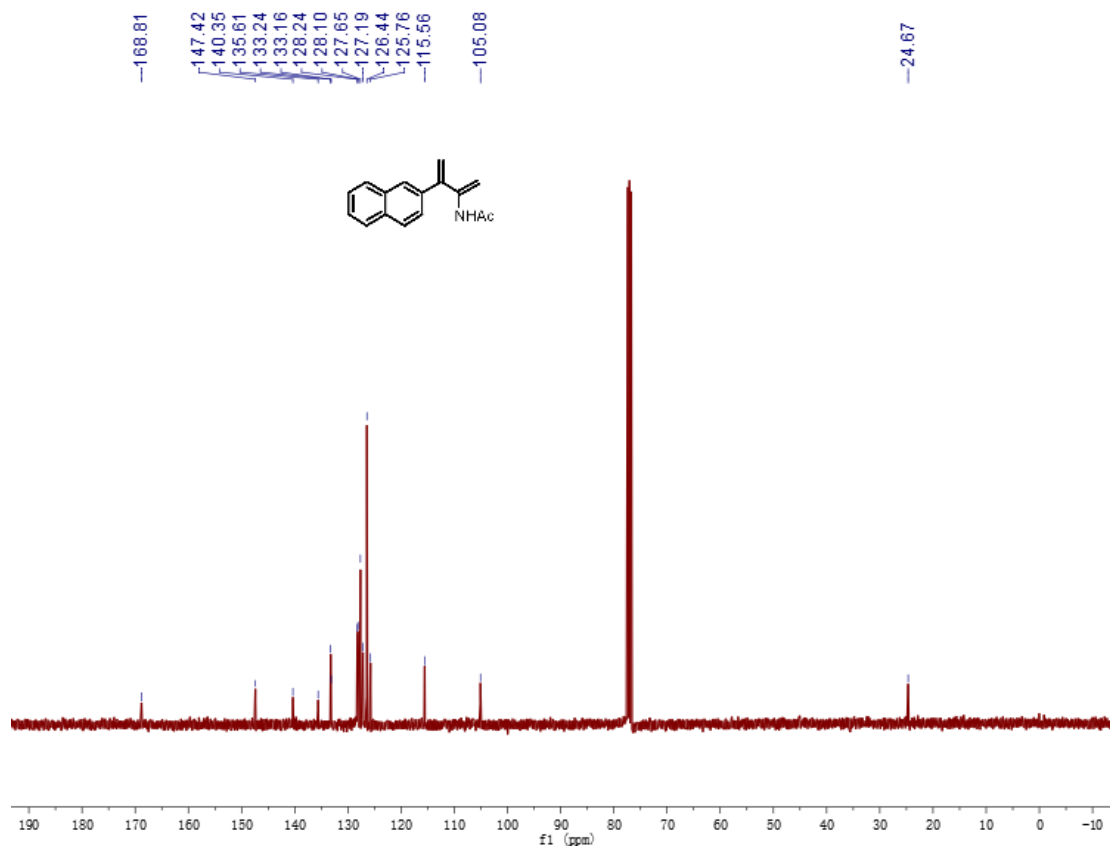



1j-<sup>1</sup>H NMR and <sup>13</sup>C NMR

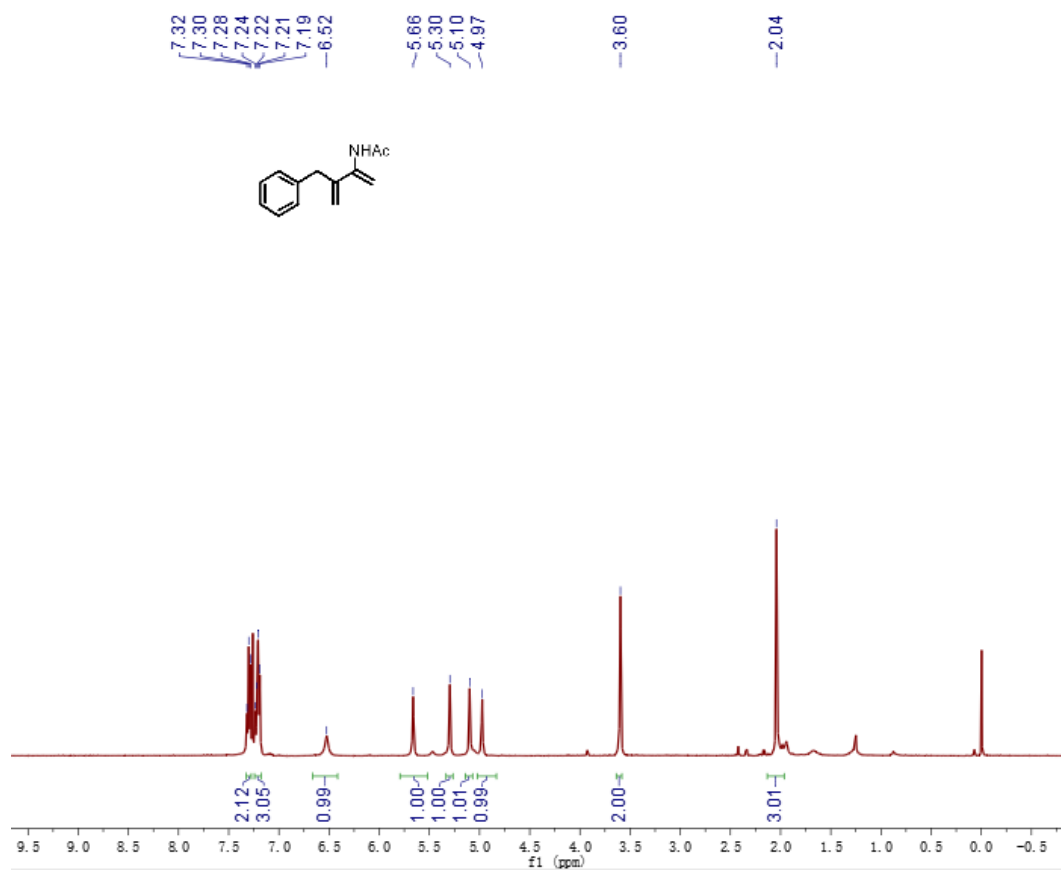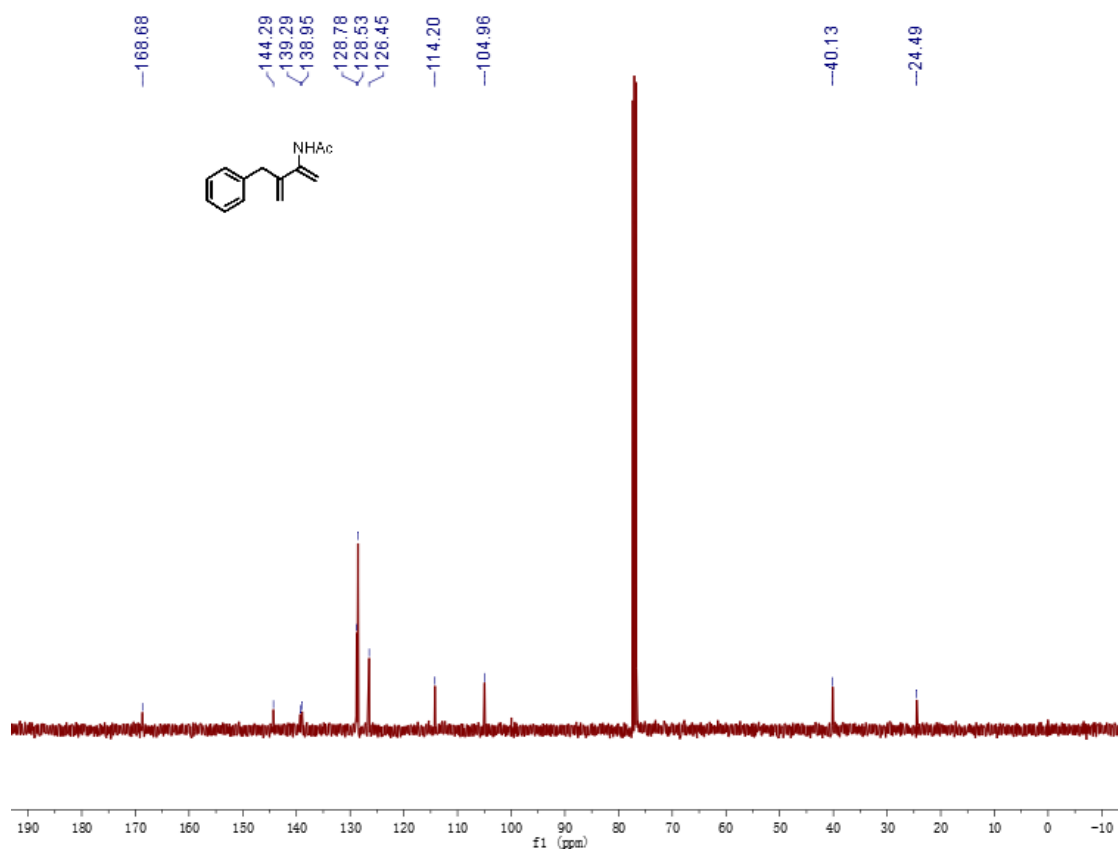

1k-<sup>1</sup>H NMR and <sup>13</sup>C NMR

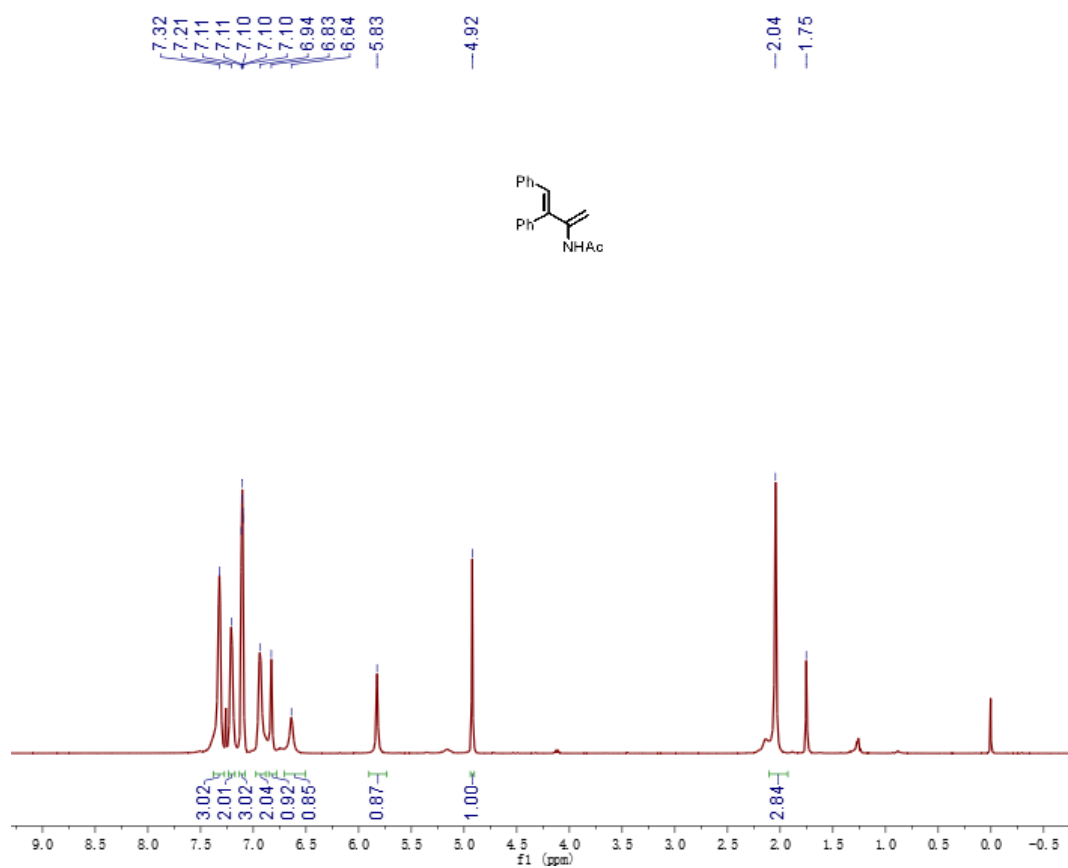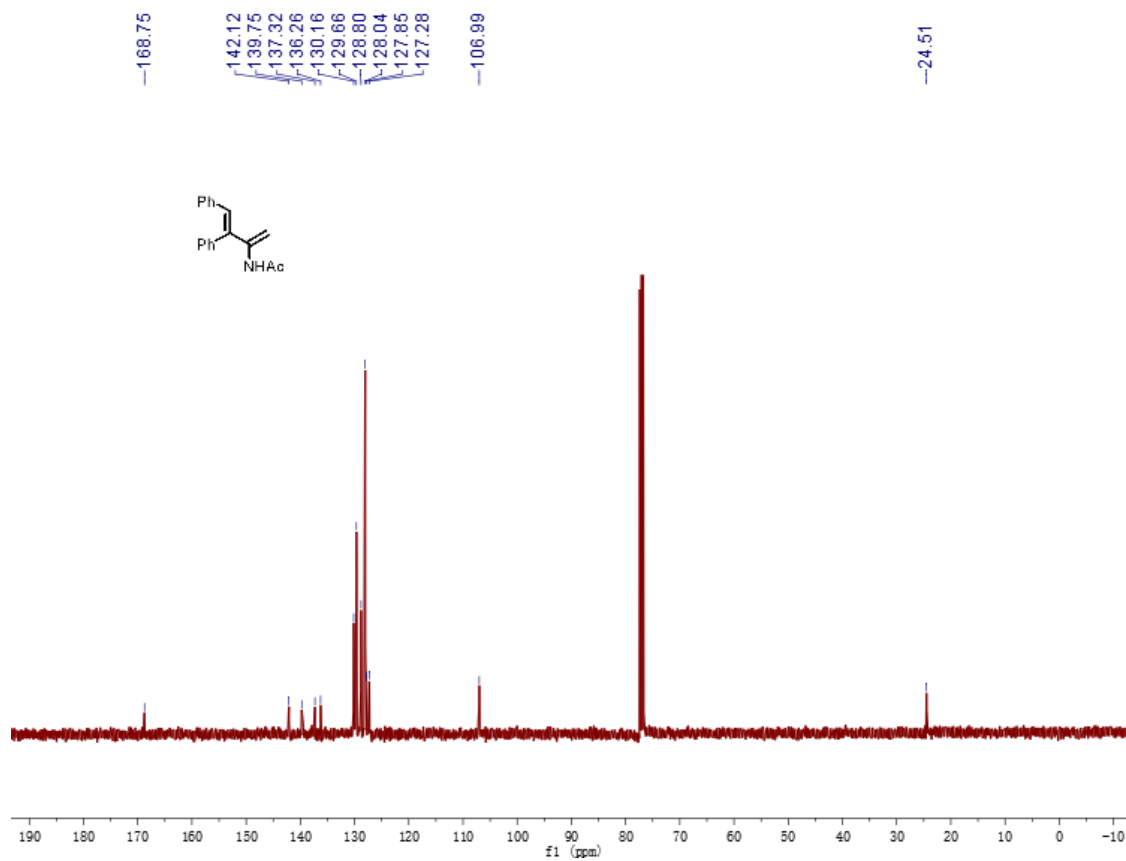

# $^1\text{H}$ NMR and $^{13}\text{C}$ NMR

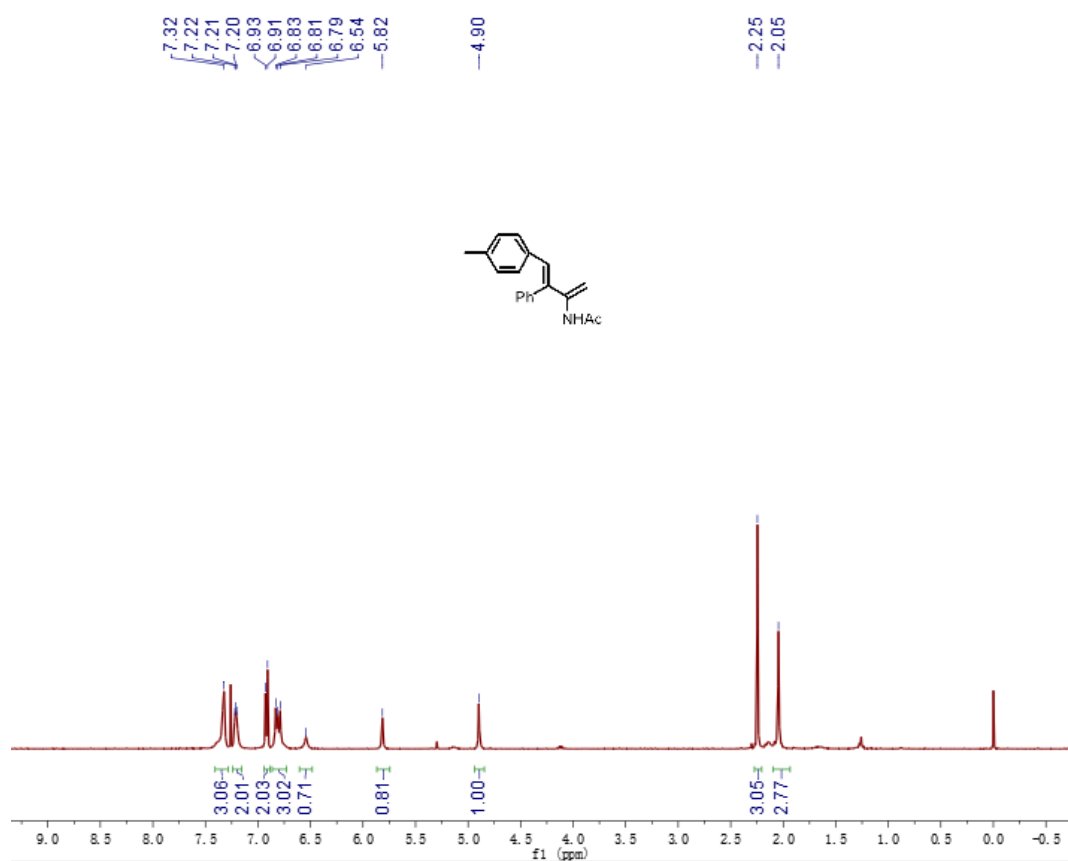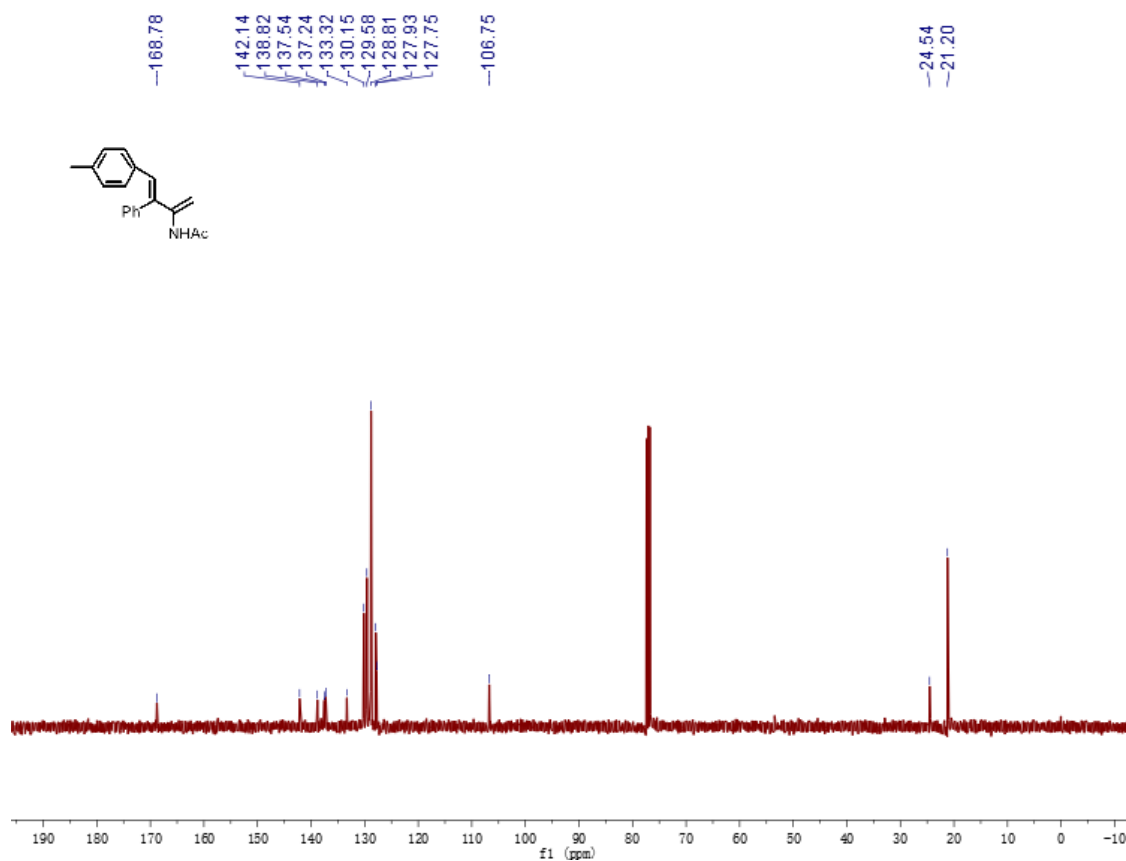

# 1m-<sup>1</sup>H NMR and <sup>13</sup>C NMR

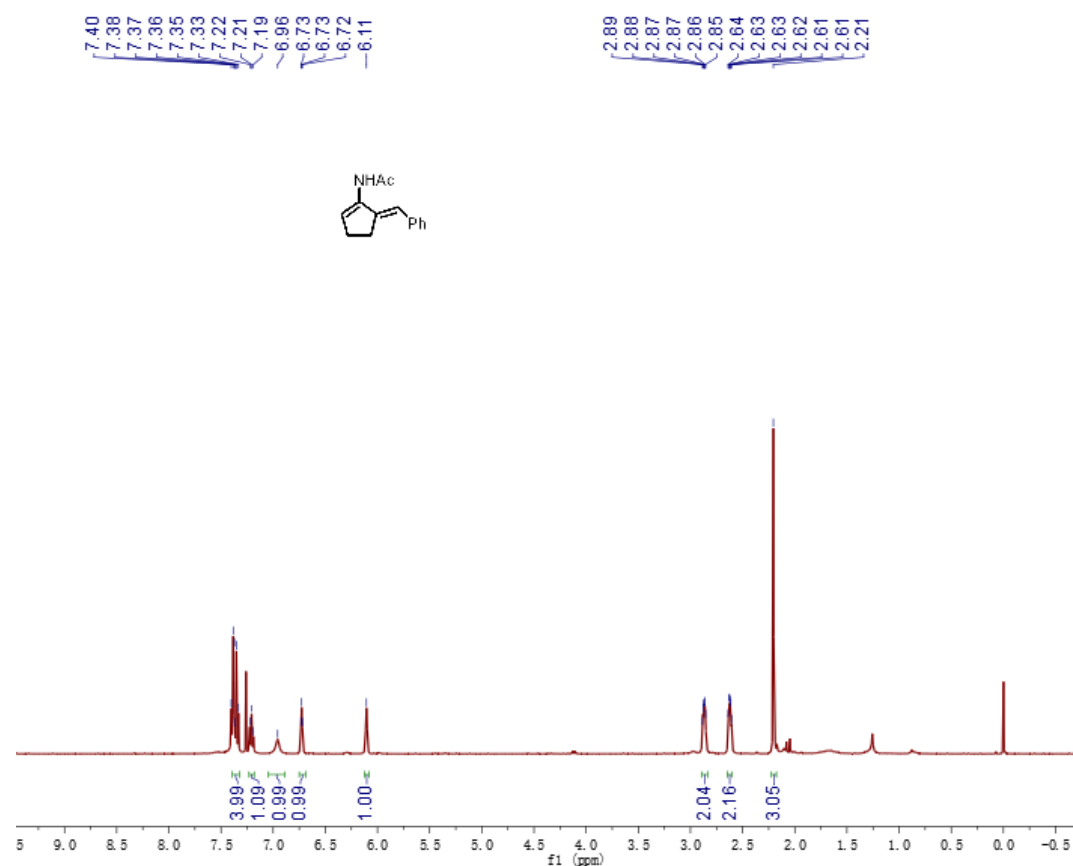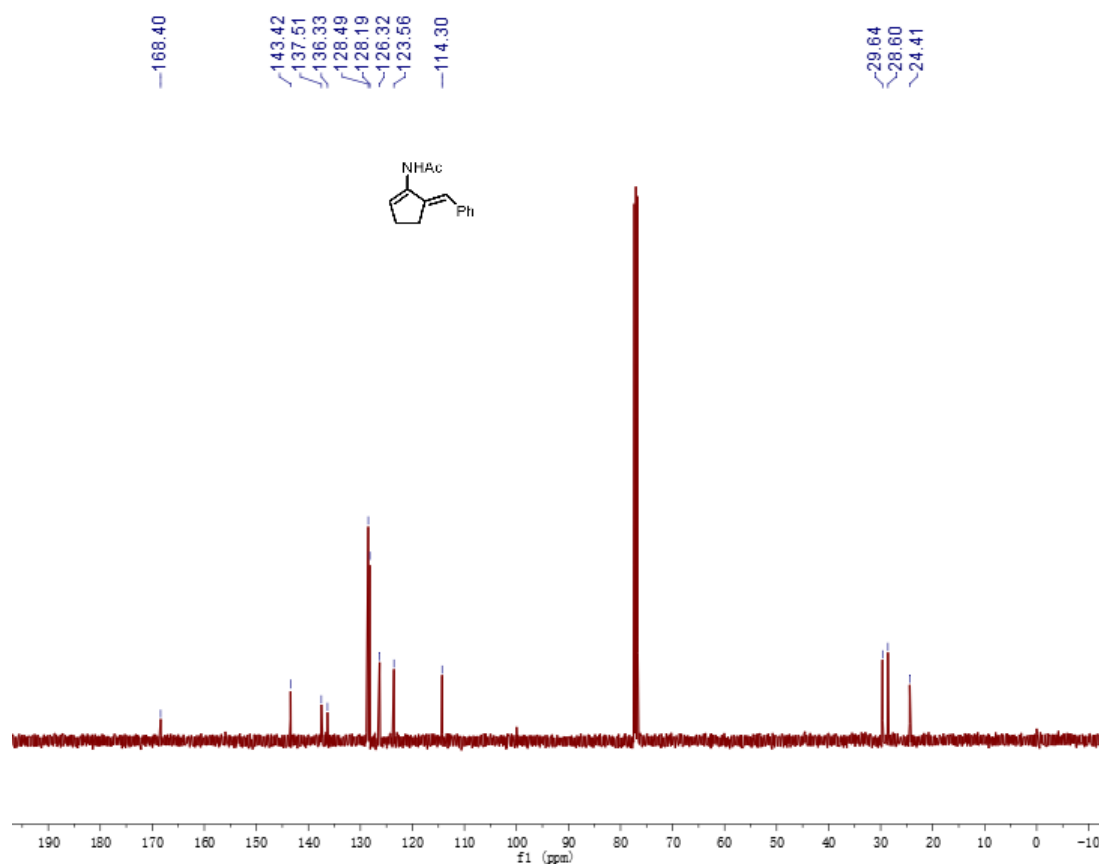

2a-<sup>1</sup>H NMR and <sup>13</sup>C NMR

7.43  
7.42  
7.42  
7.41  
7.40  
7.37  
7.36  
7.35  
7.33  
7.33  
7.32  
7.32  
7.31  
7.30  
6.69  
5.34  
5.24  
5.24  
5.16  
5.14  
5.12  
5.10  
5.08

-1.96  
1.34  
1.32

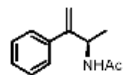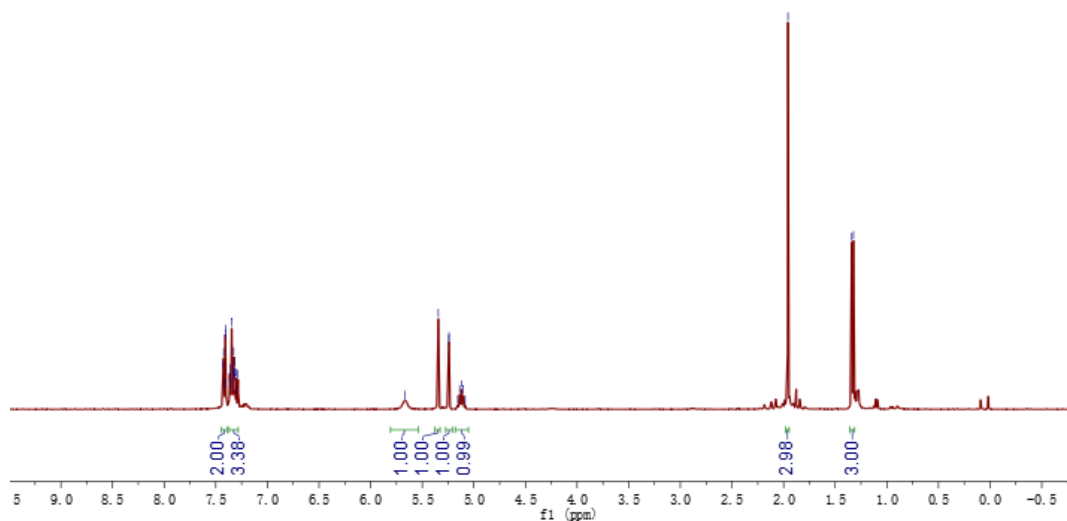

-169.19  
-150.48  
-139.90  
-128.37  
-127.78  
-126.65  
-112.19

-47.47  
-23.39  
-20.31

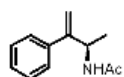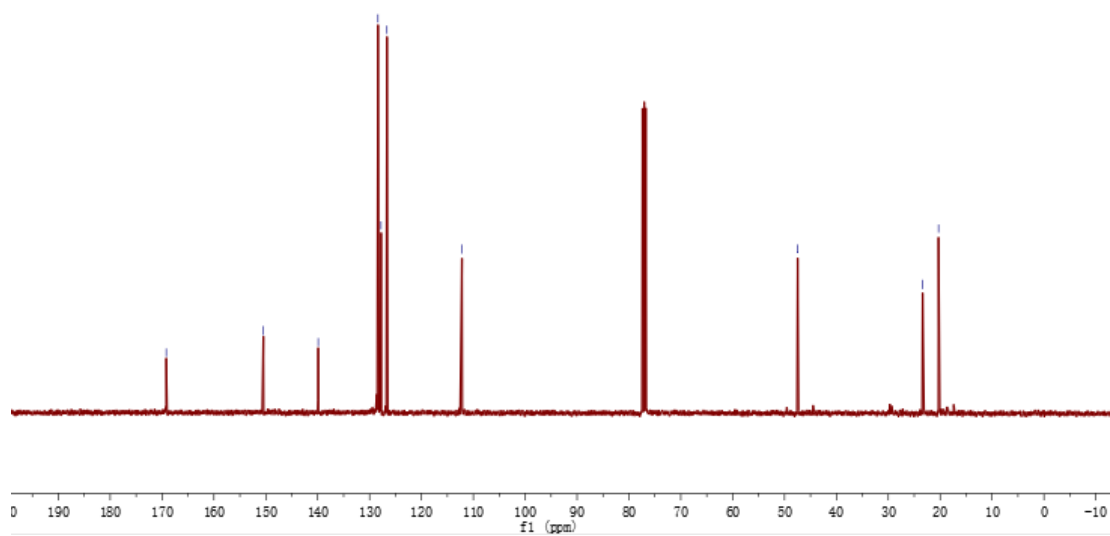

2b -  $^1\text{H}$  NMR and  $^{13}\text{C}$  NMR

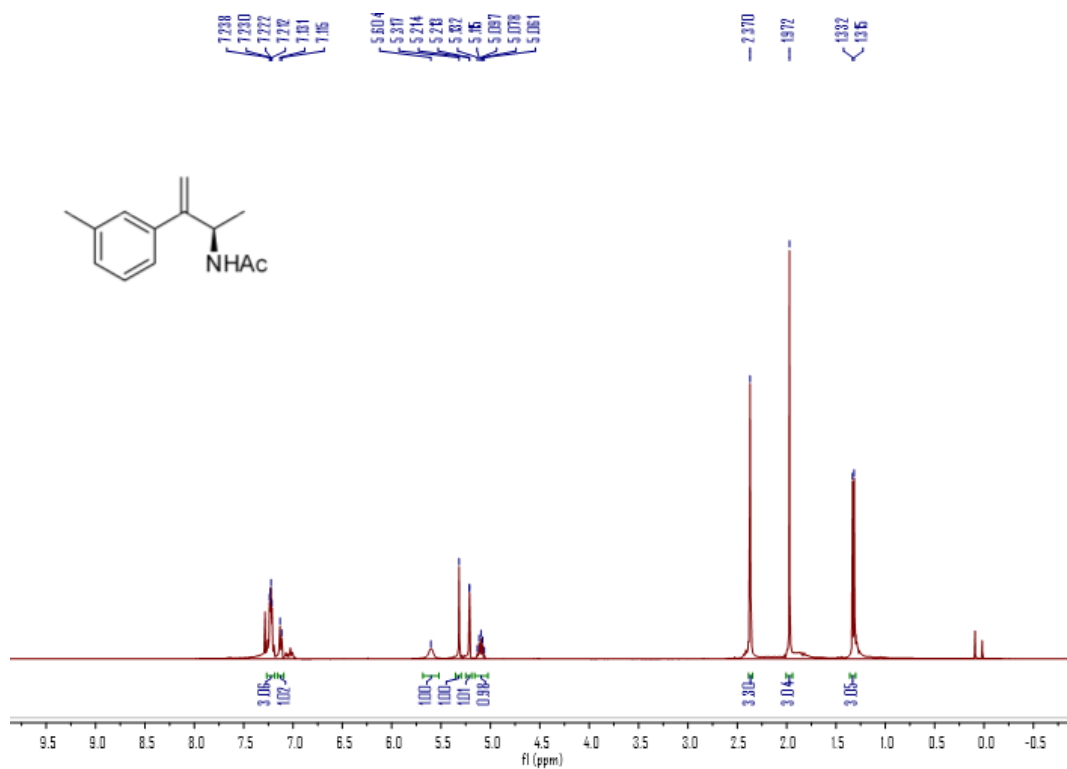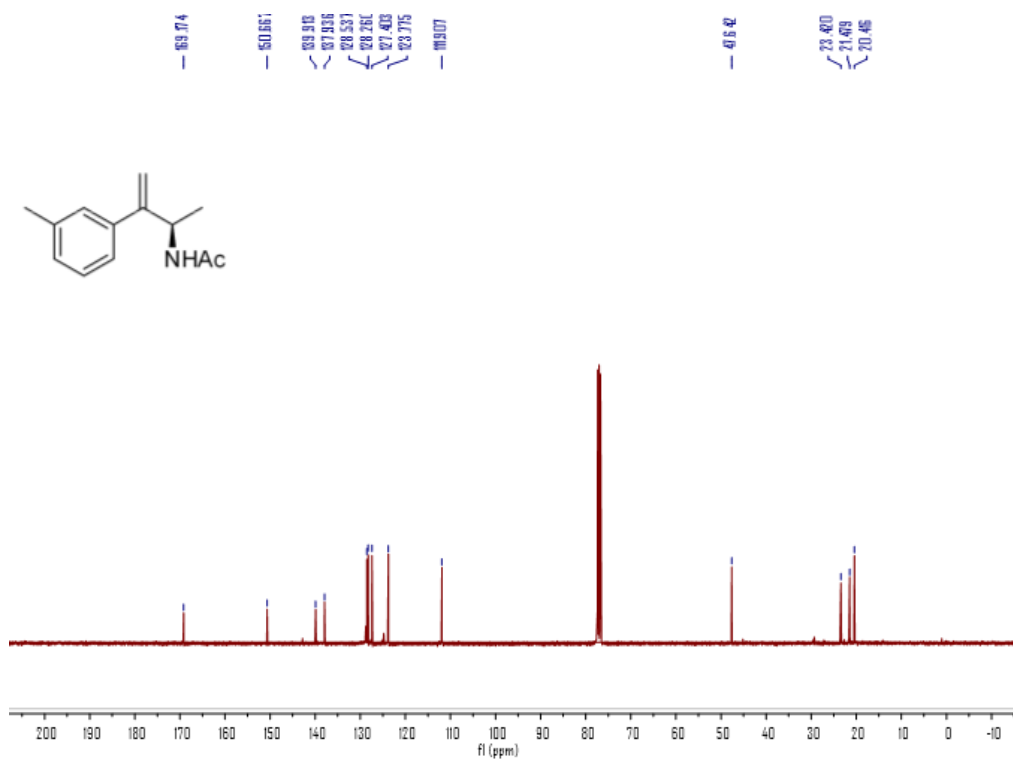

2c -  $^1\text{H}$  NMR and  $^{13}\text{C}$  NMR

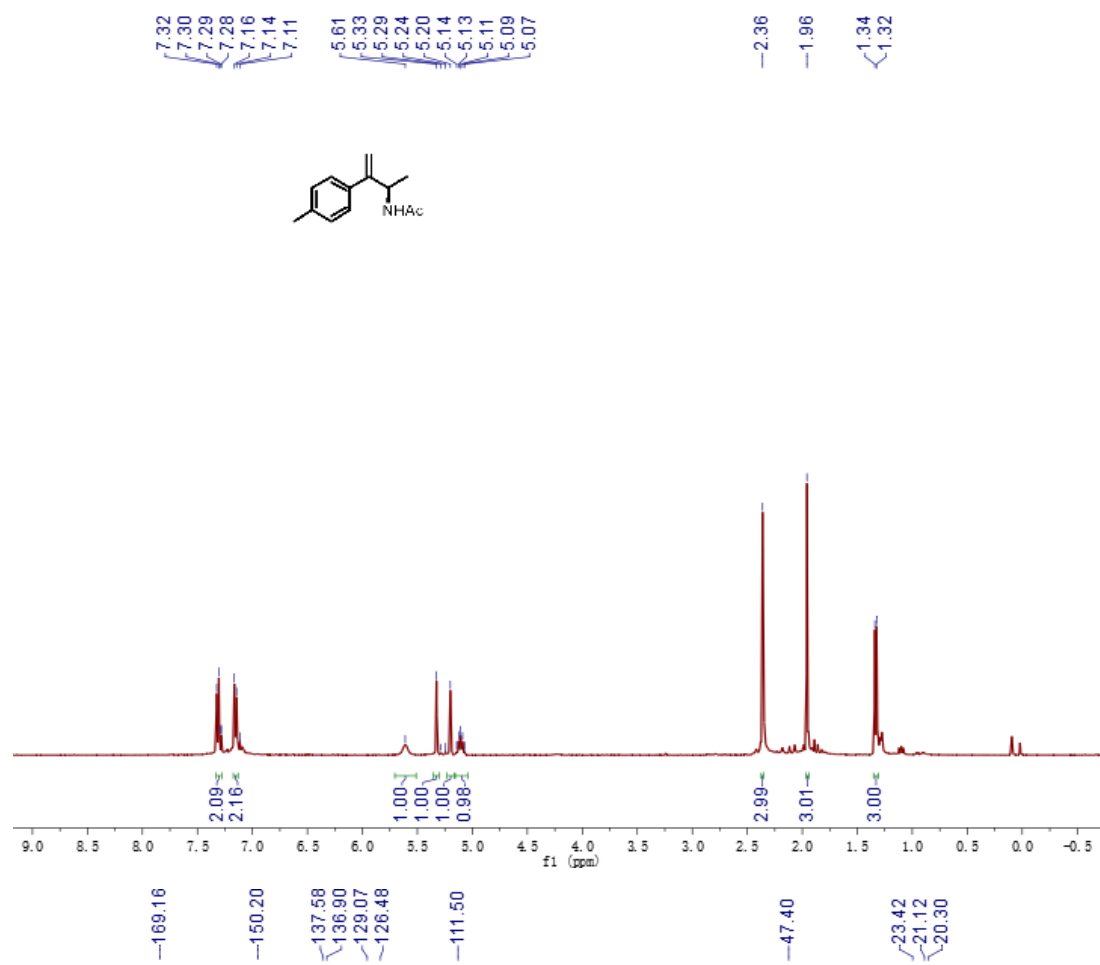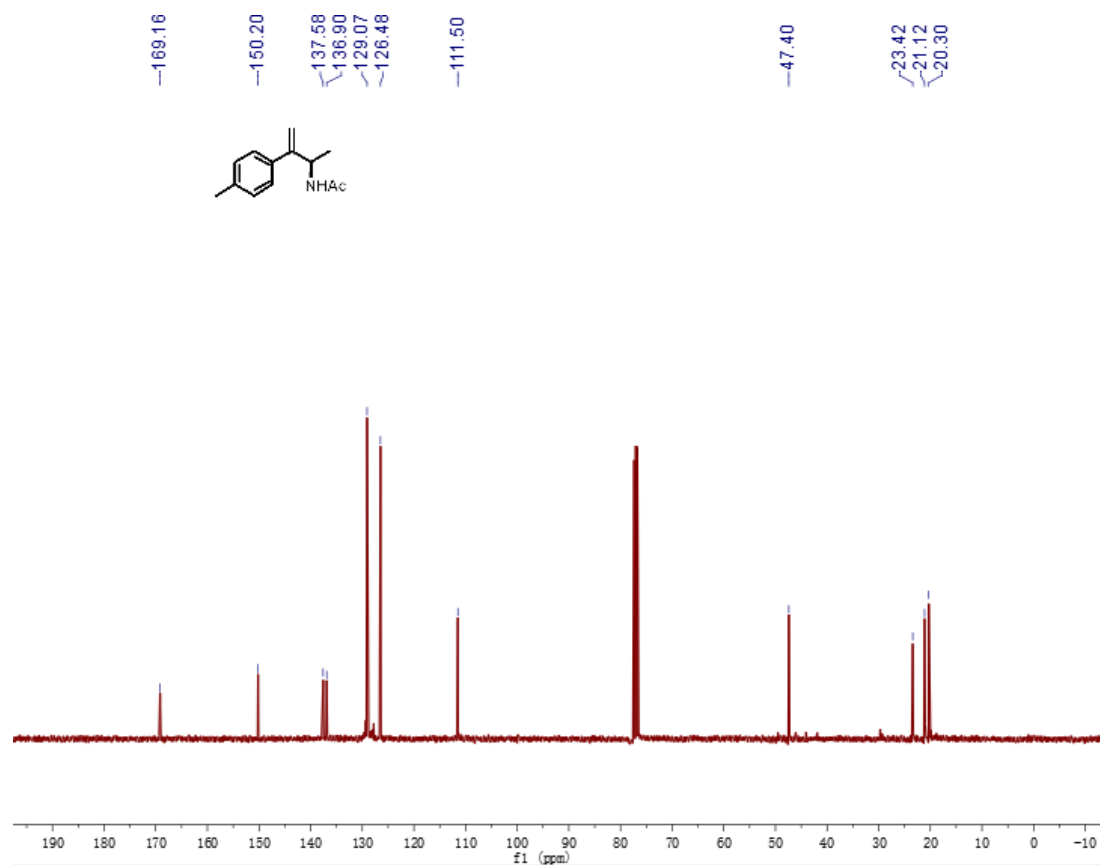

2d -  $^1\text{H}$  NMR and  $^{13}\text{C}$  NMR

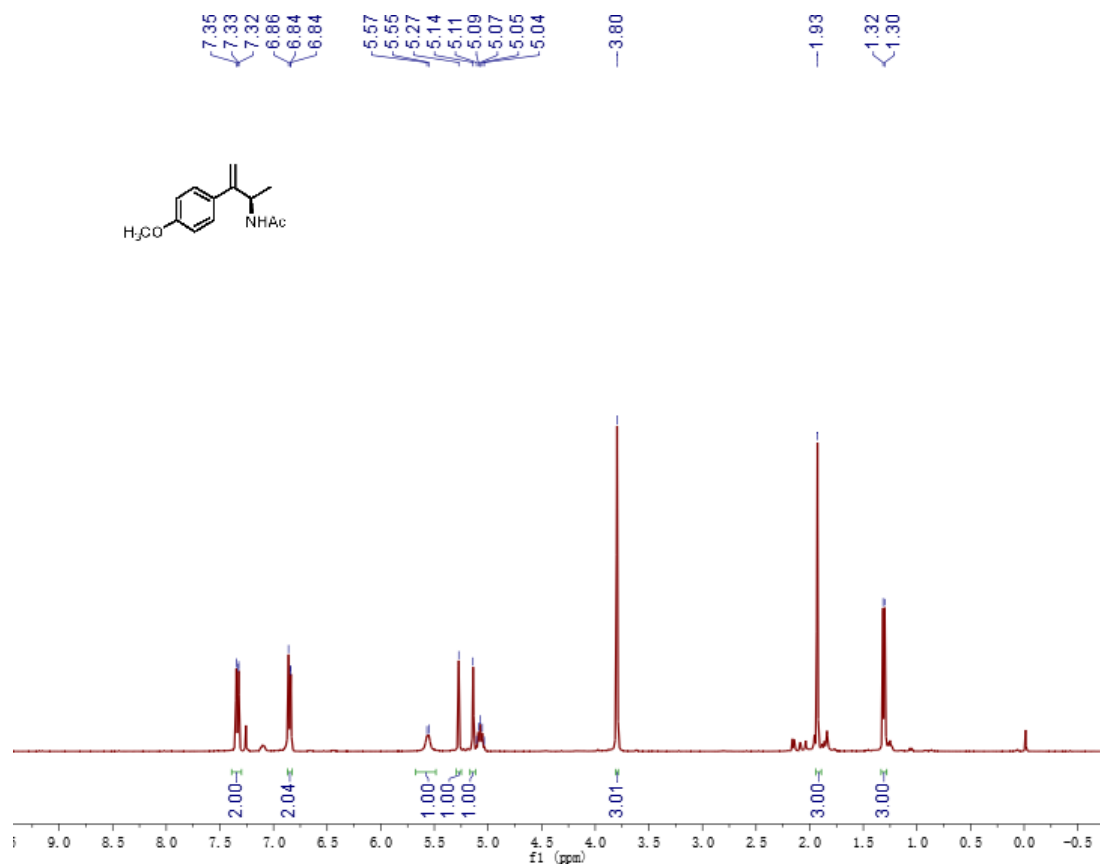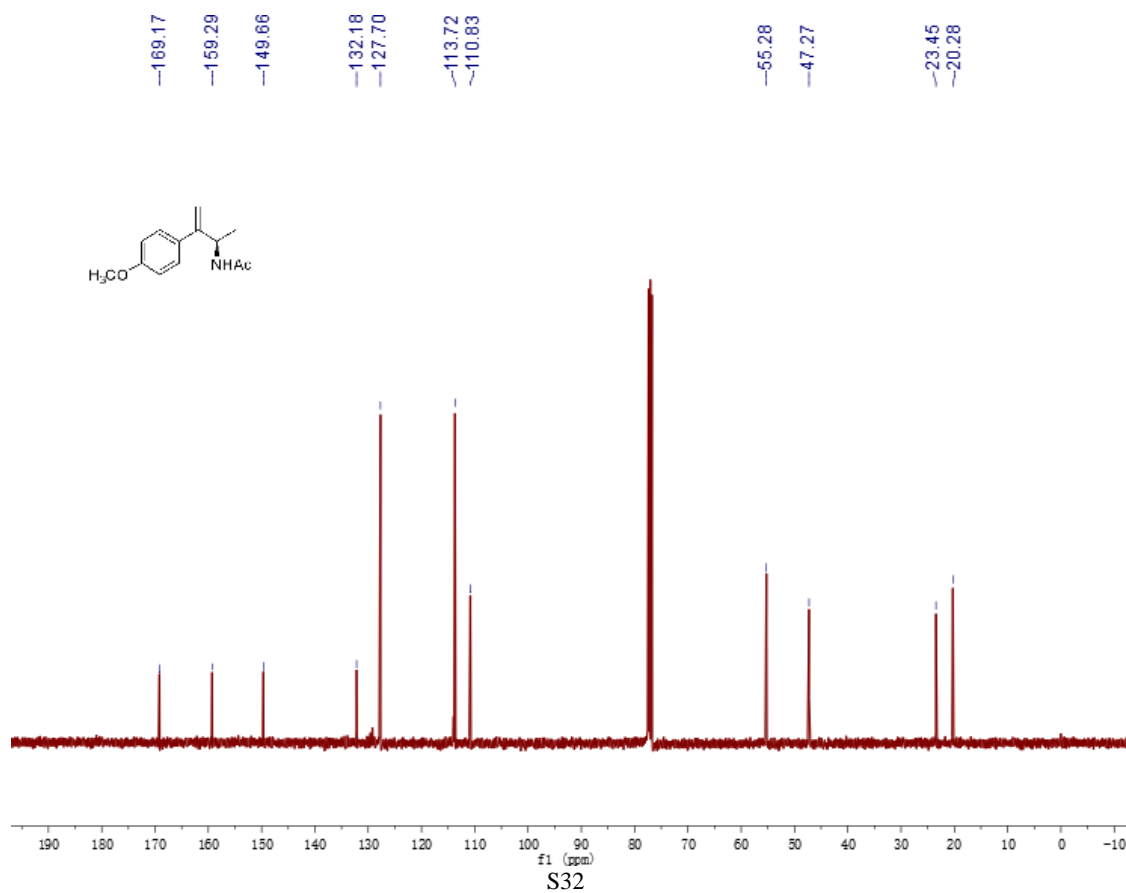



2e -  $^1\text{H}$  NMR and  $^{13}\text{C}$  NMR

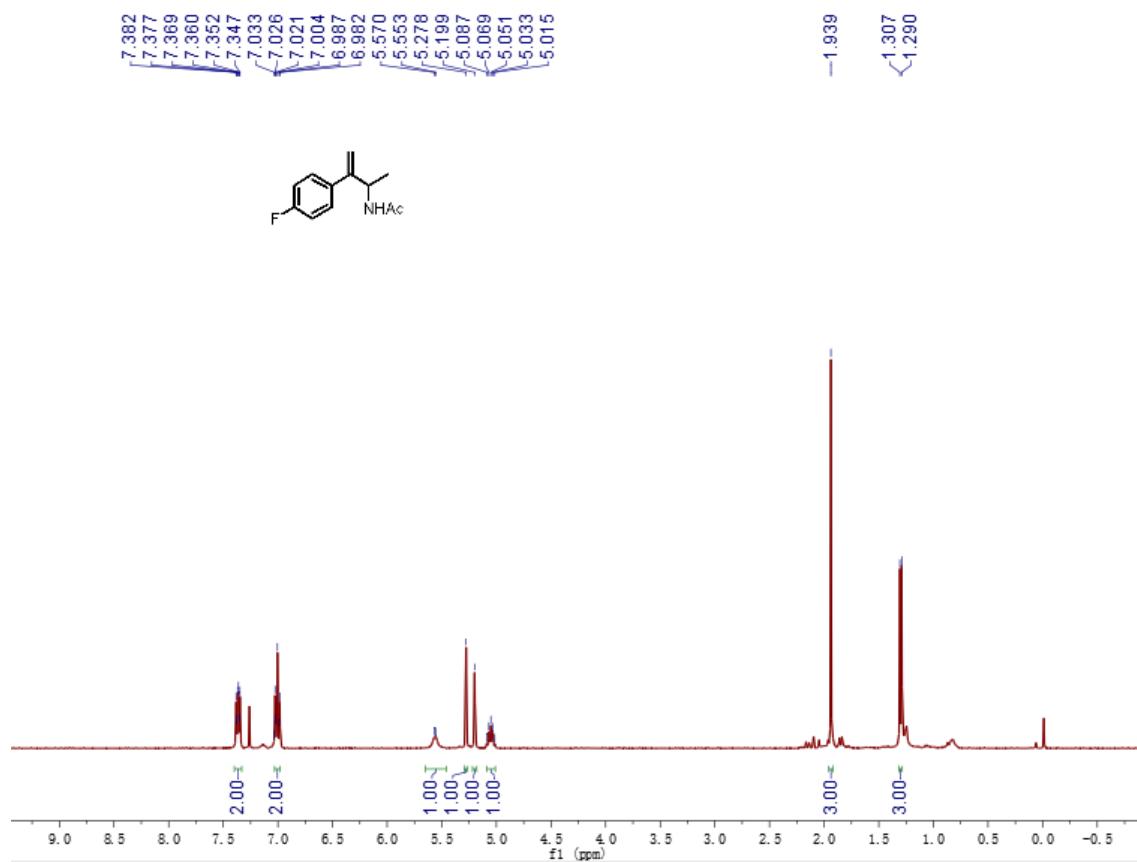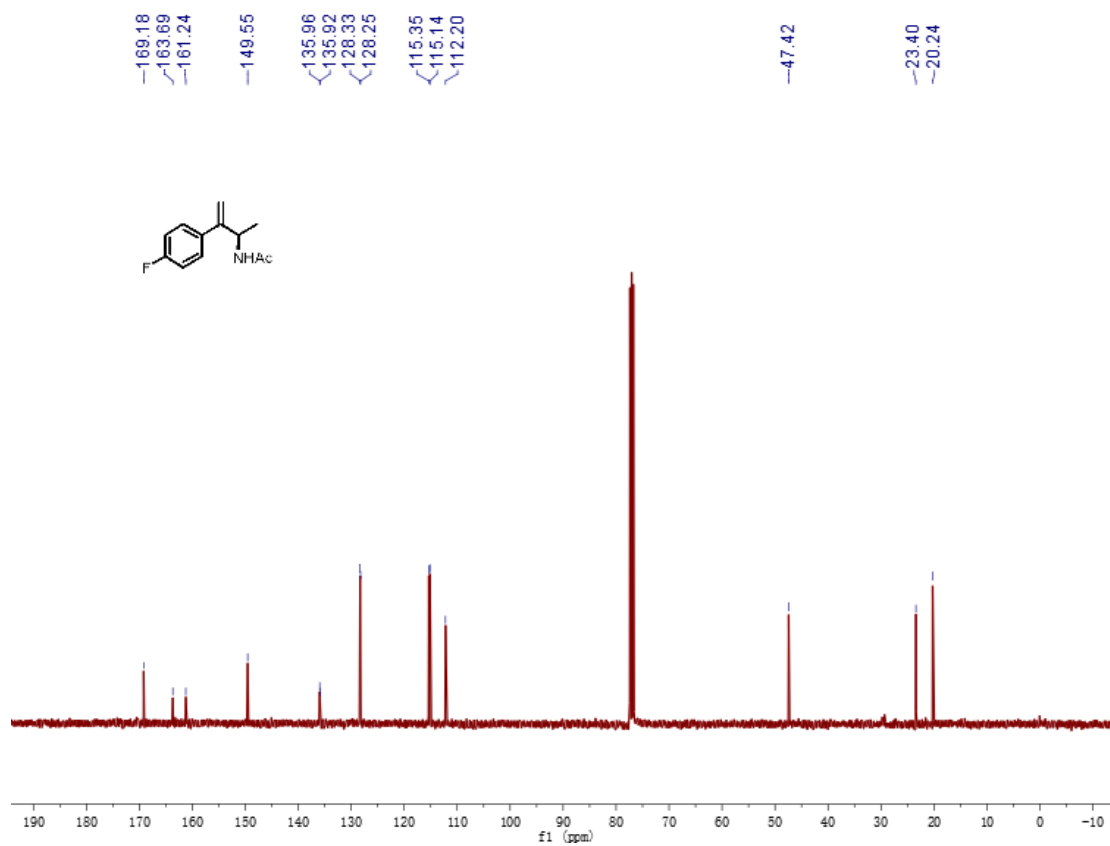

2f -  $^1\text{H}$  NMR and  $^{13}\text{C}$  NMR

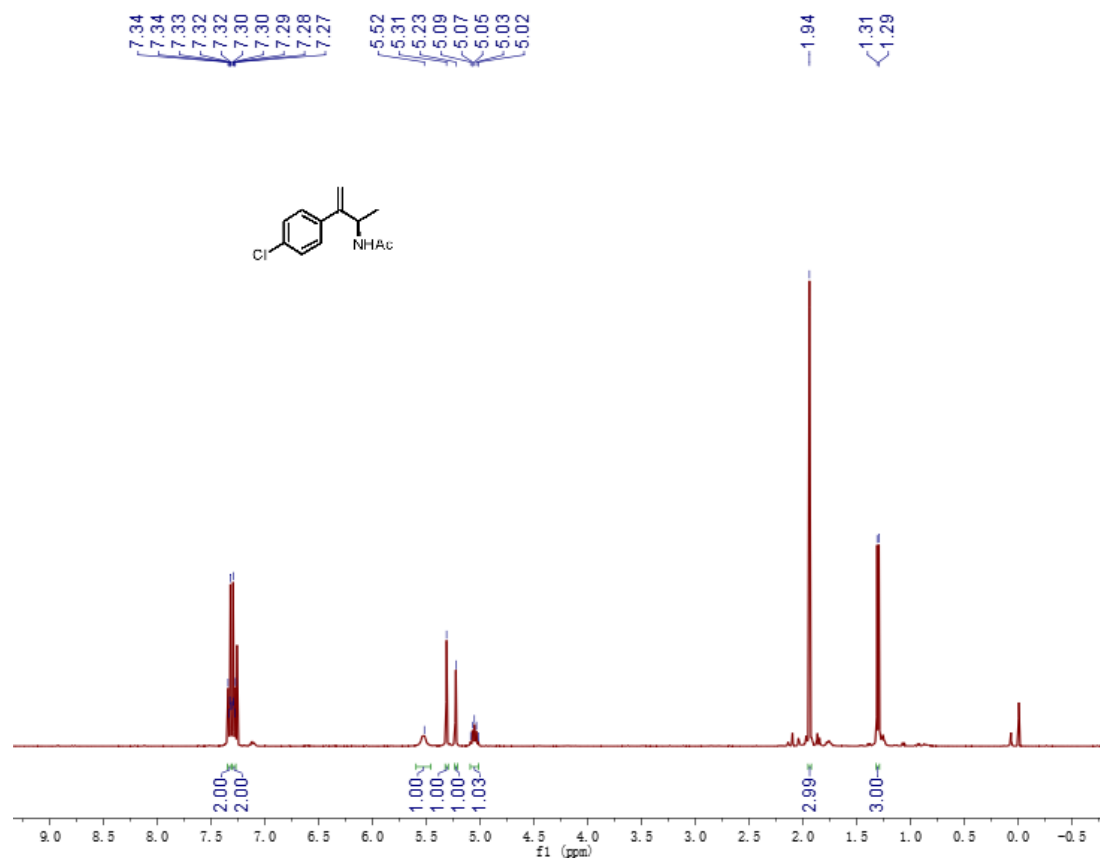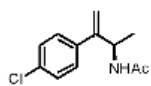

Chemical shifts (ppm): -189.18, -149.46, -138.34, -133.64, -128.55, -127.97, -112.68, -47.25, -23.40, -20.22

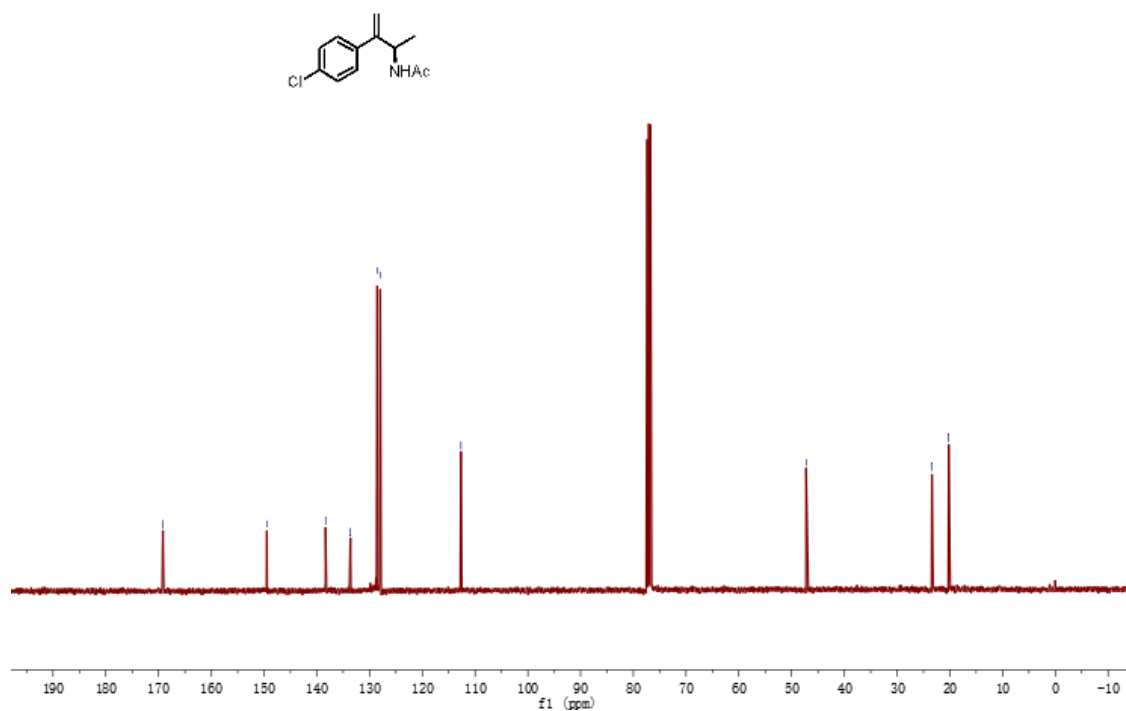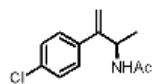

2g - <sup>1</sup>H NMR and <sup>13</sup>C NMR

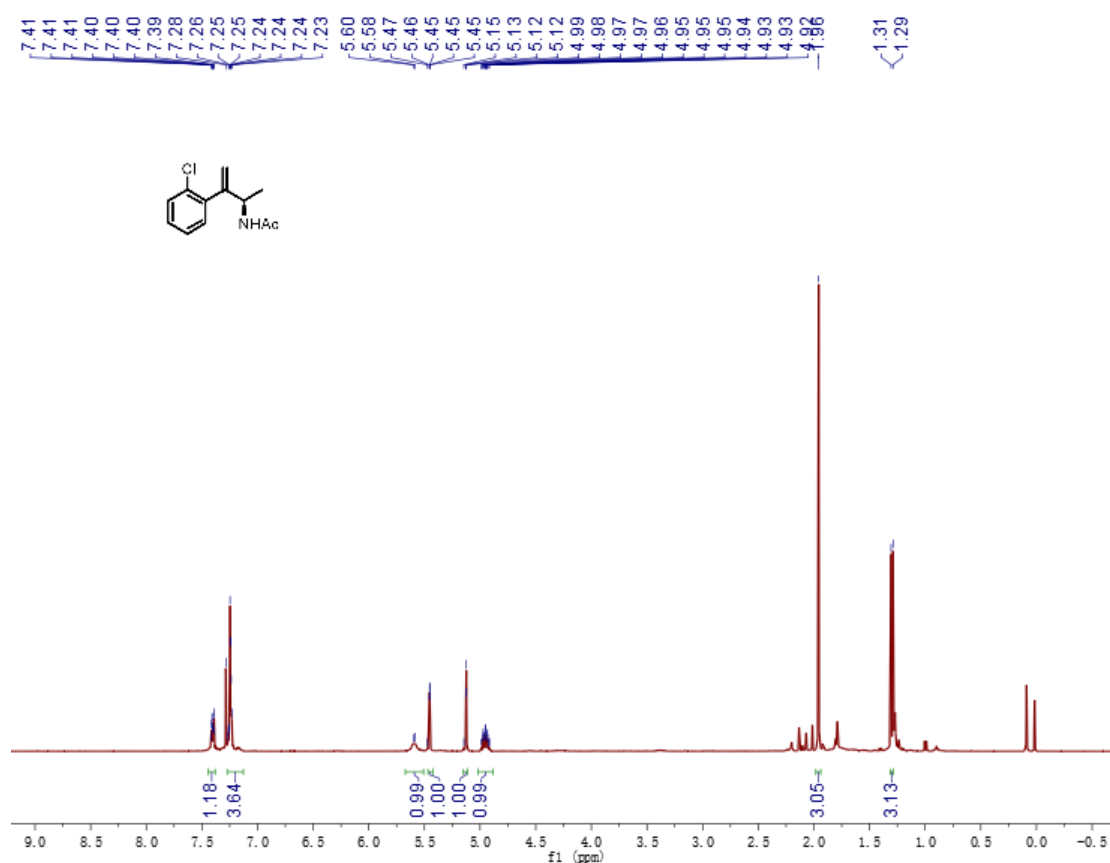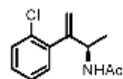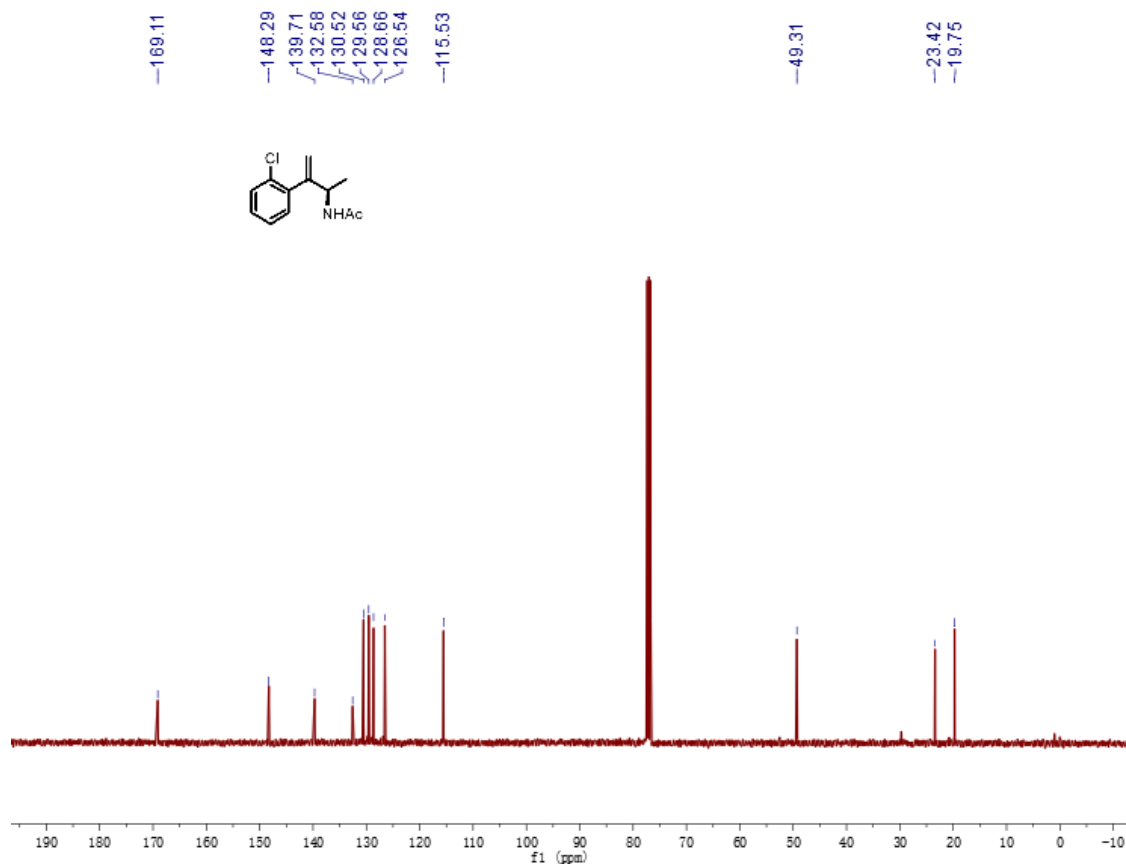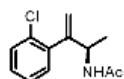

2h -  $^1\text{H}$  NMR and  $^{13}\text{C}$  NMR

7.46  
7.46  
7.45  
7.44  
7.44  
7.30  
7.29  
7.28  
7.27  
7.27  
5.48  
5.33  
5.24  
5.10  
5.08  
5.06  
5.04  
5.03

-1.95  
1.32  
1.30

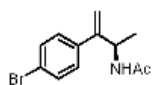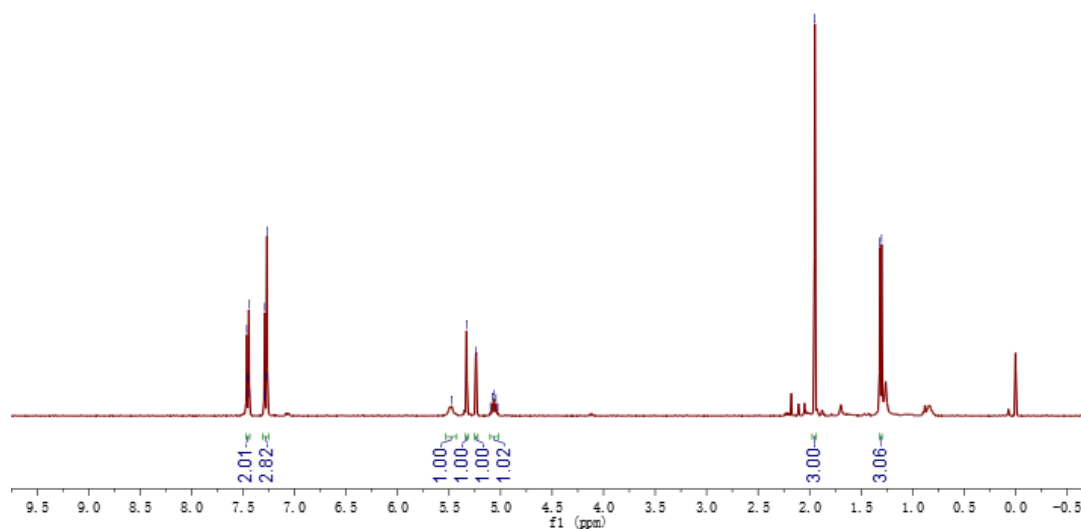

-169.15  
-149.51  
138.80  
131.51  
128.32  
121.84  
-112.75  
77.37  
77.26  
77.05  
76.74  
-47.20  
-23.42  
-20.22

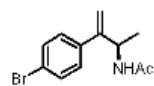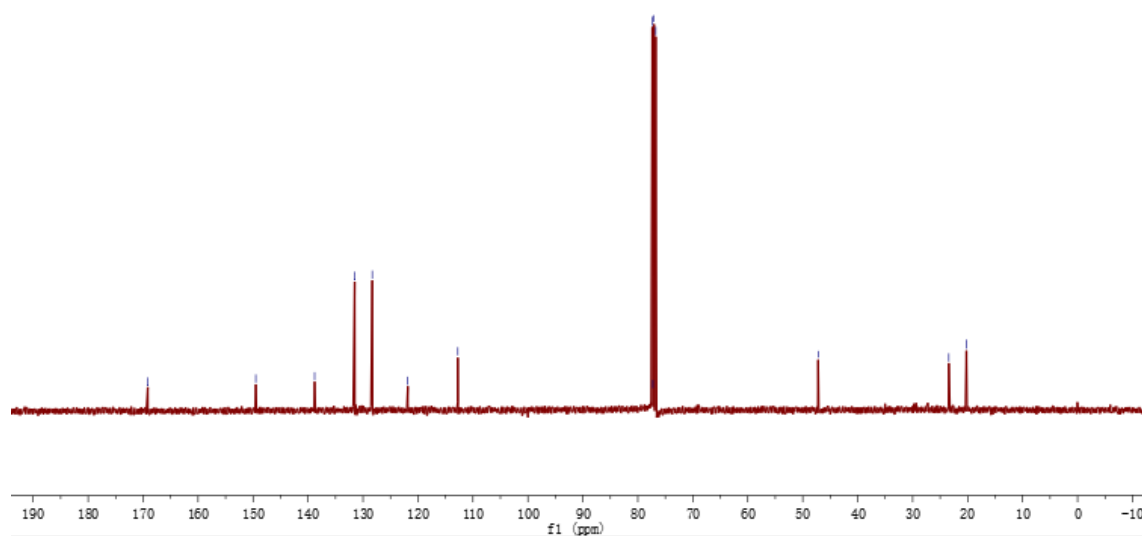

2i - <sup>1</sup>H NMR and <sup>13</sup>C NMR

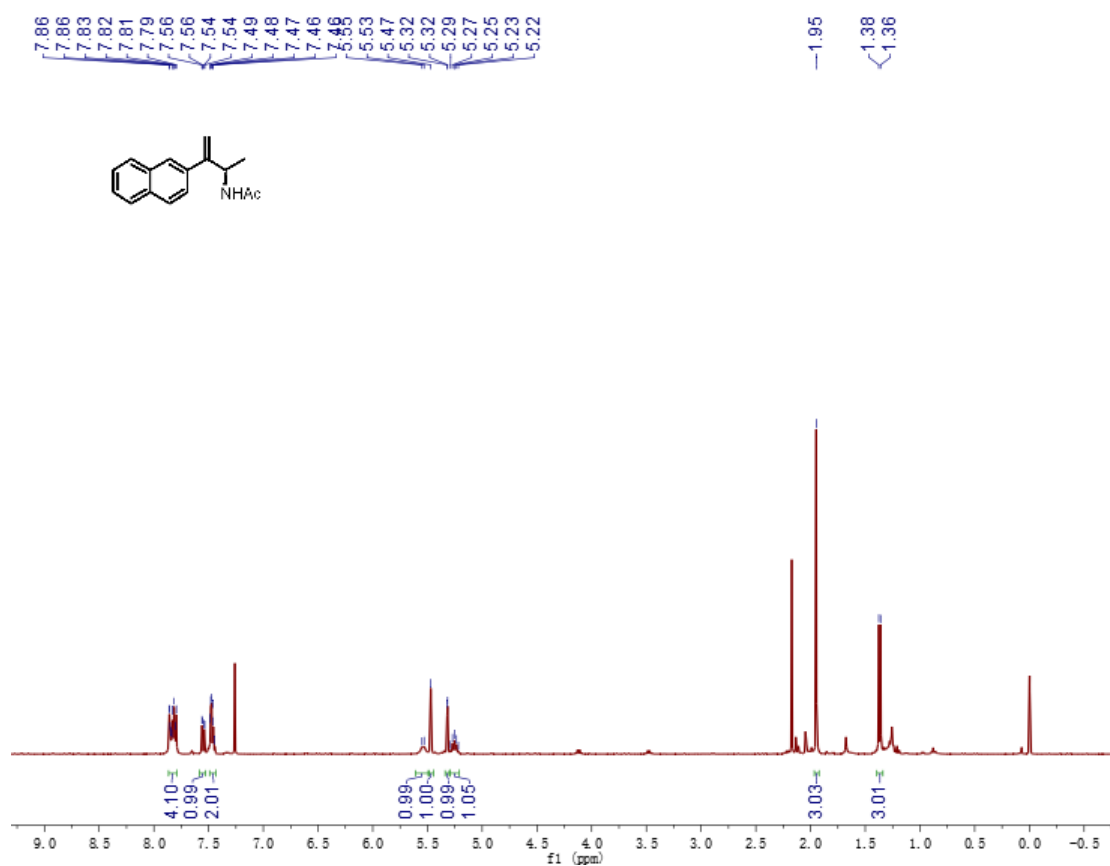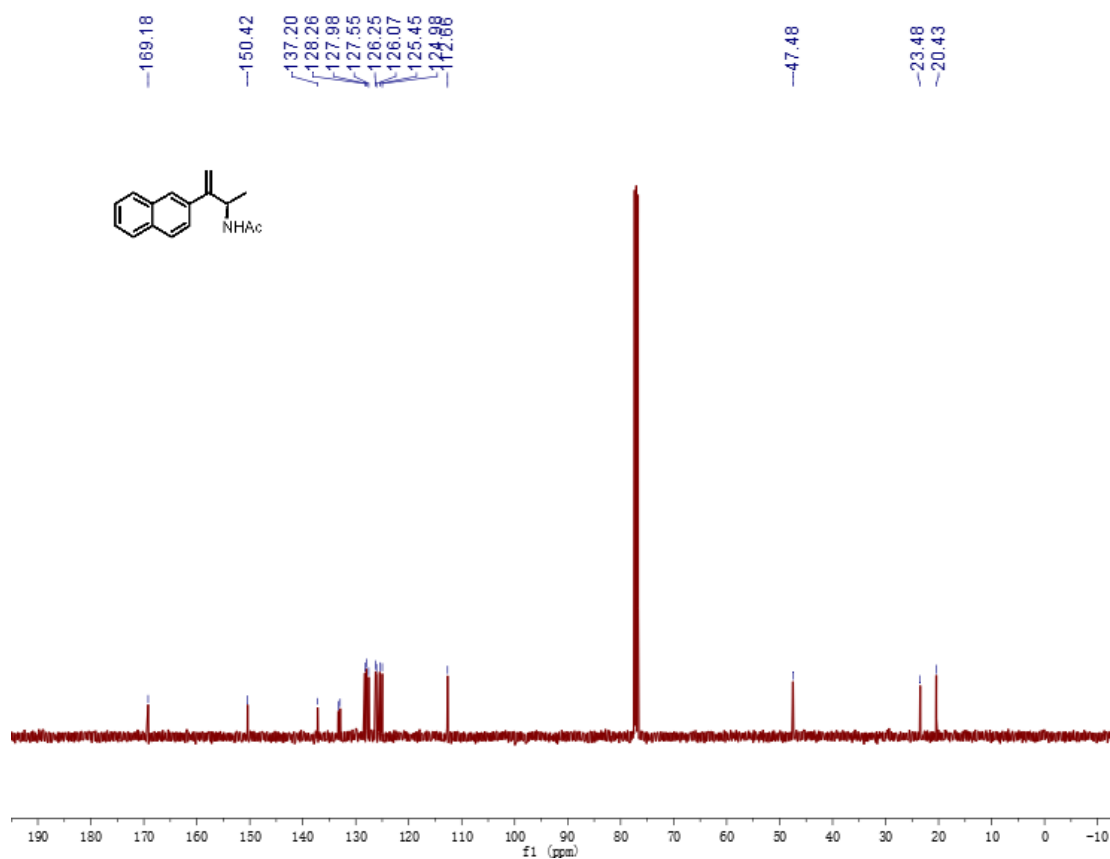

2j -  $^1\text{H}$  NMR and  $^{13}\text{C}$  NMR

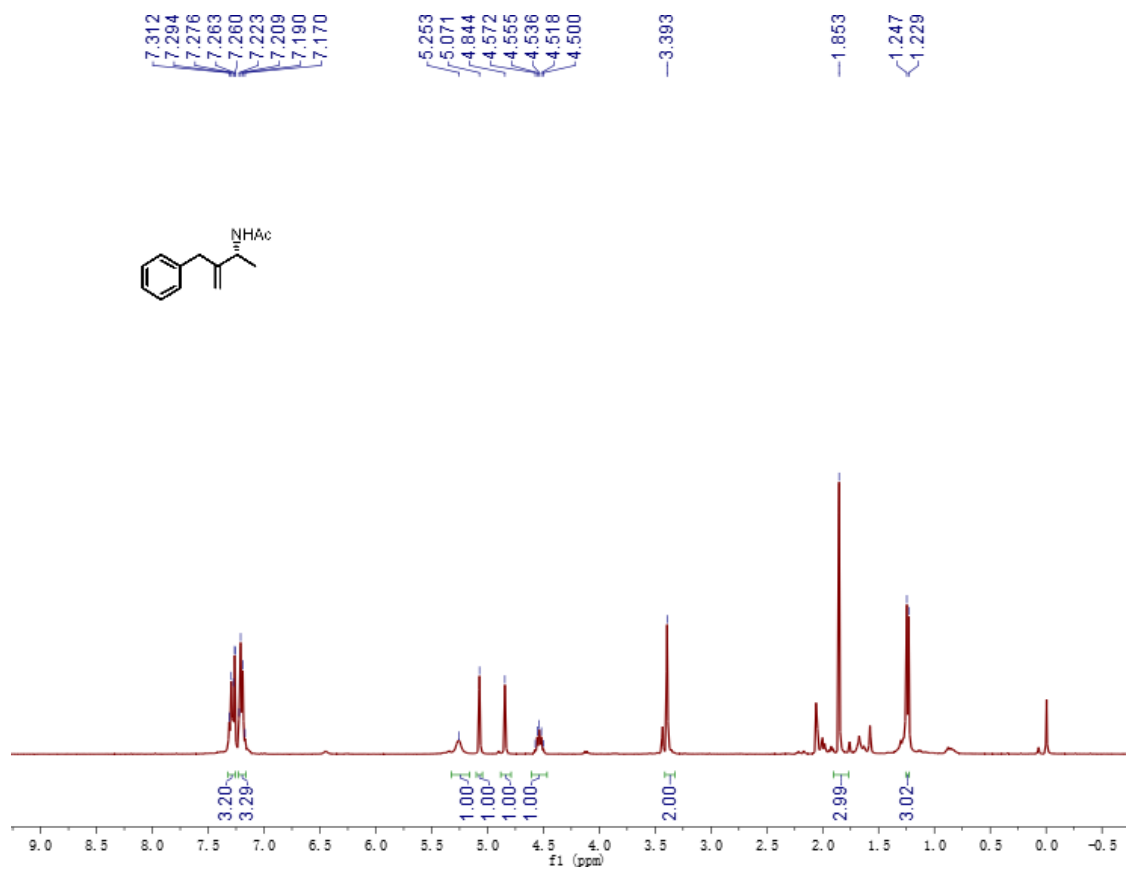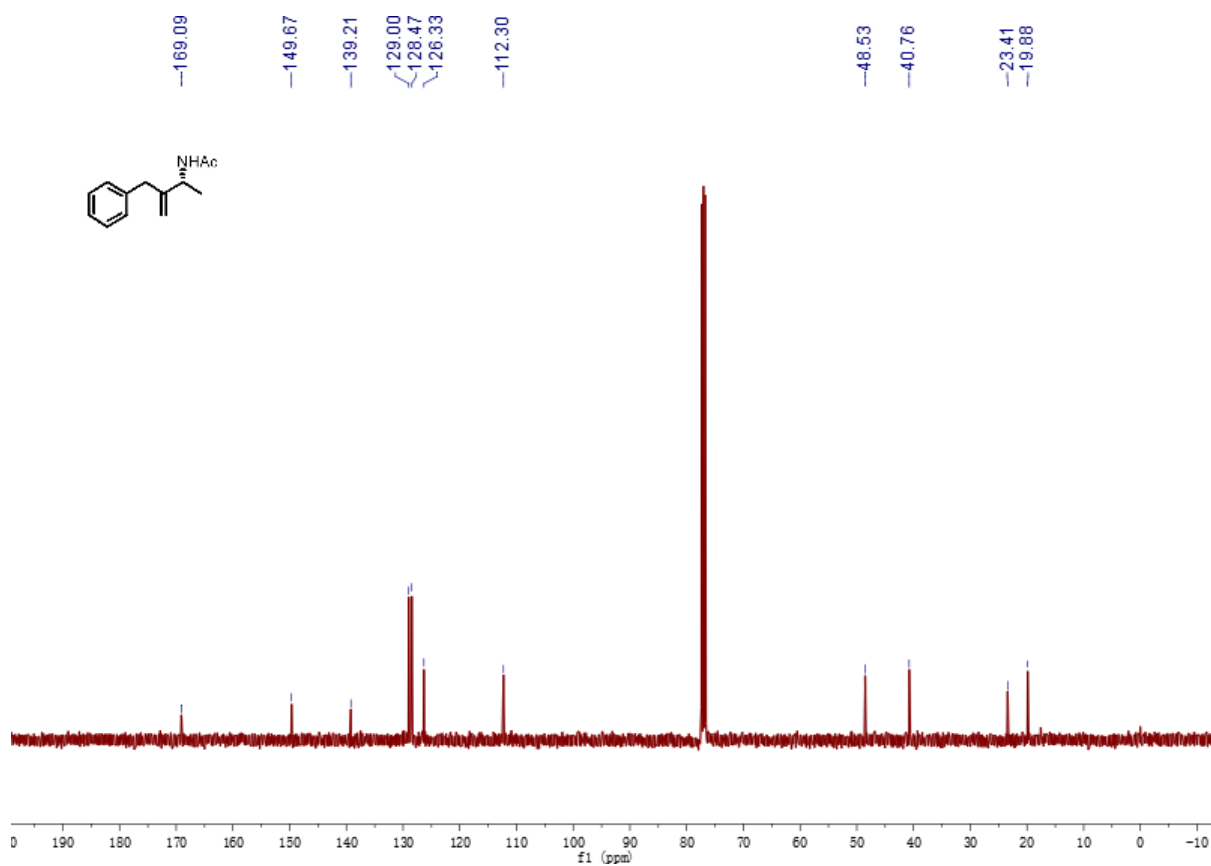

2k -  $^1\text{H}$  NMR and  $^{13}\text{C}$  NMR

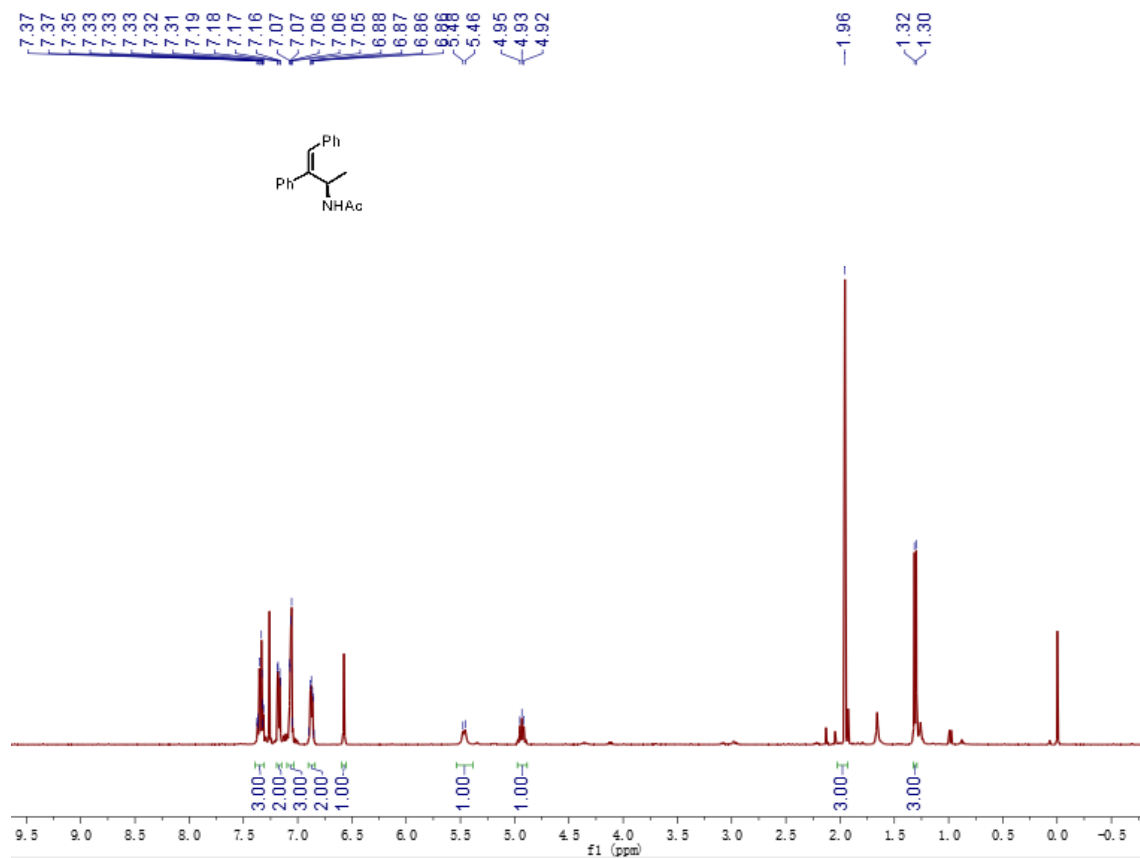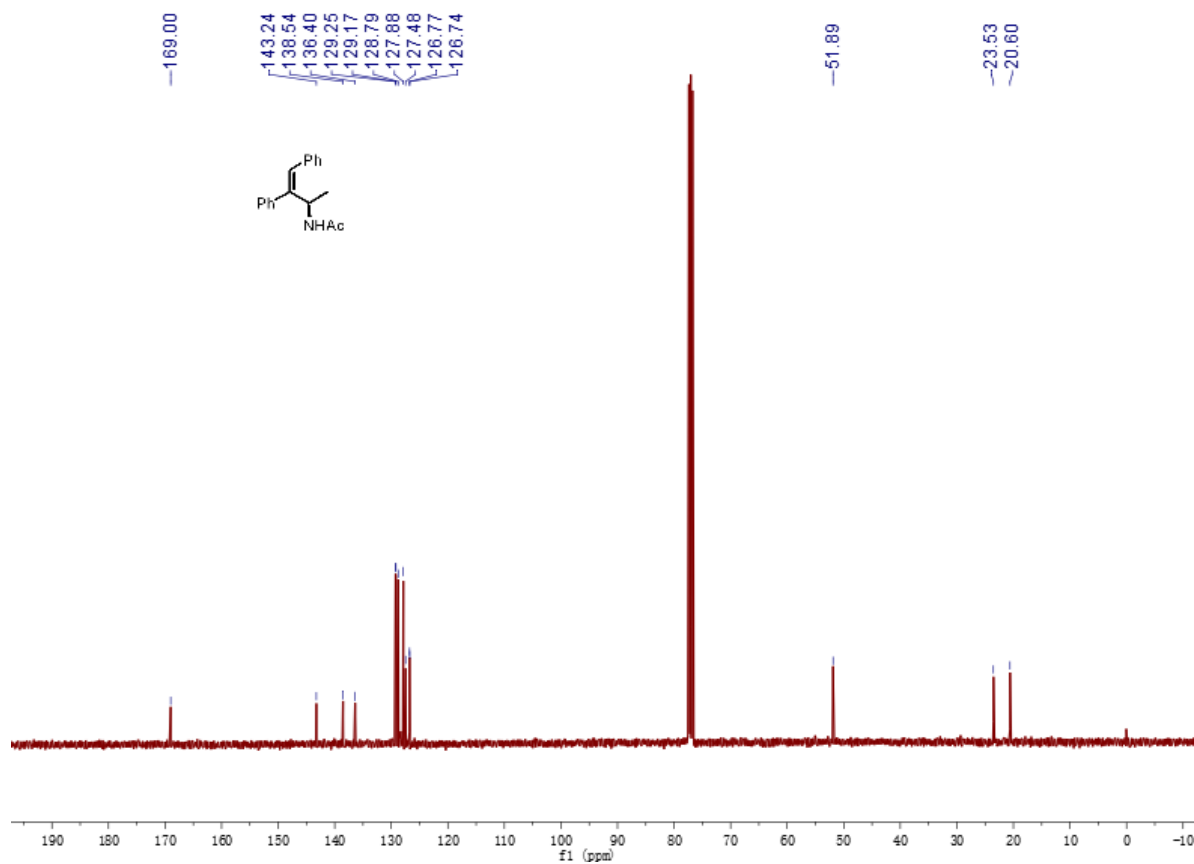

21 -  $^1\text{H}$  NMR and  $^{13}\text{C}$  NMR

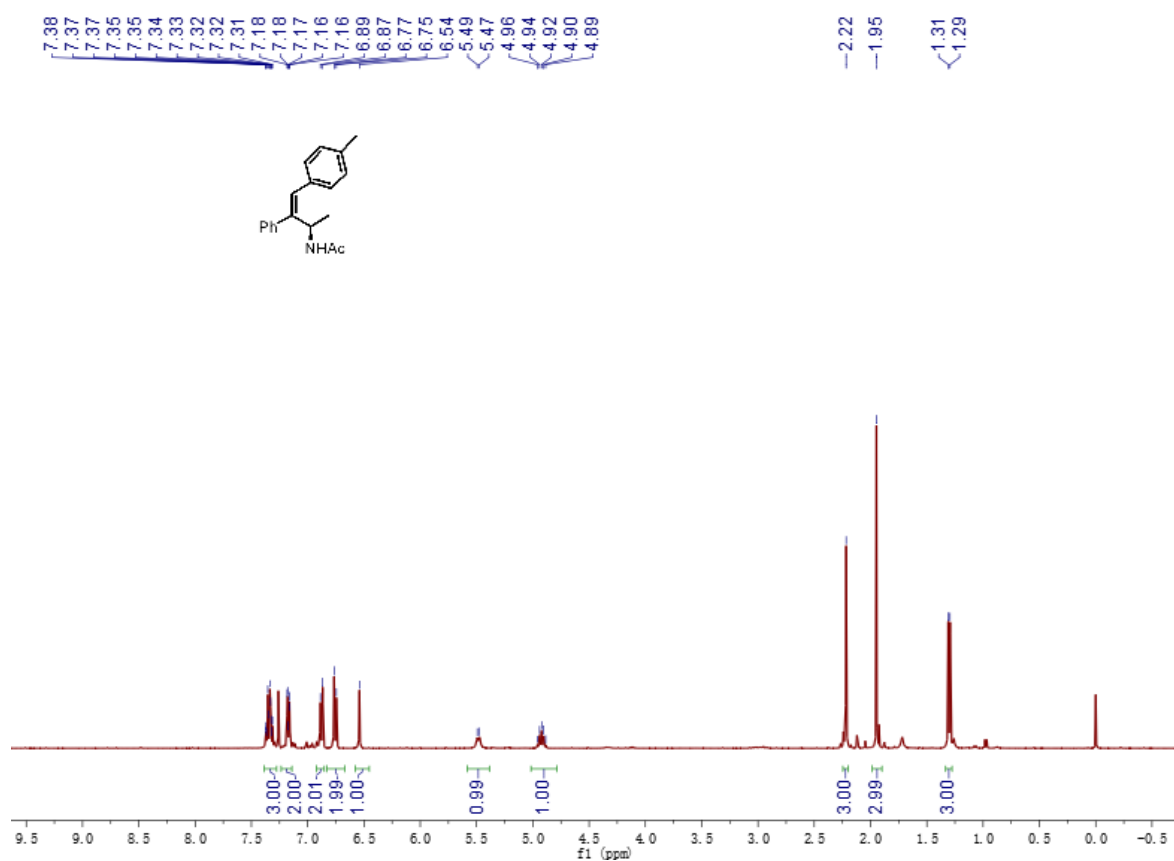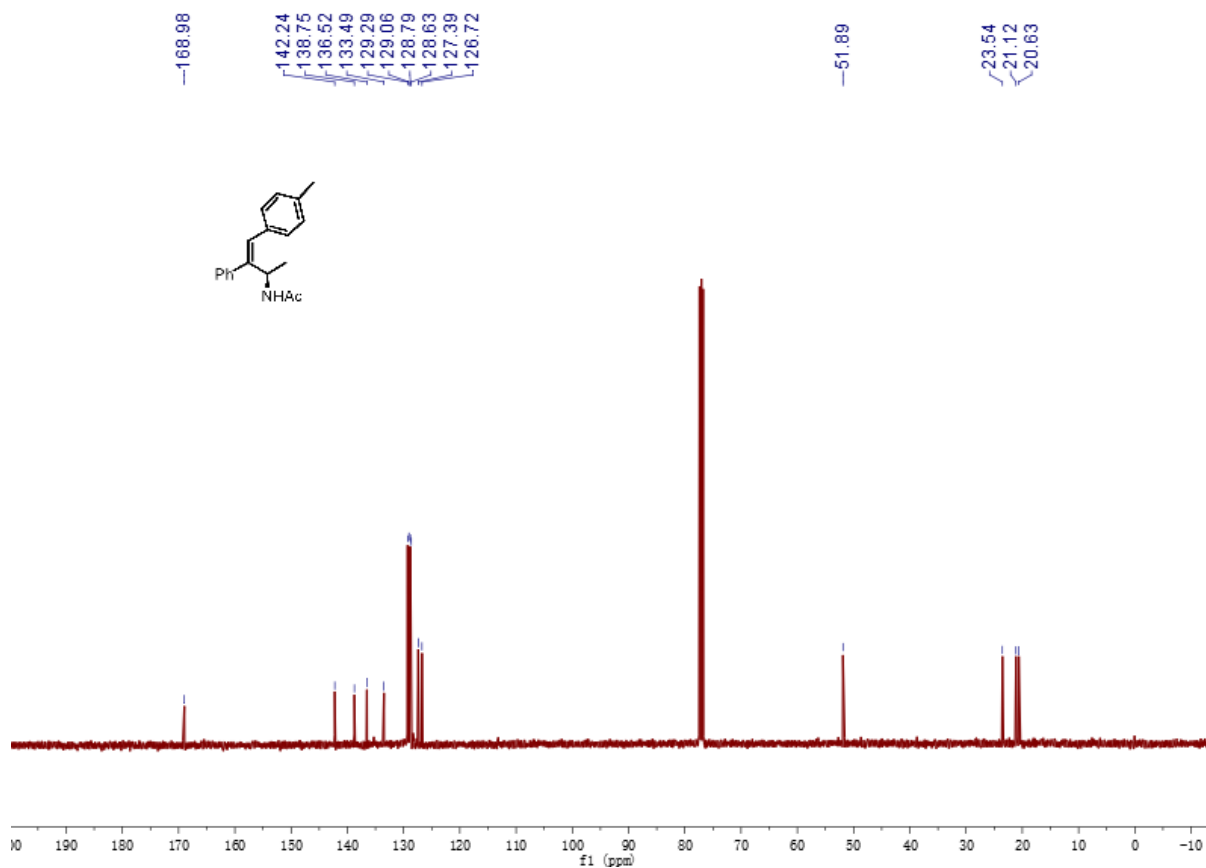



2m -  $^1\text{H}$  NMR and  $^{13}\text{C}$  NMR

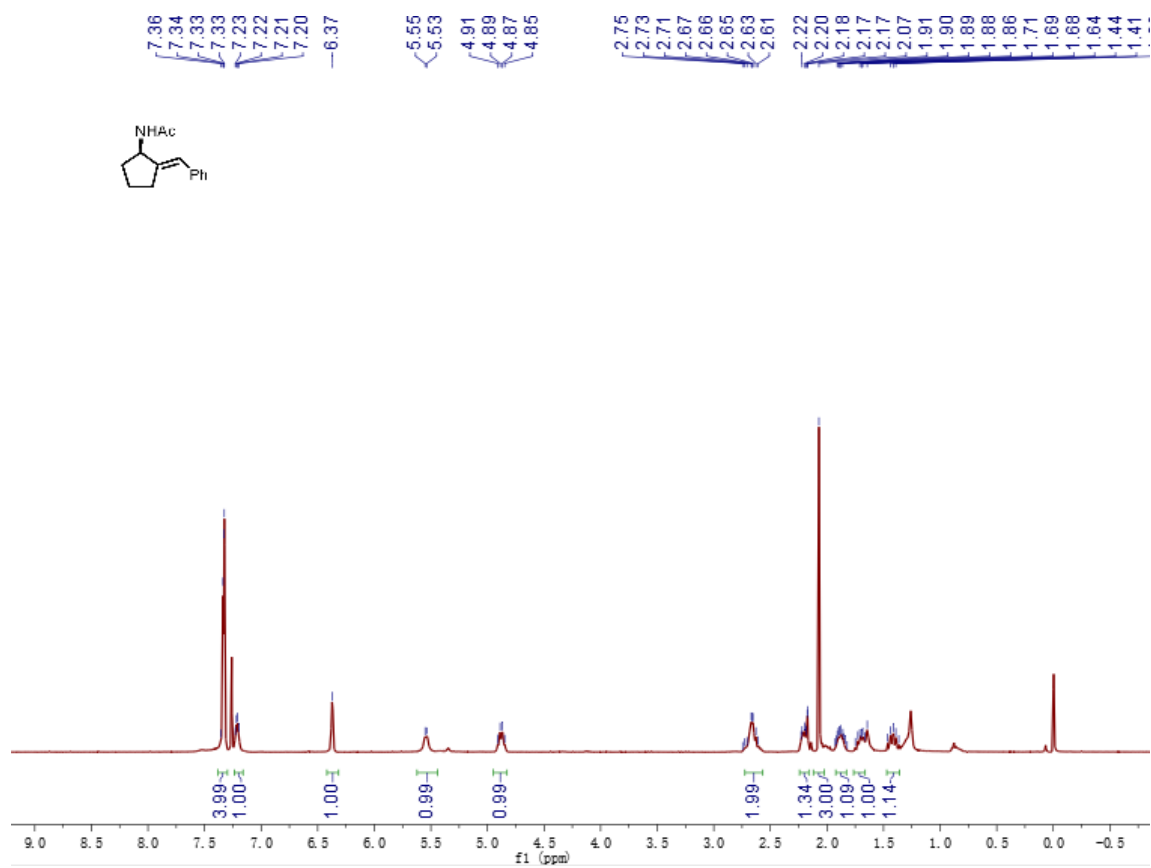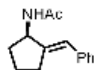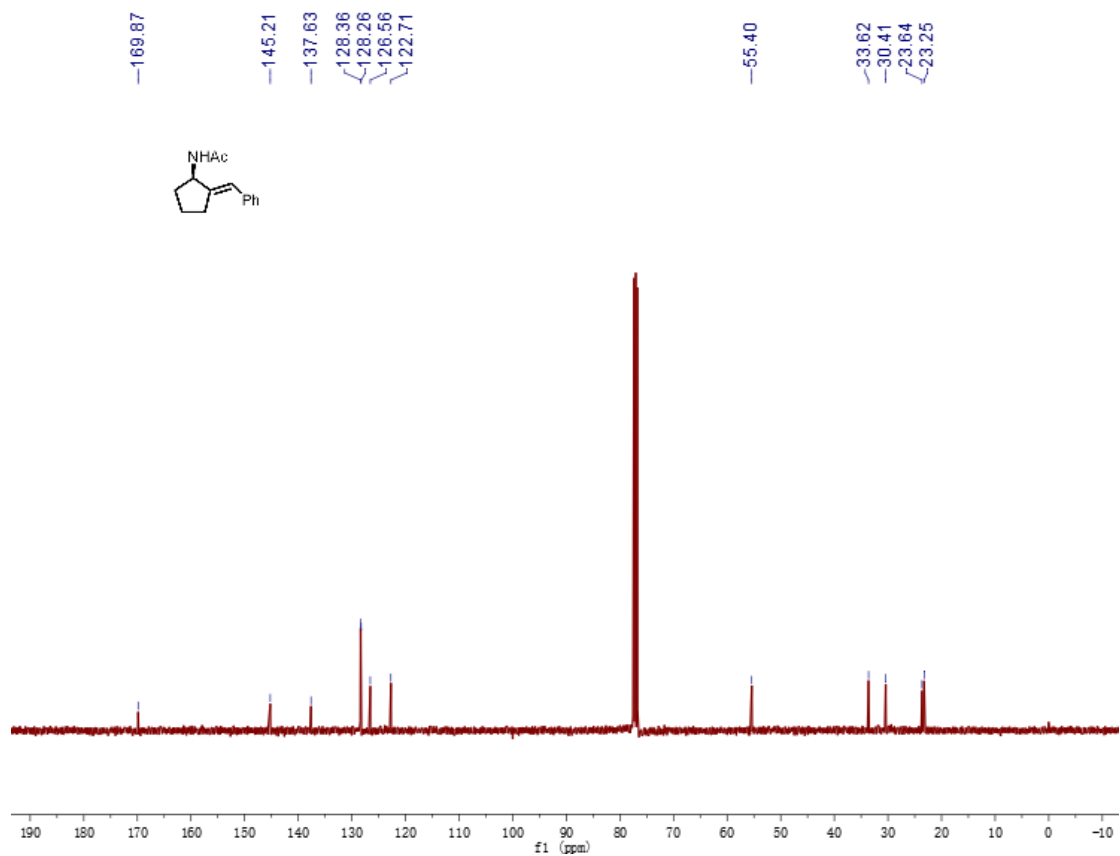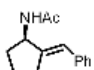

3d -  $^1\text{H}$  NMR and  $^{13}\text{C}$  NMR

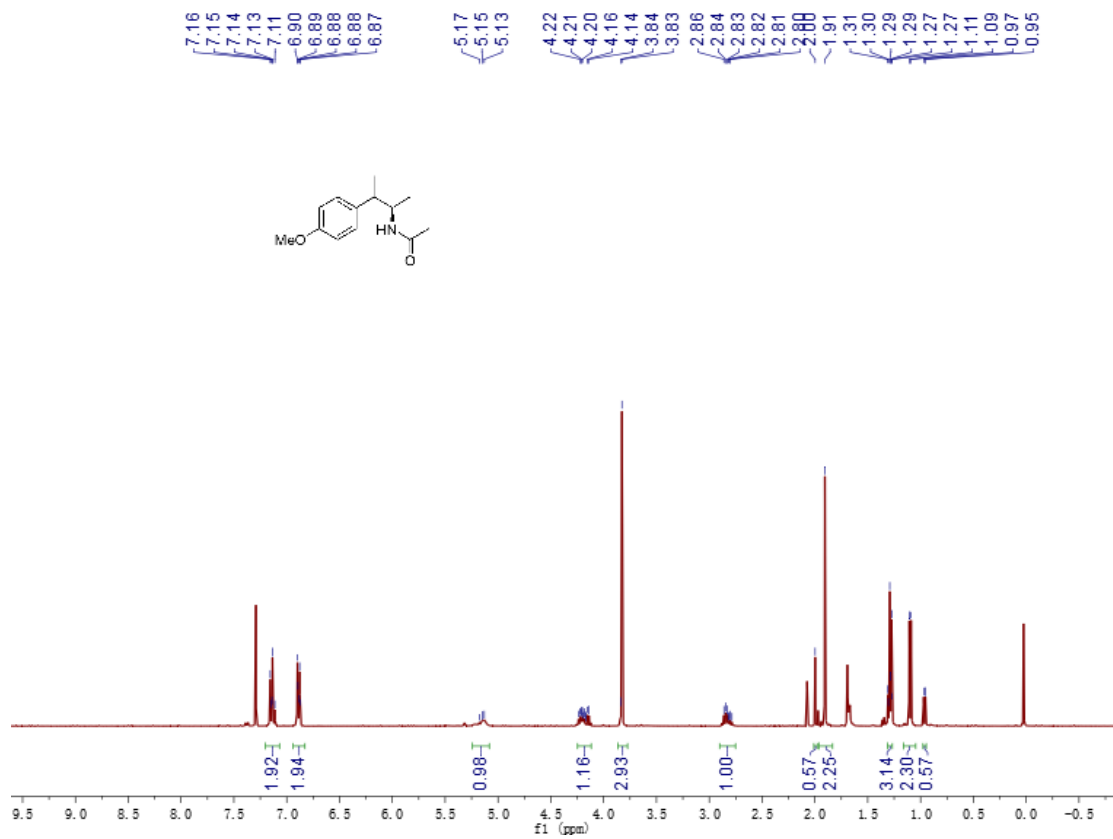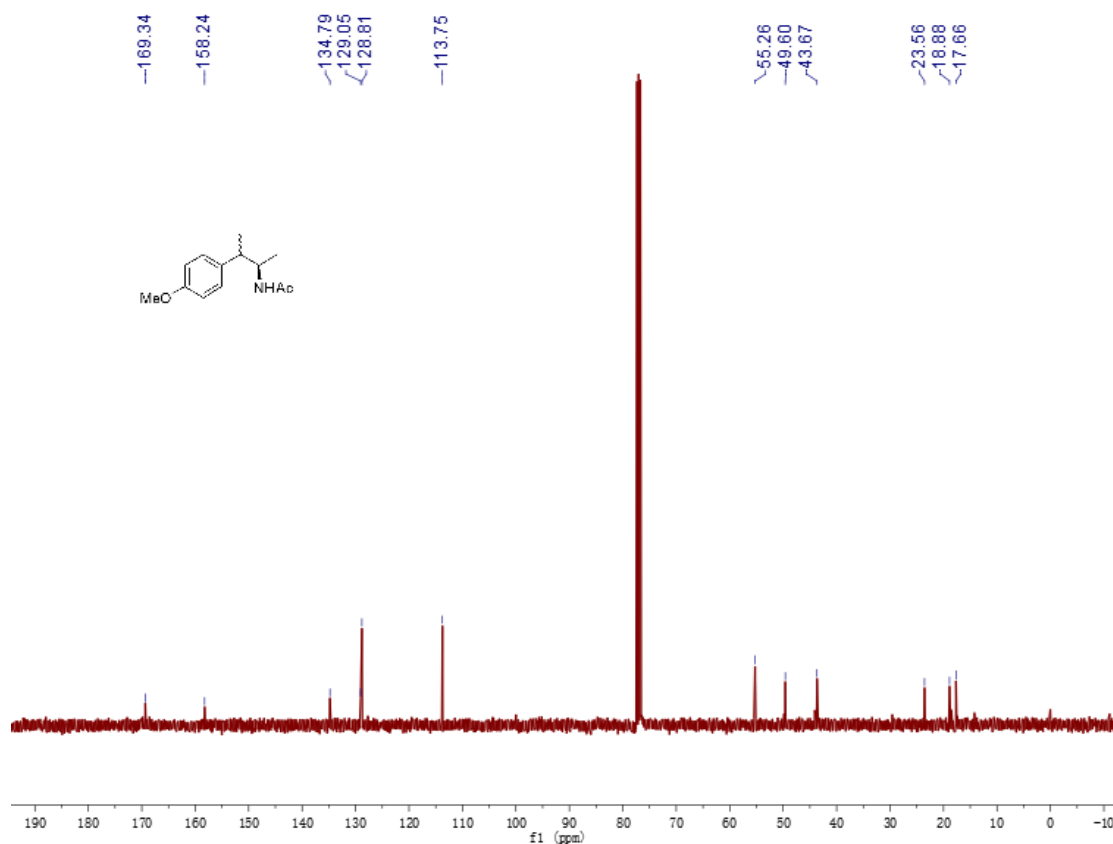

2a - HPLC

Data File E:\DATA\WQL\WQL-2-69-C\DAD-ODH-97-3-WQL-2-68-C 2013-05-14 16-26-27\043-0201.D  
 Sample Name: WQL-2-54-1

```

=====
Acq. Operator   : SYSTEM                               Seq. Line :    2
Acq. Instrument : 1260HPLC-DAD                         Location  : Vial 43
Injection Date  : 5/14/2013 4:38:25 PM                 Inj       :    1
                                                    Inj Volume: 5.000 µl
Acq. Method     : E:\DATA\WQL\WQL-2-69-C\DAD-ODH-97-3-WQL-2-68-C 2013-05-14 16-26-27\DAD-
                  ODH-95-5-1ML-40MIN(1-6).M
Last changed    : 5/14/2013 4:26:27 PM by SYSTEM
Analysis Method : E:\DATA\WQL\WQL-2-69-C\DAD-ODH-97-3-WQL-2-68-C 2013-05-14 16-26-27\DAD-
                  ODH-95-5-1ML-40MIN(1-6).M (Sequence Method)
Last changed    : 4/29/2015 3:09:38 PM by SYSTEM
                  (modified after loading)
Additional Info : Peak(s) manually integrated
  
```

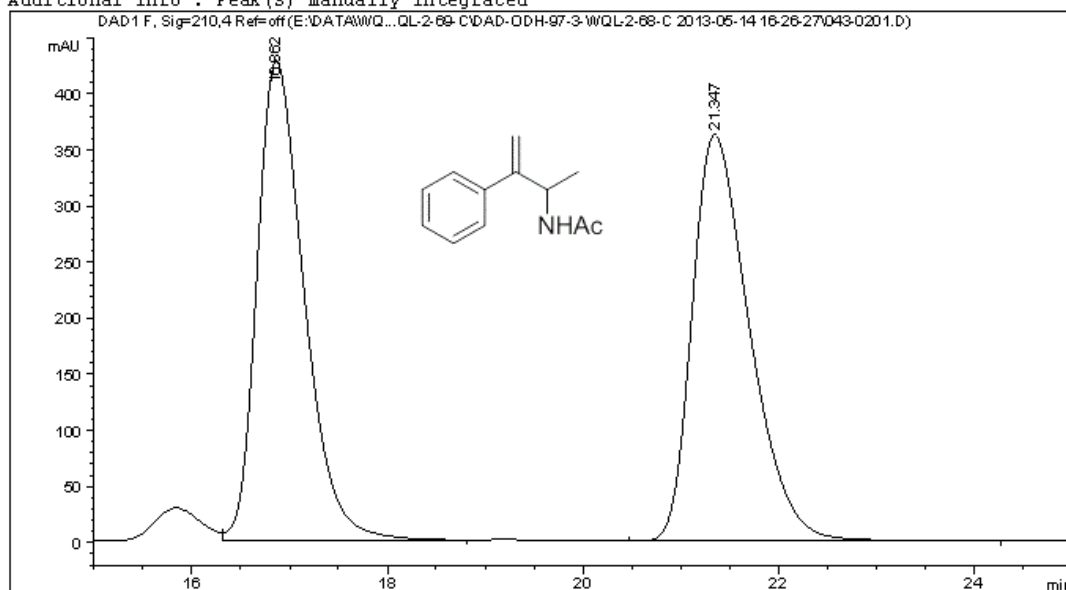

Area Percent Report

```

Sorted By      : Signal
Multiplier     : 1.0000
Dilution      : 1.0000
Do not use Multiplier & Dilution Factor with ISTDs
  
```

Signal 1: DAD1 F, Sig=210,4 Ref=off

| Peak # | RetTime [min] | Type | Width [min] | Area [mAU*s] | Height [mAU] | Area %  |
|--------|---------------|------|-------------|--------------|--------------|---------|
| 1      | 16.862        | VB   | 0.5145      | 1.43278e4    | 428.00723    | 49.1943 |
| 2      | 21.347        | BB   | 0.6222      | 1.47972e4    | 362.55991    | 50.8057 |

Totals : 2.91250e4 790.56714

\*\*\* End of Report \*\*\*

```

=====
Acq. Operator   : SYSTEM                      Seq. Line :    5
Acq. Instrument : 1260HPLC-DAD                Location  : Vial 47
Injection Date  : 5/14/2013 6:41:17 PM       Inj       :    1
                                           Inj Volume: 5.000 µl
Acq. Method     : E:\DATA\WQL\WQL-2-69-C\DAD-ODH-97-3-WQL-2-68-C 2013-05-14 16-26-27\DAD-
                  ODH-95-5-1ML-40MIN(1-6).M
Last changed    : 5/14/2013 4:26:27 PM by SYSTEM
Analysis Method : E:\DATA\WQL\WQL-2-69-C\DAD-ODH-97-3-WQL-2-68-C 2013-05-14 16-26-27\DAD-
                  ODH-95-5-1ML-40MIN(1-6).M (Sequence Method)
Last changed    : 4/29/2015 2:46:35 PM by SYSTEM
                  (modified after loading)
  
```

Additional Info : Peak(s) manually integrated

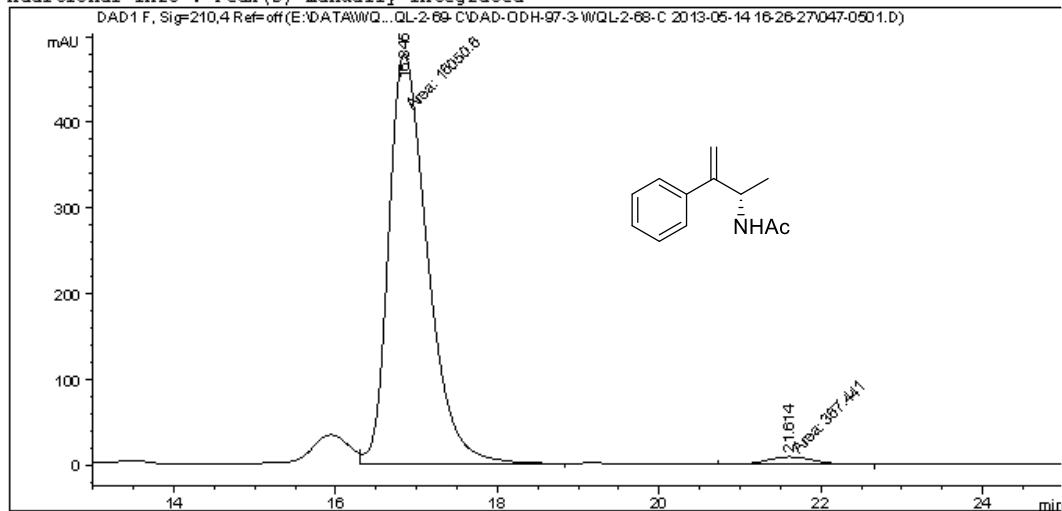

=====  
 Area Percent Report  
 =====

```

Sorted By       :      Signal
Multiplier      :      1.0000
Dilution        :      1.0000
Do not use Multiplier & Dilution Factor with ISTDs
  
```

Signal 1: DAD1 F, Sig=210,4 Ref=off

| Peak # | RetTime [min] | Type | Width [min] | Area [mAU*s] | Height [mAU] | Area %  |
|--------|---------------|------|-------------|--------------|--------------|---------|
| 1      | 16.845        | FM   | 0.5580      | 1.60506e4    | 479.42480    | 97.7620 |
| 2      | 21.614        | MM   | 0.6807      | 367.44070    | 8.99603      | 2.2380  |

Totals :                    1.64180e4    488.42083

=====  
 \*\*\* End of Report \*\*\*

2b - HPLC

Data File E:\DATA\WQL\WQL-2-78-A\VWD-0JH--95-5-WQL-2-78-A 2013-06-14 21-02-41\023-0401.D  
 Sample Name: WQL-2-74-3

```

=====
Acq. Operator   : SYSTEM                      Seq. Line :    4
Acq. Instrument : 1260HPLC-VWD                Location  : Vial 23
Injection Date  : 6/14/2013 10:35:40 PM      Inj       :    1
                                           Inj Volume: 5.000 µl
Acq. Method    : E:\DATA\WQL\WQL-2-78-A\VWD-0JH--95-5-WQL-2-78-A 2013-06-14 21-02-41\VWD-
0JH-95-5-1ML-254NM-40MIN(1-2).M
Last changed   : 6/14/2013 9:02:42 PM by SYSTEM
Analysis Method: E:\DATA\WQL\WQL-2-78-A\VWD-0JH--95-5-WQL-2-78-A 2013-06-14 21-02-41\VWD-
0JH-95-5-1ML-254NM-40MIN(1-2).M (Sequence Method)
Last changed   : 4/29/2015 3:43:42 PM by SYSTEM
                (modified after loading)
Additional Info : Peak(s) manually integrated
  
```

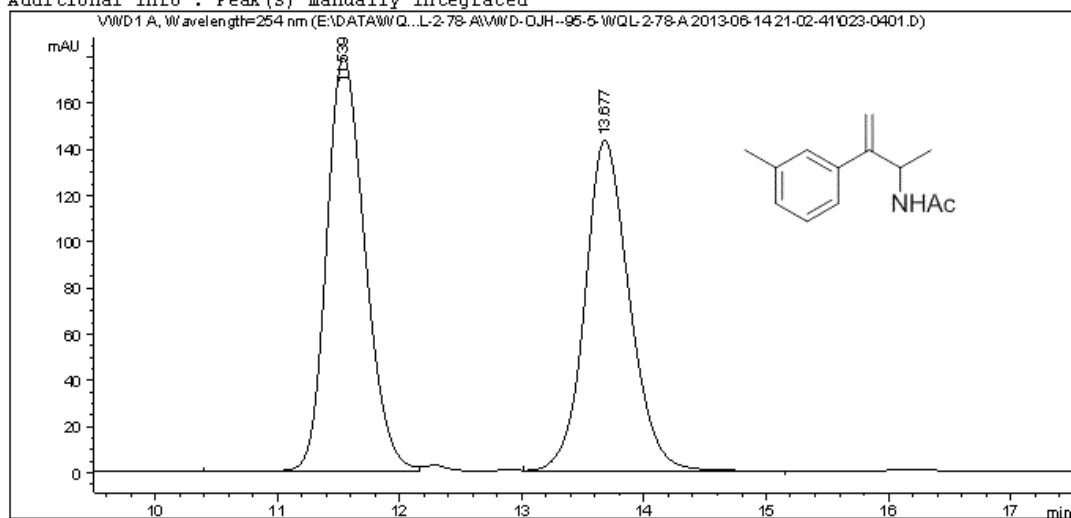

Area Percent Report

```

Sorted By      :      Signal
Multiplier     :      1.0000
Dilution       :      1.0000
Do not use Multiplier & Dilution Factor with ISTDs
  
```

Signal 1: VWD1 A, Wavelength=254 nm

| Peak # | RetTime [min] | Type | Width [min] | Area [mAU*s] | Height [mAU] | Area %  |
|--------|---------------|------|-------------|--------------|--------------|---------|
| 1      | 11.539        | BV   | 0.3371      | 3901.96606   | 179.13626    | 51.8904 |
| 2      | 13.677        | VB   | 0.3849      | 3617.66992   | 143.12558    | 48.1096 |

Totals : 7519.63599 322.26184

\*\*\* End of Report \*\*\*

```

=====
Acq. Operator   : SYSTEM                      Seq. Line :    5
Acq. Instrument : 1260HPLC-VWD                Location  : Vial 24
Injection Date  : 6/14/2013 11:16:25 PM      Inj       :    1
                                           Inj Volume: 5.000 µl
Acq. Method    : E:\DATA\WQL\WQL-2-78-A\VWD-OJH--95-5-WQL-2-78-A 2013-06-14 21-02-41\VWD-
                0JH-95-5-1ML-254NM-40MIN(1-2).M
Last changed   : 6/14/2013 9:02:42 PM by SYSTEM
Analysis Method : E:\DATA\WQL\WQL-2-78-A\VWD-OJH--95-5-WQL-2-78-A 2013-06-14 21-02-41\VWD-
                0JH-95-5-1ML-254NM-40MIN(1-2).M (Sequence Method)
Last changed   : 4/29/2015 3:43:42 PM by SYSTEM
                (modified after loading)
Additional Info : Peak(s) manually integrated
  
```

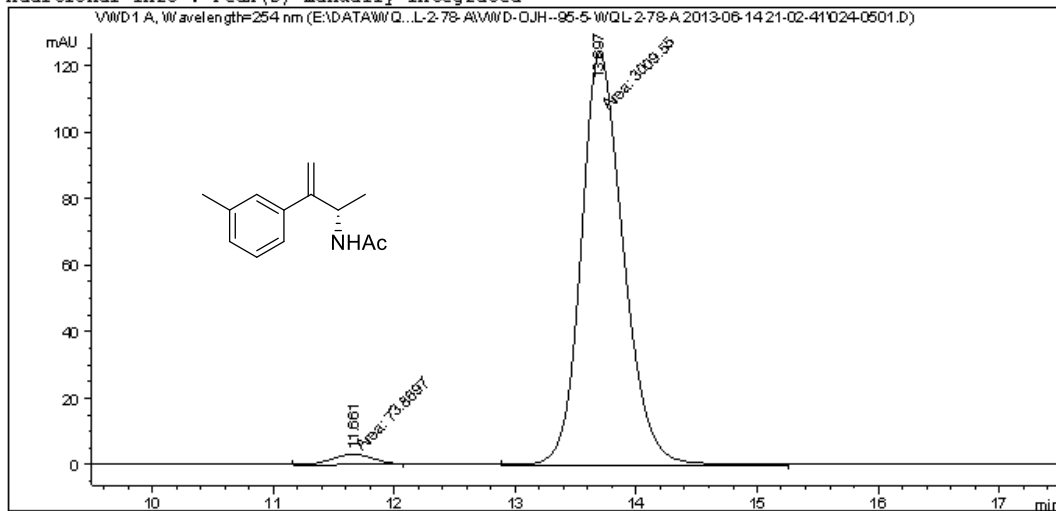

=====  
 Area Percent Report  
 =====

```

Sorted By      :      Signal
Multiplier     :      1.0000
Dilution      :      1.0000
Do not use Multiplier & Dilution Factor with ISTDs
  
```

Signal 1: VWD1 A, Wavelength=254 nm

| Peak # | RetTime [min] | Type | Width [min] | Area [mAU*s] | Height [mAU] | Area %  |
|--------|---------------|------|-------------|--------------|--------------|---------|
| 1      | 11.661        | MM   | 0.4038      | 73.86974     | 3.04892      | 2.3957  |
| 2      | 13.697        | MM   | 0.4052      | 3009.54663   | 123.80196    | 97.6043 |

Totals :                            3083.41637   126.85088

=====  
 \*\*\* End of Report \*\*\*

Data File E:\DATA\WQL\WQL-2-78-A\VWD-0JH--95-5-WQL-2-78-A 2013-06-14 21-02-41\025-0601.D  
 Sample Name: WQL-2-78-4

```

=====
Acq. Operator   : SYSTEM                      Seq. Line :    6
Acq. Instrument : 1260HPLC-VWD                Location  : Vial 25
Injection Date  : 6/14/2013 11:57:13 PM      Inj       :    1
                                           Inj Volume: 5.000 µl
Acq. Method     : E:\DATA\WQL\WQL-2-78-A\VWD-0JH--95-5-WQL-2-78-A 2013-06-14 21-02-41\VWD-
0JH-95-5-1ML-254NM-40MIN(1-2).M
Last changed    : 6/14/2013 9:02:42 PM by SYSTEM
Analysis Method : E:\DATA\WQL\WQL-2-78-A\VWD-0JH--95-5-WQL-2-78-A 2013-06-14 21-02-41\VWD-
0JH-95-5-1ML-254NM-40MIN(1-2).M (Sequence Method)
Last changed    : 4/29/2015 3:50:38 PM by SYSTEM
                (modified after loading)
Additional Info : Peak(s) manually integrated
  
```

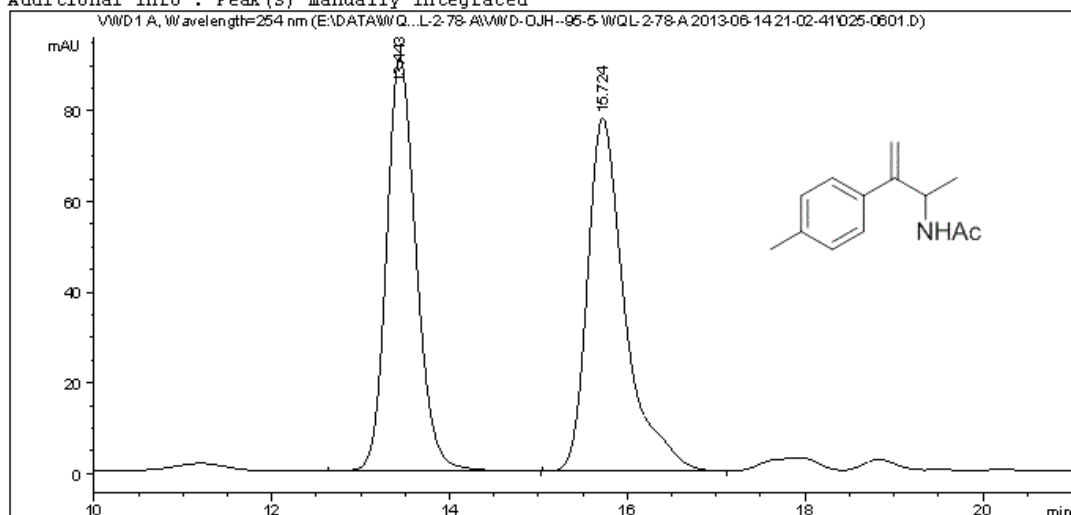

=====  
 Area Percent Report  
 =====

```

Sorted By      :      Signal
Multiplier     :      1.0000
Dilution       :      1.0000
Do not use Multiplier & Dilution Factor with ISTDs
  
```

Signal 1: VWD1 A, Wavelength=254 nm

| Peak # | RetTime [min] | Type | Width [min] | Area [mAU*s] | Height [mAU] | Area %  |
|--------|---------------|------|-------------|--------------|--------------|---------|
| 1      | 13.443        | BB   | 0.3566      | 2116.04980   | 91.23906     | 48.1864 |
| 2      | 15.724        | BB   | 0.4393      | 2275.33154   | 77.78905     | 51.8136 |

Totals :                    4391.38135   169.02811

=====  
 \*\*\* End of Report \*\*\*

Data File E:\DATA\WQL\WQL-2-78-A\VWD-OJH--95-5-WQL-2-78-A 2013-06-14 21-02-41\026-0701.D  
 Sample Name: WQL-2-78-7

```

=====
Acq. Operator   : SYSTEM                      Seq. Line :    7
Acq. Instrument : 1260HPLC-VWD                Location  : Vial 26
Injection Date  : 6/15/2013 12:37:57 AM      Inj       :    1
                                           Inj Volume: 5.000 µl
Acq. Method     : E:\DATA\WQL\WQL-2-78-A\VWD-OJH--95-5-WQL-2-78-A 2013-06-14 21-02-41\VWD-
                  0JH-95-5-1ML-254NM-40MIN(1-2).M
Last changed    : 6/14/2013 9:02:42 PM by SYSTEM
Analysis Method : E:\DATA\WQL\WQL-2-78-A\VWD-OJH--95-5-WQL-2-78-A 2013-06-14 21-02-41\VWD-
                  0JH-95-5-1ML-254NM-40MIN(1-2).M (Sequence Method)
Last changed    : 4/29/2015 3:50:38 PM by SYSTEM
                  (modified after loading)
Additional Info : Peak(s) manually integrated
  
```

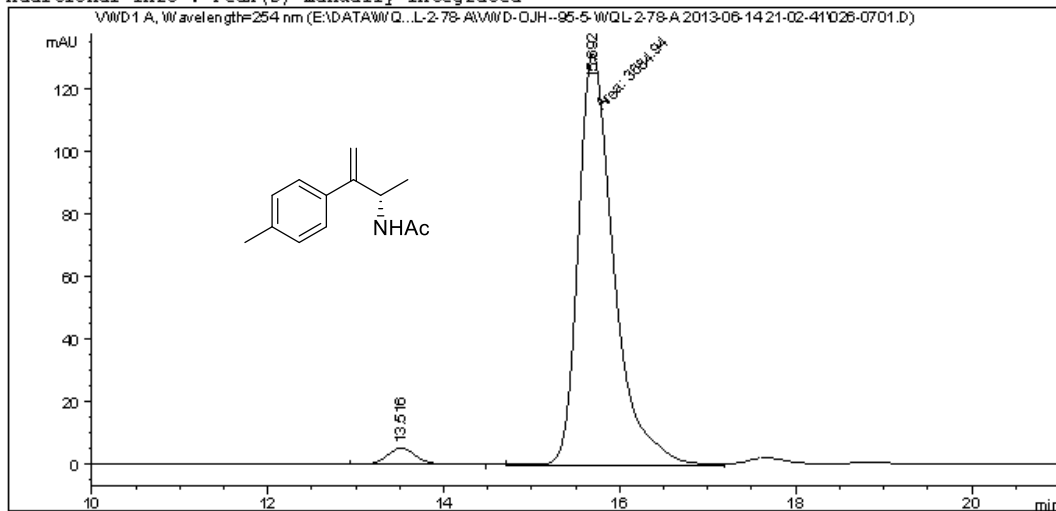

=====  
 Area Percent Report  
 =====

```

Sorted By       :      Signal
Multiplier      :      1.0000
Dilution        :      1.0000
Do not use Multiplier & Dilution Factor with ISTDs
  
```

Signal 1: VWD1 A, Wavelength=254 nm

| Peak # | RetTime [min] | Type | Width [min] | Area [mAU*s] | Height [mAU] | Area %  |
|--------|---------------|------|-------------|--------------|--------------|---------|
| 1      | 13.516        | BB   | 0.3529      | 119.95254    | 5.24414      | 3.1526  |
| 2      | 15.692        | MM   | 0.4668      | 3684.94287   | 131.57304    | 96.8474 |

Totals :                    3804.89541  136.81718

=====  
 \*\*\* End of Report \*\*\*



Data File E:\DATA\LXX\6-COOME\LXX-2-150S 2015-12-24 08-30-00\021-1701.D  
Sample Name: gwc-wai

```
=====
Acq. Operator   : SYSTEM                      Seq. Line :   17
Acq. Instrument : 1260HPLC-DAD              Location  : Vial 21
Injection Date  : 12/24/2015 5:53:22 PM      Inj       :    1
                                              Inj Volume: 1.000 µl
Acq. Method     : E:\DATA\LXX\6-COOME\LXX-2-150S 2015-12-24 08-30-00\DAD-OD(1-6)-95-5-1.
                : OML-ALL-40MIN.M
Last changed    : 12/24/2015 12:26:54 PM by SYSTEM
Analysis Method : E:\DATA\LXX\6-COOME\LXX-2-150S 2015-12-24 08-30-00\DAD-OD(1-6)-95-5-1.
                : OML-ALL-40MIN.M (Sequence Method)
Last changed    : 2/23/2016 9:31:52 PM by SYSTEM
                : (modified after loading)
Additional Info : Peak(s) manually integrated
=====
```

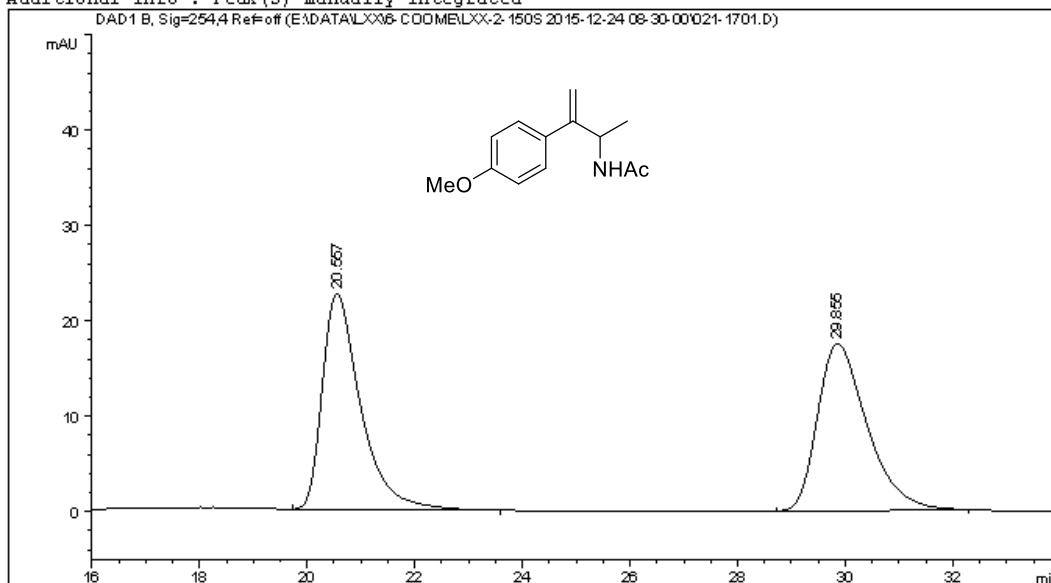

```
=====
                          Area Percent Report
=====
```

```
Sorted By       : Signal
Multiplier      : 1.0000
Dilution       : 1.0000
Do not use Multiplier & Dilution Factor with ISTDs
```

Signal 1: DAD1 B, Sig=254,4 Ref=off

| Peak # | RetTime [min] | Type | Width [min] | Area [mAU*s] | Height [mAU] | Area %  |
|--------|---------------|------|-------------|--------------|--------------|---------|
| 1      | 20.557        | BB   | 0.7262      | 1122.28625   | 22.64534     | 49.9401 |
| 2      | 29.855        | BB   | 0.9046      | 1124.98010   | 17.53318     | 50.0599 |

Totals :                                  2247.26636    40.17852

```
=====
*** End of Report ***
=====
```

```

=====
Acq. Operator   : SYSTEM                      Seq. Line :   34
Acq. Instrument : 1260HPLC-DAD                Location  : Vial 32
Injection Date  : 12/25/2015 3:31:46 AM      Inj       :    1
                                           Inj Volume: 5.000 µl
Acq. Method     : E:\DATA\LXX\6-COOME\LXX-2-150S 2015-12-24 08-30-00\DAD-ODH-95-5-1ML-220-
                  254NM-40MIN(1-2).M
Last changed    : 12/24/2015 7:53:30 PM by SYSTEM
Analysis Method : E:\DATA\LXX\6-COOME\LXX-2-150S 2015-12-24 08-30-00\DAD-ODH-95-5-1ML-220-
                  254NM-40MIN(1-2).M (Sequence Method)
Last changed    : 2/23/2016 9:34:57 PM by SYSTEM
                  (modified after loading)
  
```

Additional Info : Peak(s) manually integrated

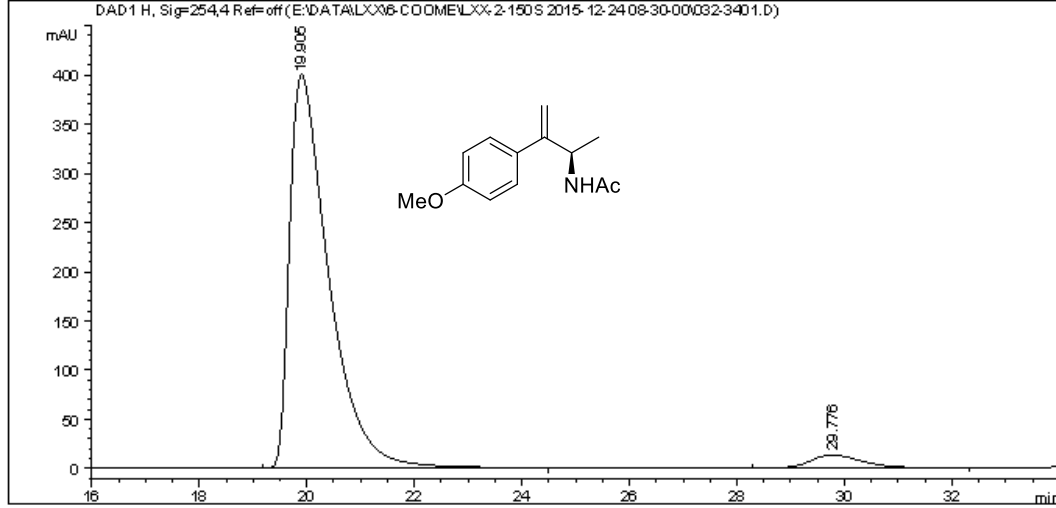

=====  
 Area Percent Report  
 =====

```

Sorted By       :      Signal
Multiplier      :      1.0000
Dilution       :      1.0000
Do not use Multiplier & Dilution Factor with ISTDs
  
```

Signal 1: DAD1 H, Sig=254,4 Ref=off

| Peak # | RetTime [min] | Type | Width [min] | Area [mAU*s] | Height [mAU] | Area %  |
|--------|---------------|------|-------------|--------------|--------------|---------|
| 1      | 19.905        | BB   | 0.7508      | 2.02663e4    | 400.18912    | 95.7518 |
| 2      | 29.776        | BB   | 0.8075      | 899.15448    | 13.38812     | 4.2482  |

Totals :                    2.11655e4    413.57723

=====  
 \*\*\* End of Report \*\*\*

2e - HPLC

Data File E:\DATA\GWC\GWC-16-1\DU1 F 0.5 2016-01-08 17-09-44\003-0201.D  
 Sample Name: 16-1-3

```

=====
Acq. Operator   : SYSTEM                      Seq. Line :    2
Acq. Instrument : 1260HPLC-DAD                Location  : Vial 3
Injection Date  : 1/8/2016 5:21:36 PM        Inj       :    1
                                           Inj Volume: 5.000 µl
Acq. Method     : E:\DATA\GWC\GWC-16-1\DU1 F 0.5 2016-01-08 17-09-44\DAD-OD(1-2)-95-5-0.
                                           SML-220NM-254NM-50MIN.M
Last changed    : 1/8/2016 5:48:01 PM by SYSTEM
                                           (modified after loading)
Analysis Method : E:\DATA\GWC\GWC-16-1\DU1 F 0.5 2016-01-08 17-09-44\DAD-OD(1-2)-95-5-0.
                                           SML-220NM-254NM-50MIN.M (Sequence Method)
Last changed    : 2/22/2016 10:33:13 AM by SYSTEM
                                           (modified after loading)
Additional Info : Peak(s) manually integrated
  
```

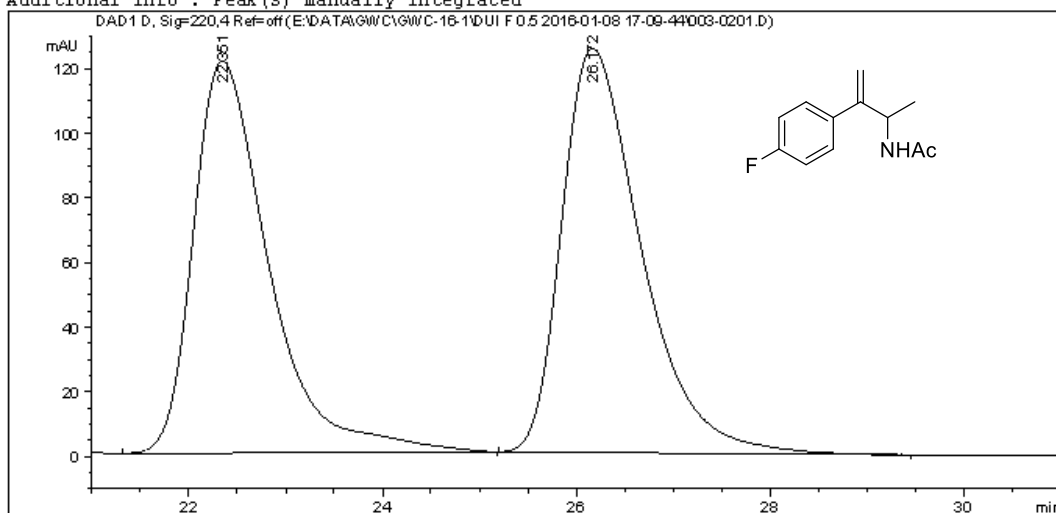

Area Percent Report

```

=====
Sorted By      :      Signal
Multiplier     :      1.0000
Dilution       :      1.0000
Do not use Multiplier & Dilution Factor with ISTDs
  
```

Signal 1: DAD1 D, Sig=220,4 Ref=off

| Peak # | RetTime [min] | Type | Width [min] | Area [mAU*s] | Height [mAU] | Area %  |
|--------|---------------|------|-------------|--------------|--------------|---------|
| 1      | 22.351        | BB   | 0.8191      | 6582.78223   | 121.29909    | 47.9349 |
| 2      | 26.172        | BB   | 0.8550      | 7149.95996   | 125.06830    | 52.0651 |

Totals : 1.37327e4 246.36739

\*\*\* End of Report \*\*\*

```

=====
Acq. Operator   : SYSTEM                               Seq. Line :    3
Acq. Instrument : 1260HPLC-DAD                         Location  : Vial 4
Injection Date  : 1/8/2016 5:57:30 PM                 Inj       :    1
                                                    Inj Volume: 5.000 µl
Acq. Method     : E:\DATA\GWC\GWC-16-1\DU1 F 0.5 2016-01-08 17-09-44\DAD-0D(1-2)-95-5-0.
                                                    SML-220NM-254NM-50MIN.M
Last changed    : 1/8/2016 5:48:01 PM by SYSTEM
Analysis Method : E:\DATA\GWC\GWC-16-1\DU1 F 0.5 2016-01-08 17-09-44\DAD-0D(1-2)-95-5-0.
                                                    SML-220NM-254NM-50MIN.M (Sequence Method)
Last changed    : 2/22/2016 10:36:02 AM by SYSTEM
                                                    (modified after loading)
    
```

Additional Info : Peak(s) manually integrated

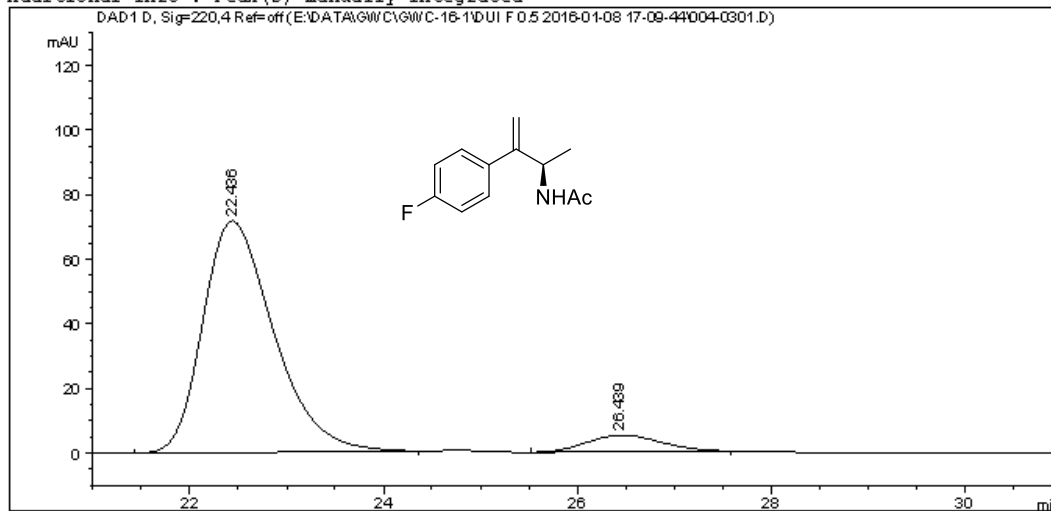

=====  
 Area Percent Report  
 =====

```

Sorted By       :      Signal
Multiplier      :      1.0000
Dilution       :      1.0000
Do not use Multiplier & Dilution Factor with ISTDs
    
```

Signal 1: DAD1 D, Sig=220,4 Ref=off

| Peak # | RetTime [min] | Type | Width [min] | Area [mAU*s] | Height [mAU] | Area %  |
|--------|---------------|------|-------------|--------------|--------------|---------|
| 1      | 22.436        | BB   | 0.7599      | 3649.48804   | 71.69084     | 93.0517 |
| 2      | 26.439        | BB   | 0.6259      | 272.51062    | 5.12842      | 6.9483  |

Totals :                      3921.99866    76.81926

=====  
 \*\*\* End of Report \*\*\*

2f - HPLC

Data File E:\DATA\GWC\GWC-16-1\DU1 CL 2015-12-31 18-32-05\041-0201.D  
 Sample Name: gwc-16-1-5

```

=====
Acq. Operator   : SYSTEM                      Seq. Line :    2
Acq. Instrument : 1260HPLC-DAD                 Location  : Vial 41
Injection Date  : 12/31/2015 6:43:57 PM      Inj       :    1
                                           Inj Volume: 5.000 µl
Acq. Method     : E:\DATA\GWC\GWC-16-1\DU1 CL 2015-12-31 18-32-05\DAD-OD(1-2)-95-5-0.5ML-
                220NM-254NM-50MIN.M
Last changed    : 12/31/2015 6:32:05 PM by SYSTEM
Analysis Method : E:\DATA\GWC\GWC-16-1\DU1 CL 2015-12-31 18-32-05\DAD-OD(1-2)-95-5-0.5ML-
                220NM-254NM-50MIN.M (Sequence Method)
Last changed    : 2/22/2016 10:48:00 AM by SYSTEM
                (modified after loading)
Additional Info : Peak(s) manually integrated
  
```

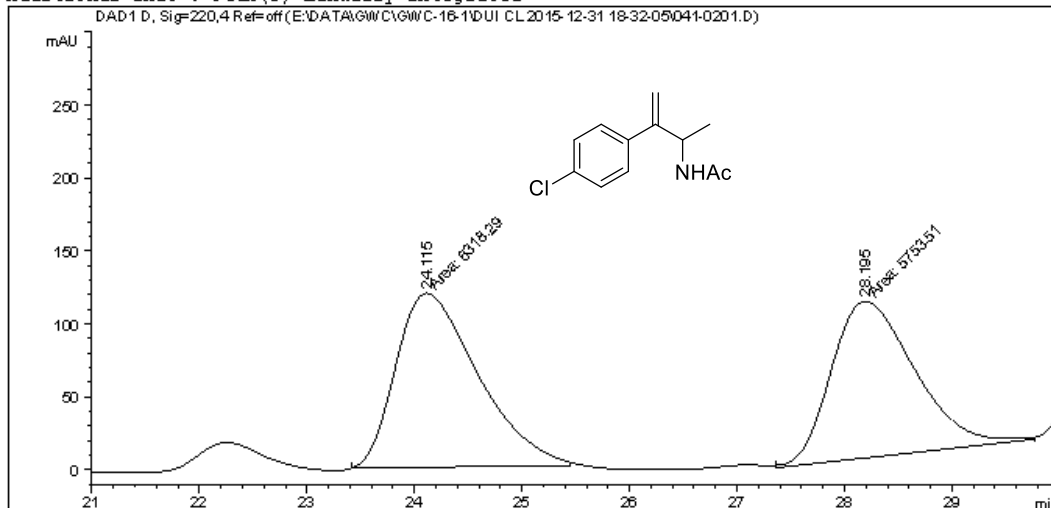

Area Percent Report

```

Sorted By      : Signal
Multiplier     : 1.0000
Dilution       : 1.0000
Do not use Multiplier & Dilution Factor with ISTDs
  
```

Signal 1: DAD1 D, Sig=220,4 Ref=off

| Peak # | RetTime [min] | Type | Width [min] | Area [mAU*s] | Height [mAU] | Area %  |
|--------|---------------|------|-------------|--------------|--------------|---------|
| 1      | 24.115        | MM   | 0.8840      | 6318.28906   | 119.12337    | 52.3393 |
| 2      | 28.195        | MM   | 0.8933      | 5753.50732   | 107.34454    | 47.6607 |

Totals : 1.20718e4 226.46790

\*\*\* End of Report \*\*\*

Data File E:\DATA\GWC\GWC-16-1\CL AND BR 0.5 2016-01-23 11-55-27\002-0301.D  
 Sample Name: Cl cui

```

=====
Acq. Operator   : SYSTEM                      Seq. Line :    3
Acq. Instrument : 1260HPLC-VWD                Location  : Vial 2
Injection Date  : 1/23/2016 12:47:46 PM      Inj       :    1
                                           Inj Volume: 5.000 µl
Acq. Method     : E:\DATA\GWC\GWC-16-1\CL AND BR 0.5 2016-01-23 11-55-27\VWD-ODH-95-5-
                220NM--0.5-40MIN(1-2).M
Last changed    : 1/23/2016 11:55:27 AM by SYSTEM
Analysis Method : E:\DATA\GWC\GWC-16-1\CL AND BR 0.5 2016-01-23 11-55-27\VWD-ODH-95-5-
                220NM--0.5-40MIN(1-2).M (Sequence Method)
Last changed    : 2/22/2016 10:43:51 AM by SYSTEM
                (modified after loading)
  
```

Additional Info : Peak(s) manually integrated

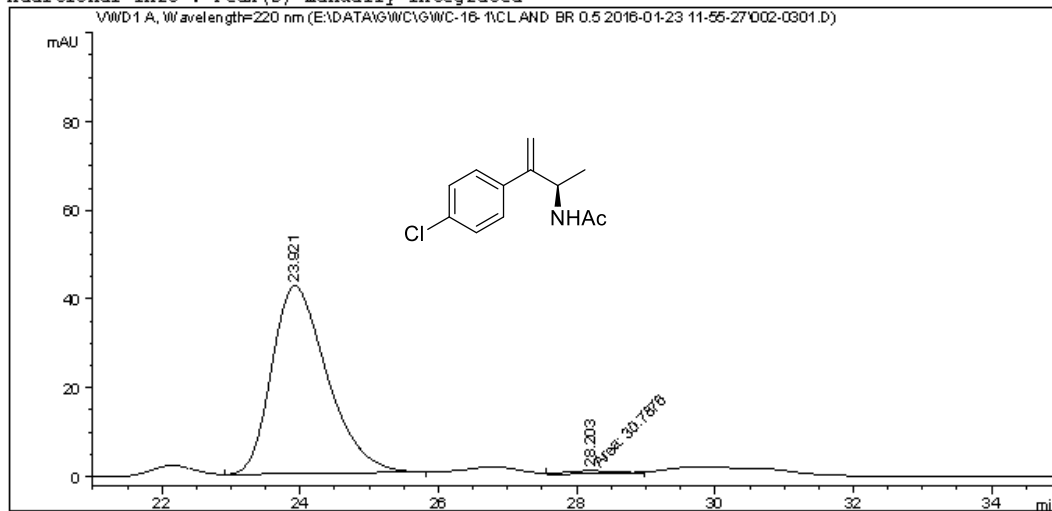

=====  
 Area Percent Report  
 =====

```

Sorted By       :      Signal
Multiplier      :      1.0000
Dilution        :      1.0000
Do not use Multiplier & Dilution Factor with ISTDs
  
```

Signal 1: VWD1 A, Wavelength=220 nm

| Peak # | RetTime [min] | Type | Width [min] | Area [mAU*s] | Height [mAU] | Area %  |
|--------|---------------|------|-------------|--------------|--------------|---------|
| 1      | 23.921        | BB   | 0.8510      | 2356.60718   | 42.29798     | 98.7104 |
| 2      | 28.203        | MM   | 0.7995      | 30.78764     | 6.41784e-1   | 1.2896  |

Totals :                    2387.39482    42.93977

=====  
 \*\*\* End of Report \*\*\*

2g - HPLC

Data File E:\DATA\WQL\WQL-2-98B\WQL-2-98B 2013-08-02 14-17-43\011-0201.D  
 Sample Name: wql-2-98-1

```

=====
Acq. Operator   : SYSTEM                      Seq. Line :    2
Acq. Instrument : 1260HPLC-VWD                Location  : Vial 11
Injection Date  : 8/2/2013 2:29:16 PM        Inj       :    1
                                           Inj Volume: 5.000 µl
Acq. Method     : E:\DATA\WQL\WQL-2-98B\WQL-2-98B 2013-08-02 14-17-43\WVD-0JH-99-1-IML-
                210NM-60MIN(1-2).M
Last changed    : 8/2/2013 2:17:43 PM by SYSTEM
Analysis Method : E:\DATA\WQL\WQL-2-98B\WQL-2-98B 2013-08-02 14-17-43\WVD-0JH-99-1-IML-
                210NM-60MIN(1-2).M (Sequence Method)
Last changed    : 4/29/2015 3:17:27 PM by SYSTEM
                (modified after loading)
Additional Info  : Peak(s) manually integrated
  
```

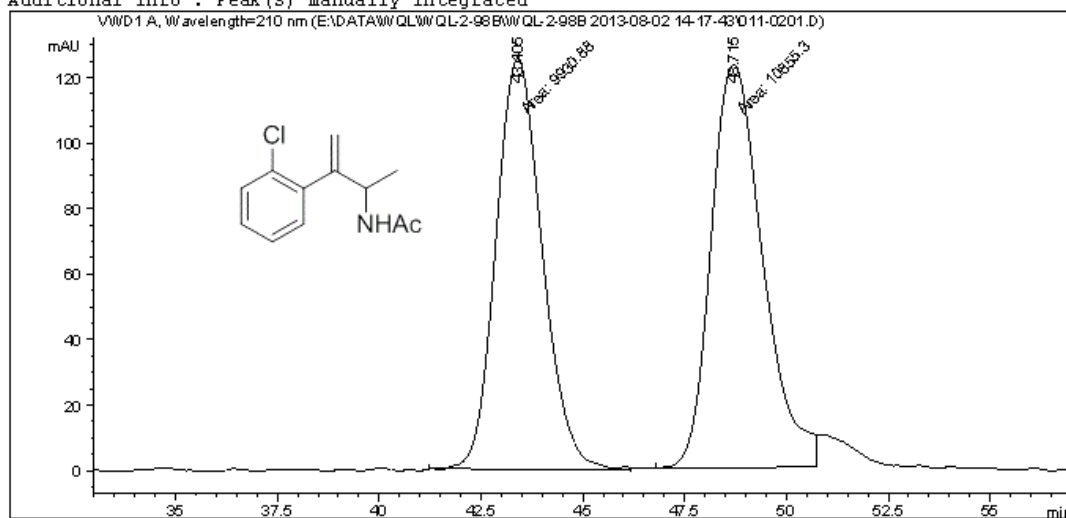

Area Percent Report

```

Sorted By      : Signal
Multiplier     : 1.0000
Dilution       : 1.0000
Do not use Multiplier & Dilution Factor with ISTDs
  
```

Signal 1: VWD1 A, Wavelength=210 nm

| Peak # | RetTime [min] | Type | Width [min] | Area [mAU*s] | Height [mAU] | Area %  |
|--------|---------------|------|-------------|--------------|--------------|---------|
| 1      | 43.405        | MM   | 1.3162      | 9930.87695   | 125.75005    | 47.7763 |
| 2      | 48.715        | MF   | 1.4712      | 1.08553e4    | 122.97532    | 52.2237 |

Totals : 2.07862e4 248.72537

\*\*\* End of Report \*\*\*

Data File E:\DATA\WQL\WQL-2-98B\WQL-2-98B 2013-08-02 14-17-43\012-0301.D  
 Sample Name: wql-2-98-2

```

=====
Acq. Operator   : SYSTEM                      Seq. Line :    3
Acq. Instrument : 1260HPLC-VWD              Location  : Vial 12
Injection Date  : 8/2/2013 3:30:04 PM       Inj       :    1
                                           Inj Volume: 5.000 µl
Acq. Method     : E:\DATA\WQL\WQL-2-98B\WQL-2-98B 2013-08-02 14-17-43\VWD-0JH-99-1-1ML-
                210NM-60MIN(1-2).M
Last changed    : 8/2/2013 2:17:43 PM by SYSTEM
Analysis Method : E:\DATA\WQL\WQL-2-98B\WQL-2-98B 2013-08-02 14-17-43\VWD-0JH-99-1-1ML-
                210NM-60MIN(1-2).M (Sequence Method)
Last changed    : 4/29/2015 3:17:27 PM by SYSTEM
                (modified after loading)
Additional Info : Peak(s) manually integrated
  
```

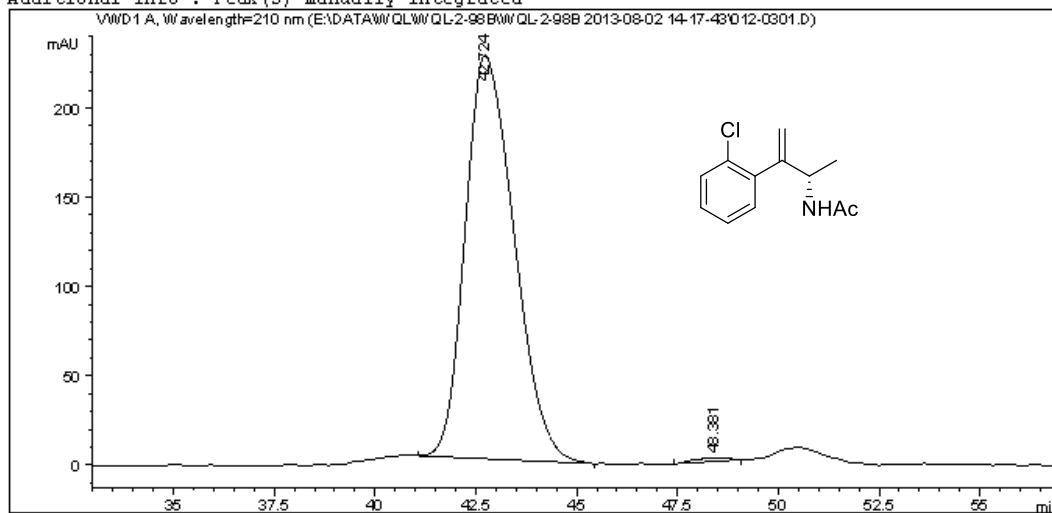

=====  
 Area Percent Report  
 =====

```

Sorted By       :      Signal
Multiplier      :      1.0000
Dilution       :      1.0000
Do not use Multiplier & Dilution Factor with ISTDs
  
```

Signal 1: VWD1 A, Wavelength=210 nm

| Peak # | RetTime [min] | Type | Width [min] | Area [mAU*s] | Height [mAU] | Area %  |
|--------|---------------|------|-------------|--------------|--------------|---------|
| 1      | 42.724        | BB   | 1.3405      | 1.90971e4    | 226.07219    | 99.3688 |
| 2      | 48.381        | BB   | 0.7205      | 121.31303    | 2.15591      | 0.6312  |

Totals :                    1.92184e4    228.22810

=====  
 \*\*\* End of Report \*\*\*



## 2h - HPLC

Data File E:\DATA\GWC\GWC-16-1\CL AND BR 0.5 2016-01-23 11-55-27\003-0501.D  
Sample Name: Br wai

```
=====
Acq. Operator   : SYSTEM                      Seq. Line :    5
Acq. Instrument : 1260HPLC-VWD                Location  : Vial 3
Injection Date  : 1/23/2016 1:39:25 PM        Inj       :    1
                                           Inj Volume: 5.000 µl
Acq. Method     : E:\DATA\GWC\GWC-16-1\CL AND BR 0.5 2016-01-23 11-55-27\VWD-ADH(1-6)-95-5
                                           -220NM--0.5-40MIN.M
Last changed    : 1/23/2016 11:55:27 AM by SYSTEM
Analysis Method : E:\DATA\GWC\GWC-16-1\CL AND BR 0.5 2016-01-23 11-55-27\VWD-ADH(1-6)-95-5
                                           -220NM--0.5-40MIN.M (Sequence Method)
Last changed    : 2/22/2016 10:38:39 AM by SYSTEM
                                           (modified after loading)
Additional Info : Peak(s) manually integrated
=====
```

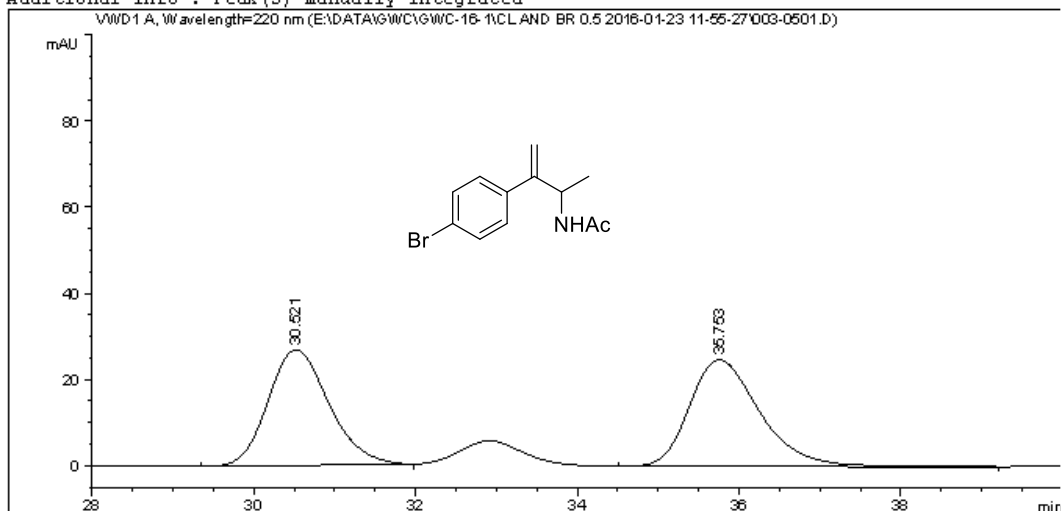

### Area Percent Report

```
Sorted By      : Signal
Multiplier     : 1.0000
Dilution       : 1.0000
Do not use Multiplier & Dilution Factor with ISTDs
```

Signal 1: VWD1 A, Wavelength=220 nm

| Peak # | RetTime [min] | Type | Width [min] | Area [mAU*s] | Height [mAU] | Area %  |
|--------|---------------|------|-------------|--------------|--------------|---------|
| 1      | 30.521        | BB   | 0.8054      | 1401.24109   | 26.82582     | 48.2459 |
| 2      | 35.753        | BB   | 0.9296      | 1503.12976   | 24.78430     | 51.7541 |

Totals : 2904.37085 51.61012

\*\*\* End of Report \*\*\*

=====

|                                       |                       |
|---------------------------------------|-----------------------|
| Acq. Operator : SYSTEM                | Seq. Line : 6         |
| Acq. Instrument : 1260HPLC-VWD        | Location : Vial 4     |
| Injection Date : 1/23/2016 2:20:10 PM | Inj : 1               |
|                                       | Inj Volume : 5.000 µl |

Acq. Method : E:\DATA\GWC\GWC-16-1\CL AND BR 0.5 2016-01-23 11-55-27\VWD-ADH(1-6)-95-5  
-220NM--0.5-40MIN.M  
Last changed : 1/23/2016 11:55:27 AM by SYSTEM  
Analysis Method : E:\DATA\GWC\GWC-16-1\CL AND BR 0.5 2016-01-23 11-55-27\VWD-ADH(1-6)-95-5  
-220NM--0.5-40MIN.M (Sequence Method)  
Last changed : 2/22/2016 10:40:23 AM by SYSTEM  
(modified after loading)

Additional Info : Peak(s) manually integrated

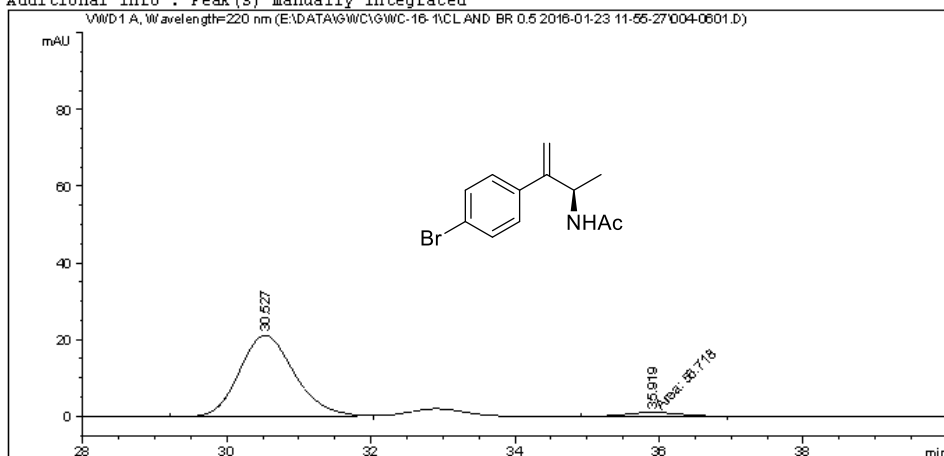

=====  
Area Percent Report  
=====

Sorted By : Signal  
Multiplier : 1.0000  
Dilution : 1.0000  
Do not use Multiplier & Dilution Factor with ISTDs

Signal 1: VWD1 A, Wavelength=220 nm

| Peak #   | RetTime [min] | Type | Width [min] | Area [mAU*s] | Height [mAU] | Area %  |
|----------|---------------|------|-------------|--------------|--------------|---------|
| 1        | 30.527        | BB   | 0.8207      | 1114.62036   | 21.05220     | 95.1578 |
| 2        | 35.919        | MM   | 0.9285      | 56.71799     | 1.01808      | 4.8422  |
| Totals : |               |      |             | 1171.33835   | 22.07028     |         |

=====  
\*\*\* End of Report \*\*\*

2i - HPLC

Data File E:\DATA\GWC\GWC-16-1\ZHIAND NAI 2016-01-25 16-12-53\003-0501.D  
 Sample Name: NAI WAI

```

=====
Acq. Operator   : SYSTEM                      Seq. Line :    5
Acq. Instrument : 1260HPLC-VWD                 Location  : Vial 3
Injection Date  : 1/25/2016 6:59:23 PM       Inj       :    1
                                           Inj Volume: 5.000 µl
Acq. Method     : E:\DATA\GWC\GWC-16-1\ZHIAND NAI 2016-01-25 16-12-53\VWD-ADH(1-6)-95-5-
                220NM--0.5-40MIN.M
Last changed    : 1/25/2016 4:12:54 PM by SYSTEM
Analysis Method : E:\DATA\GWC\GWC-16-1\ZHIAND NAI 2016-01-25 16-12-53\VWD-ADH(1-6)-95-5-
                220NM--0.5-40MIN.M (Sequence Method)
Last changed    : 2/22/2016 10:54:38 AM by SYSTEM
                (modified after loading)
Additional Info : Peak(s) manually integrated
  
```

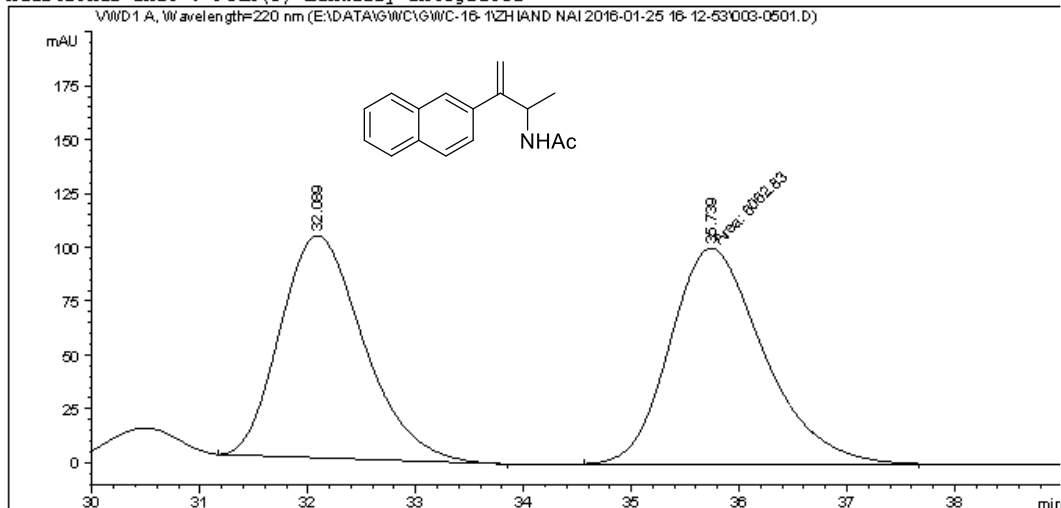

Area Percent Report

```

Sorted By      : Signal
Multiplier     : 1.0000
Dilution       : 1.0000
Do not use Multiplier & Dilution Factor with ISTDs
  
```

Signal 1: VWD1 A, Wavelength=220 nm

| Peak # | RetTime [min] | Type | Width [min] | Area [mAU*s] | Height [mAU] | Area %  |
|--------|---------------|------|-------------|--------------|--------------|---------|
| 1      | 32.089        | BB   | 0.8365      | 5530.81592   | 102.99131    | 47.7056 |
| 2      | 35.739        | MM   | 1.0085      | 6062.83252   | 100.19076    | 52.2944 |

Totals : 1.15936e4 203.18207

\*\*\* End of Report \*\*\*

Data File E:\DATA\GWC\GWC-16-1\ZHIAND NAI 2016-01-25 16-12-53\004-0601.D  
 Sample Name: NAI CUI

```

=====
Acq. Operator   : SYSTEM                      Seq. Line :    6
Acq. Instrument : 1260HPLC-VWD                Location  : Vial 4
Injection Date  : 1/25/2016 7:40:08 PM        Inj       :    1
                                           Inj Volume: 5.000 µl
Acq. Method     : E:\DATA\GWC\GWC-16-1\ZHIAND NAI 2016-01-25 16-12-53\VWD-ADH(1-6)-95-5-
                220NM--0.5-40MIN.M
Last changed    : 1/25/2016 4:12:54 PM by SYSTEM
Analysis Method : E:\DATA\GWC\GWC-16-1\ZHIAND NAI 2016-01-25 16-12-53\VWD-ADH(1-6)-95-5-
                220NM--0.5-40MIN.M (Sequence Method)
Last changed    : 2/22/2016 10:55:47 AM by SYSTEM
                (modified after loading)
Additional Info : Peak(s) manually integrated
  
```

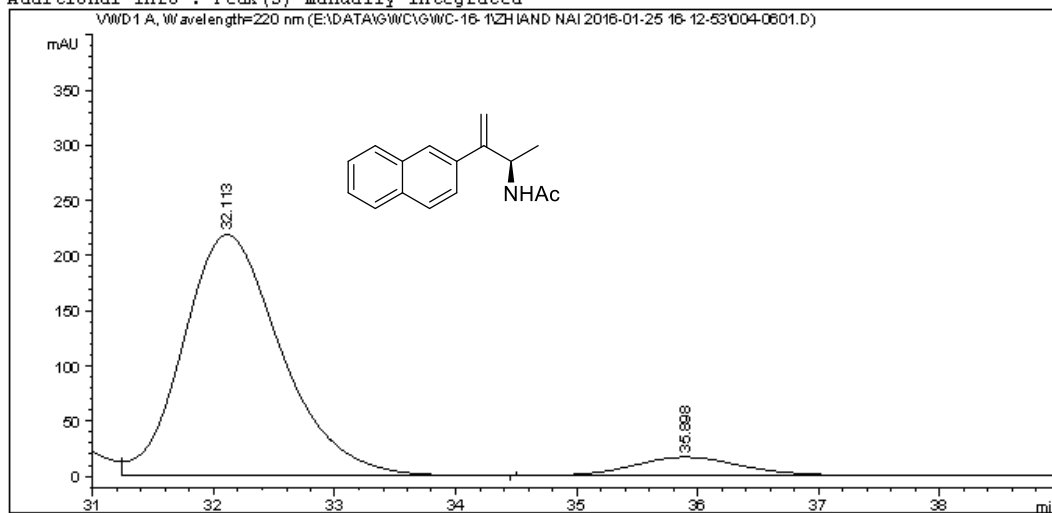

=====  
 Area Percent Report  
 =====

```

Sorted By       :      Signal
Multiplier      :      1.0000
Dilution        :      1.0000
Do not use Multiplier & Dilution Factor with ISTDs
  
```

Signal 1: VWD1 A, Wavelength=220 nm

| Peak # | RetTime [min] | Type | Width [min] | Area [mAU*s] | Height [mAU] | Area %  |
|--------|---------------|------|-------------|--------------|--------------|---------|
| 1      | 32.113        | VB   | 0.8641      | 1.22601e4    | 218.34422    | 91.8003 |
| 2      | 35.898        | BB   | 0.9762      | 1095.08386   | 17.03093     | 8.1997  |

Totals :                    1.33552e4   235.37515

=====  
 \*\*\* End of Report \*\*\*

2j - HPLC

Data File E:\DATA\GWC\GWC-16-1\ZHIAND NAI 2016-01-25 16-12-53\001-0201.D  
 Sample Name: ZHI WAI

```

=====
Acq. Operator   : SYSTEM                      Seq. Line :    2
Acq. Instrument : 1260HPLC-VWD                Location  : Vial 1
Injection Date  : 1/25/2016 4:24:27 PM       Inj       :    1
                                           Inj Volume: 5.000 µl
Acq. Method     : E:\DATA\GWC\GWC-16-1\ZHIAND NAI 2016-01-25 16-12-53\VWD-0J(1-2)-95-5-0.
                                           5ML-60MIN-220NM.M
Last changed    : 1/25/2016 5:15:29 PM by SYSTEM
                                           (modified after loading)
Analysis Method : E:\DATA\GWC\GWC-16-1\ZHIAND NAI 2016-01-25 16-12-53\VWD-0J(1-2)-95-5-0.
                                           5ML-60MIN-220NM.M (Sequence Method)
Last changed    : 2/23/2016 9:03:26 PM by SYSTEM
                                           (modified after loading)
Additional Info : Peak(s) manually integrated
  
```

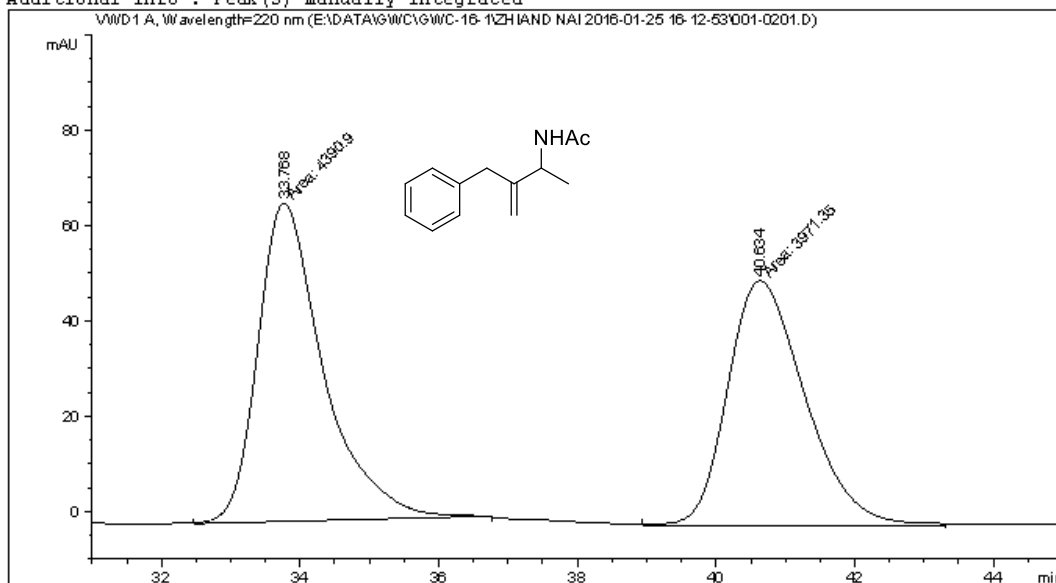

Area Percent Report

```

Sorted By      : Signal
Multiplier     : 1.0000
Dilution       : 1.0000
Do not use Multiplier & Dilution Factor with ISTDs
  
```

Signal 1: WWD1 A, Wavelength=220 nm

| Peak # | RetTime [min] | Type | Width [min] | Area [mAU*s] | Height [mAU] | Area %  |
|--------|---------------|------|-------------|--------------|--------------|---------|
| 1      | 33.768        | MM   | 1.0958      | 4390.90186   | 66.78225     | 52.5086 |
| 2      | 40.634        | MM   | 1.2913      | 3971.35083   | 51.25767     | 47.4914 |

Totals : 8362.25269 118.03992

```

=====
Acq. Operator   : SYSTEM                      Seq. Line :    3
Acq. Instrument : 1260HPLC-VWD                Location  : Vial 2
Injection Date  : 1/25/2016 5:35:12 PM        Inj       :    1
                                           Inj Volume: 5.000 µl
Acq. Method     : E:\DATA\GWC\GWC-16-1\ZHIAND NAI 2016-01-25 16-12-53\VWD-0J(1-2)-95-5-0.
                                           SML-60MIN-220NM.M
Last changed    : 1/25/2016 5:15:29 PM by SYSTEM
Analysis Method : E:\DATA\GWC\GWC-16-1\ZHIAND NAI 2016-01-25 16-12-53\VWD-0J(1-2)-95-5-0.
                                           SML-60MIN-220NM.M (Sequence Method)
Last changed    : 2/23/2016 9:04:09 PM by SYSTEM
                                           (modified after loading)
  
```

Additional Info : Peak(s) manually integrated

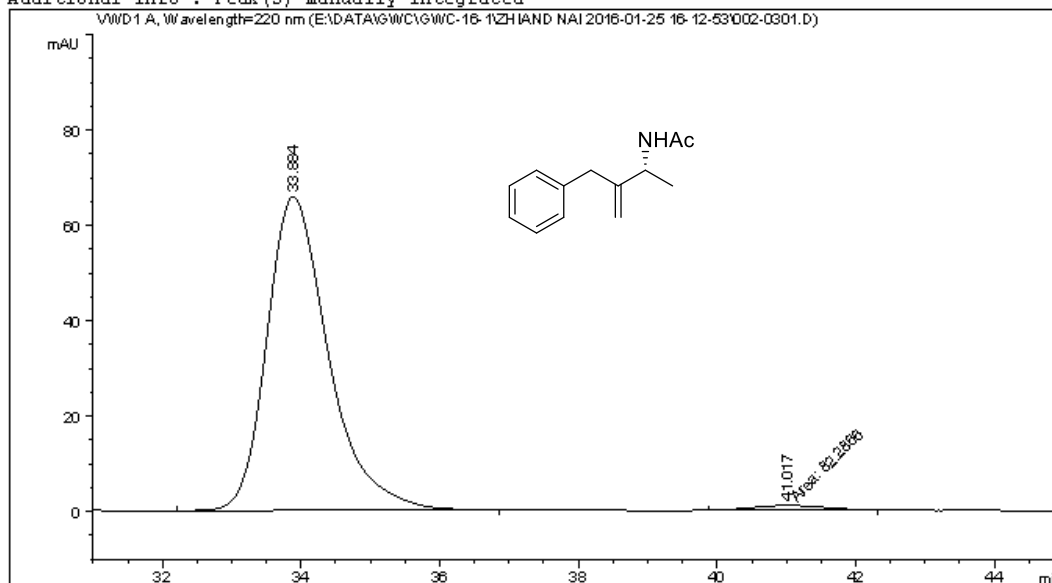

Area Percent Report

```

Sorted By      : Signal
Multiplier     : 1.0000
Dilution       : 1.0000
Do not use Multiplier & Dilution Factor with ISTDs
  
```

Signal 1: VWD1 A, Wavelength=220 nm

| Peak # | RetTime [min] | Type | Width [min] | Area [mAU*s] | Height [mAU] | Area %  |
|--------|---------------|------|-------------|--------------|--------------|---------|
| 1      | 33.884        | BB   | 0.9414      | 4054.80493   | 65.84998     | 98.0110 |
| 2      | 41.017        | MM   | 1.2843      | 82.28664     | 1.06783      | 1.9890  |

Totals : 4137.09158 66.91781

\*\*\* End of Report \*\*\*

2k - HPLC

Data File E:\DATA\GWC\GWC15-1-9\15-9-15 2015-10-09 19-17-23\073-0301.D  
 Sample Name: wai

```

=====
Acq. Operator   : SYSTEM                      Seq. Line :    3
Acq. Instrument : 1260HPLC-DAD                Location  : Vial 73
Injection Date  : 10/9/2015 7:55:09 PM       Inj       :    1
                                           Inj Volume: 5.000 µl
Acq. Method     : E:\DATA\GWC\GWC15-1-9\15-9-15 2015-10-09 19-17-23\DAD-ODH-90-10-IML-
40MIN(1-2).M
Last changed    : 10/9/2015 7:52:27 PM by SYSTEM
Analysis Method : E:\DATA\GWC\GWC15-1-9\15-9-15 2015-10-09 19-17-23\DAD-ODH-90-10-IML-
40MIN(1-2).M (Sequence Method)
Last changed    : 2/23/2016 7:42:31 PM by SYSTEM
                  (modified after loading)
  
```

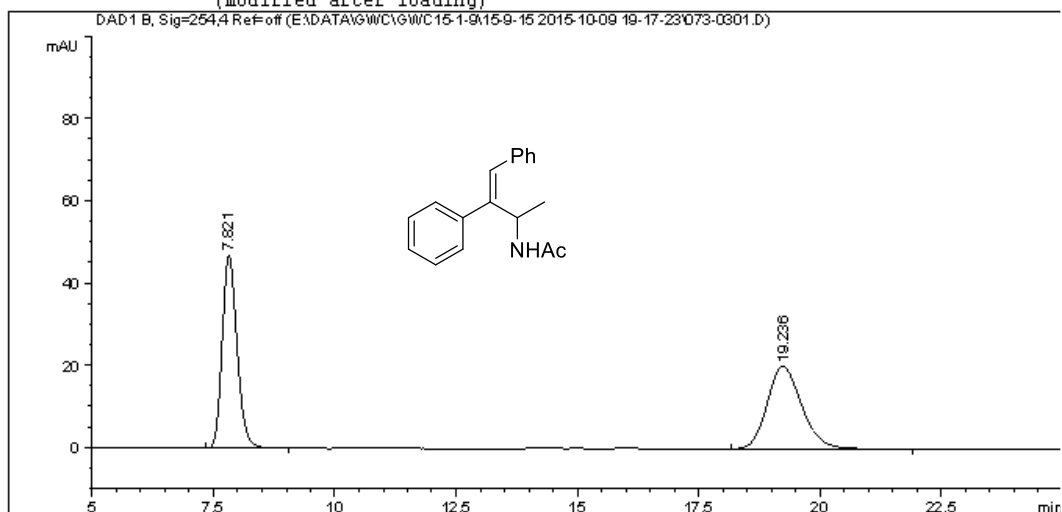

Area Percent Report

```

Sorted By      :      Signal
Multiplier     :      1.0000
Dilution       :      1.0000
Do not use Multiplier & Dilution Factor with ISTDs
  
```

Signal 1: DAD1 B, Sig=254,4 Ref=off

| Peak # | RetTime [min] | Type | Width [min] | Area [mAU*s] | Height [mAU] | Area %  |
|--------|---------------|------|-------------|--------------|--------------|---------|
| 1      | 7.821         | BB   | 0.3256      | 995.52374    | 46.90849     | 49.9797 |
| 2      | 19.236        | BB   | 0.7527      | 996.33215    | 20.01796     | 50.0203 |

Totals :                    1991.85590    66.92645

\*\*\* End of Report \*\*\*

```

=====
Acq. Operator   : SYSTEM                      Seq. Line :    2
Acq. Instrument : 1260HPLC-DAD                Location  : Vial 72
Injection Date  : 10/9/2015 7:29:15 PM       Inj       :    1
                                           Inj Volume: 5.000 µl
Acq. Method     : E:\DATA\GWC\GWC15-1-9\15-9-15 2015-10-09 19-17-23\DAD-ODH-90-10-1ML-
40MIN(1-2).M
Last changed    : 10/9/2015 7:52:27 PM by SYSTEM
                  (modified after loading)
Analysis Method : E:\DATA\GWC\GWC15-1-9\15-9-15 2015-10-09 19-17-23\DAD-ODH-90-10-1ML-
40MIN(1-2).M (Sequence Method)
Last changed    : 2/23/2016 7:43:46 PM by SYSTEM
                  (modified after loading)
Additional Info : Peak(s) manually integrated
  
```

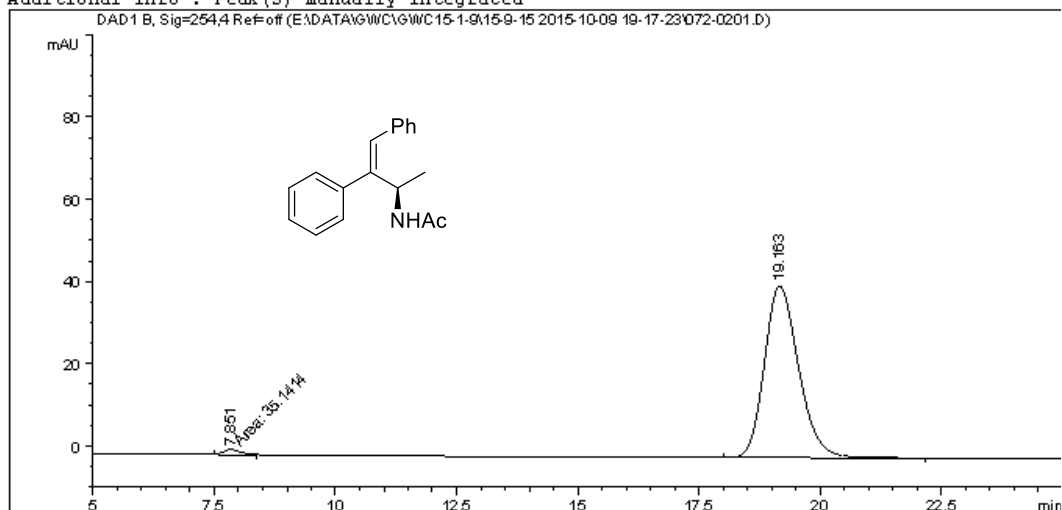

=====  
 Area Percent Report  
 =====

```

Sorted By      :      Signal
Multiplier     :      1.0000
Dilution      :      1.0000
Do not use Multiplier & Dilution Factor with ISTDs
  
```

Signal 1: DAD1 B, Sig=254,4 Ref=off

| Peak # | RetTime [min] | Type | Width [min] | Area [mAU*s] | Height [mAU] | Area %  |
|--------|---------------|------|-------------|--------------|--------------|---------|
| 1      | 7.851         | MM   | 0.4481      | 35.14143     | 1.30715      | 1.6841  |
| 2      | 19.163        | BB   | 0.7590      | 2051.52808   | 41.77021     | 98.3159 |

Totals :                    2086.66951    43.07736

=====  
 \*\*\* End of Report \*\*\*



21 - HPLC

Data File E:\DATA\GWC\GWC15-1-9\GWC-15-9-18 2015-10-15 08-07-49\021-0301.D  
 Sample Name: 15-9-19-2

```

=====
Acq. Operator   : SYSTEM                      Seq. Line :    3
Acq. Instrument : 1260HPLC-DAD                Location  : Vial 21
Injection Date  : 10/15/2015 8:56:04 AM      Inj       :    1
                                           Inj Volume: 5.000 µl
Acq. Method     : E:\DATA\GWC\GWC15-1-9\GWC-15-9-18 2015-10-15 08-07-49\DAD-ODH-95-5-1ML-
                220-254NM-40MIN(1-2).M
Last changed    : 10/15/2015 9:26:39 AM by SYSTEM
                (modified after loading)
Analysis Method : E:\DATA\GWC\GWC15-1-9\GWC-15-9-18 2015-10-15 08-07-49\DAD-ODH-95-5-1ML-
                220-254NM-40MIN(1-2).M (Sequence Method)
Last changed    : 2/23/2016 7:56:24 PM by SYSTEM
                (modified after loading)
Additional Info  : Peak(s) manually integrated
  
```

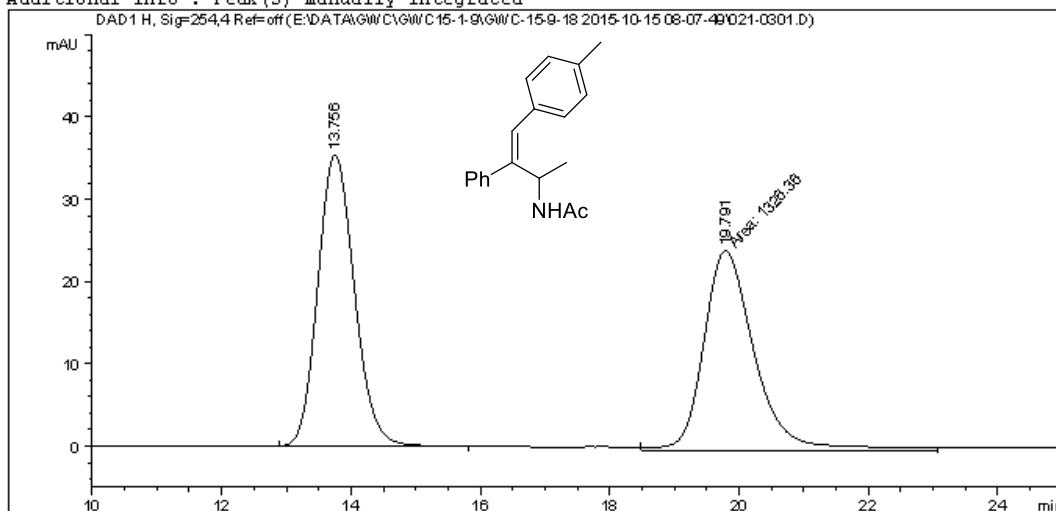

Area Percent Report

```

Sorted By      : Signal
Multiplier     : 1.0000
Dilution       : 1.0000
Do not use Multiplier & Dilution Factor with ISTDs
  
```

Signal 1: DAD1 H, Sig=254,4 Ref=off

| Peak # | RetTime [min] | Type | Width [min] | Area [mAU*s] | Height [mAU] | Area %  |
|--------|---------------|------|-------------|--------------|--------------|---------|
| 1      | 13.756        | BB   | 0.6139      | 1391.82678   | 35.45882     | 51.2043 |
| 2      | 19.791        | MM   | 0.9116      | 1326.35547   | 24.24839     | 48.7957 |

Totals : 2718.18225 59.70722

\*\*\* End of Report \*\*\*

Data File E:\DATA\GWC\GWC15-1-9\GWC-15-9-18 2015-10-15 08-07-49\022-0401.D  
 Sample Name: 15-9-18

```

=====
Acq. Operator   : SYSTEM                               Seq. Line :    4
Acq. Instrument : 1260HPLC-DAD                        Location  : Vial 22
Injection Date  : 10/15/2015 9:27:57 AM              Inj       :    1
                                                    Inj Volume: 5.000 µl
Acq. Method    : E:\DATA\GWC\GWC15-1-9\GWC-15-9-18 2015-10-15 08-07-49\DAD-ODH-95-5-IML-
                220-254NM-40MIN(1-2).M
Last changed   : 10/15/2015 9:28:31 AM by SYSTEM
                (modified after loading)
Analysis Method: E:\DATA\GWC\GWC15-1-9\GWC-15-9-18 2015-10-15 08-07-49\DAD-ODH-95-5-IML-
                220-254NM-40MIN(1-2).M (Sequence Method)
Last changed   : 2/23/2016 7:57:36 PM by SYSTEM
                (modified after loading)
Additional Info : Peak(s) manually integrated
  
```

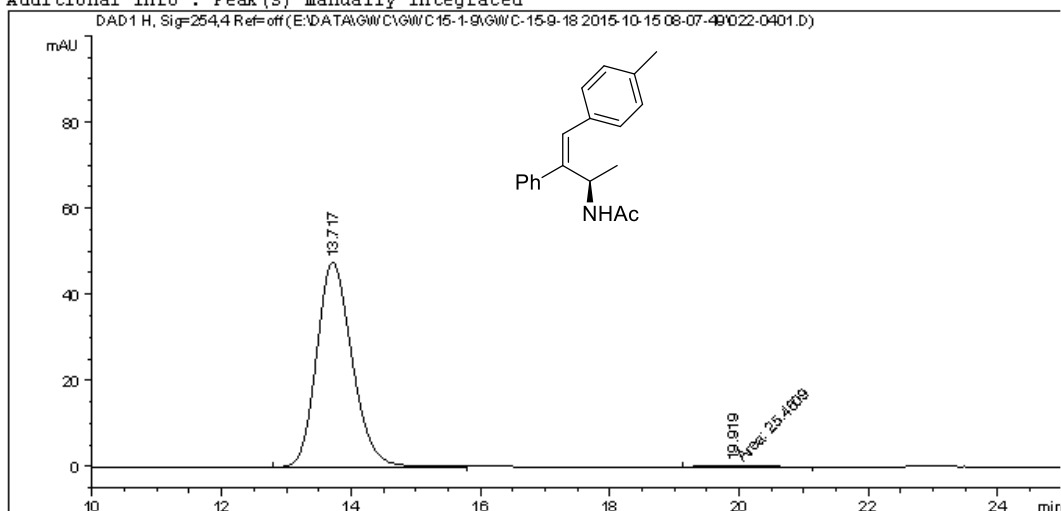

=====  
 Area Percent Report  
 =====

```

Sorted By      :      Signal
Multiplier     :      1.0000
Dilution       :      1.0000
Do not use Multiplier & Dilution Factor with ISTDs
  
```

Signal 1: DAD1 H, Sig=254,4 Ref=off

| Peak # | RetTime [min] | Type | Width [min] | Area [mAU*s] | Height [mAU] | Area %  |
|--------|---------------|------|-------------|--------------|--------------|---------|
| 1      | 13.717        | BB   | 0.5831      | 1802.31653   | 47.45339     | 98.6070 |
| 2      | 19.919        | MM   | 0.9870      | 25.46087     | 4.29932e-1   | 1.3930  |

Totals :                    1827.77740    47.88332

=====  
 \*\*\* End of Report \*\*\*

2m - HPLC

Data File E:\DATA\GWC\GWC15-11\GWC-15-11-3 2015-11-17 11-05-41\062-0301.D  
 Sample Name: SLY-3-70-1-J

```

=====
Acq. Operator   : SYSTEM                      Seq. Line :    3
Acq. Instrument : 1260HPLC-VWD                Location  : Vial 62
Injection Date  : 11/17/2015 11:48:05 AM      Inj       :    1
                                           Inj Volume: 5.000 µl
Acq. Method     : E:\DATA\GWC\GWC15-11\GWC-15-11-3 2015-11-17 11-05-41\VWD-ADH(1-2)-95-5-
                220-254NM-40MIN.M
Last changed    : 11/17/2015 11:42:01 AM by SYSTEM
Analysis Method : E:\DATA\GWC\GWC15-11\GWC-15-11-3 2015-11-17 11-05-41\VWD-ADH(1-2)-95-5-
                220-254NM-40MIN.M (Sequence Method)
Last changed    : 2/23/2016 8:59:45 PM by SYSTEM
                (modified after loading)
Additional Info : Peak(s) manually integrated
=====
  
```

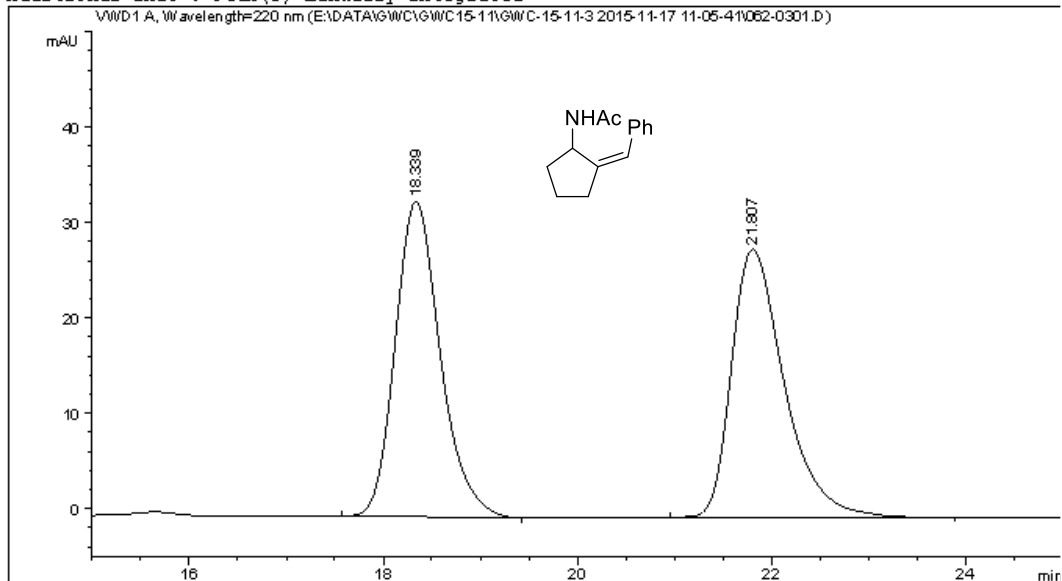

Area Percent Report

```

Sorted By      : Signal
Multiplier     : 1.0000
Dilution       : 1.0000
Do not use Multiplier & Dilution Factor with ISTDs
  
```

Signal 1: VWD1 A, Wavelength=220 nm

| Peak # | RetTime [min] | Type | Width [min] | Area [mAU*s] | Height [mAU] | Area %  |
|--------|---------------|------|-------------|--------------|--------------|---------|
| 1      | 18.339        | BB   | 0.4951      | 1067.27368   | 33.10320     | 50.2909 |
| 2      | 21.807        | BB   | 0.5744      | 1054.92639   | 28.07599     | 49.7091 |

Totals : 2122.20007 61.17919

\*\*\* End of Report \*\*\*

Data File E:\DATA\GWC\GWC15-11\GWC-15-11-3 2015-11-17 11-05-41\061-0201.D  
 Sample Name: SLY-3-70-3-J

```

=====
Acq. Operator   : SYSTEM                      Seq. Line :    2
Acq. Instrument : 1260HPLC-VWD                Location  : Vial 61
Injection Date  : 11/17/2015 11:17:19 AM      Inj       :    1
                                           Inj Volume: 5.000 µl
Acq. Method     : E:\DATA\GWC\GWC15-11\GWC-15-11-3 2015-11-17 11-05-41\VWD-ADH(1-2)-95-5-
                220-254NM-40MIN.M
Last changed    : 11/17/2015 11:42:01 AM by SYSTEM
                (modified after loading)
Analysis Method : E:\DATA\GWC\GWC15-11\GWC-15-11-3 2015-11-17 11-05-41\VWD-ADH(1-2)-95-5-
                220-254NM-40MIN.M (Sequence Method)
Last changed    : 2/23/2016 9:01:10 PM by SYSTEM
                (modified after loading)
Additional Info : Peak(s) manually integrated
  
```

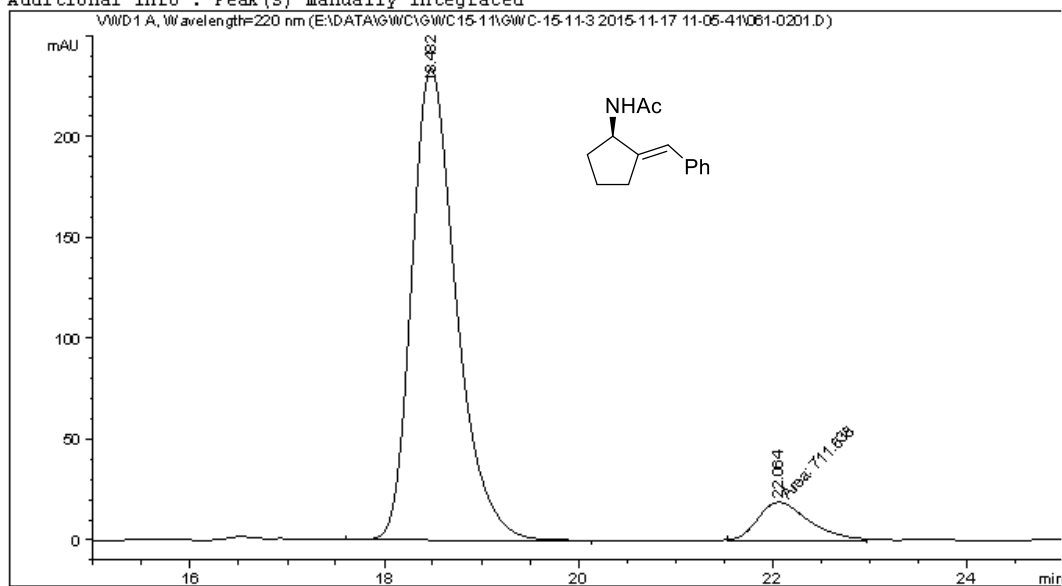

=====  
 Area Percent Report  
 =====

```

Sorted By      :      Signal
Multiplier     :      1.0000
Dilution       :      1.0000
Do not use Multiplier & Dilution Factor with ISTDs
  
```

Signal 1: VWD1 A, Wavelength=220 nm

| Peak # | RetTime [min] | Type | Width [min] | Area [mAU*s] | Height [mAU] | Area %  |
|--------|---------------|------|-------------|--------------|--------------|---------|
| 1      | 18.482        | BB   | 0.4863      | 7425.51709   | 233.97545    | 91.2545 |
| 2      | 22.064        | MM   | 0.6197      | 711.63751    | 19.13794     | 8.7455  |

Totals :                    8137.15460   253.11339
